# Supplementary material
Source: PubMed Central journal article supplement (PMC9545402)
Supplement: IJC-151-1033-s001.pdf [file IJC-151-1033-s001.pdf]

# Circulating free testosterone and risk of aggressive prostate cancer: prospective and Mendelian randomization analyses in international consortia- Supplementary Tables and Figures

## Authors

Eleanor L. Watts, Aurora Perez-Cornago, Georgina K. Fensom, Karl Smith-Byrne, Urwah Noor, Colm D. Andrews, Marc J. Gunter, Michael V. Holmes, Richard M. Martin, Konstantinos K. Tsilidis, Demetrius Albanes, Aurelio Barricarte, H. Bas Bueno-de-Mesquita, Chu Chen, Barbara A. Cohn, Niki L. Dimou, Luigi Ferrucci, Leon Flicker, Neal D. Freedman, Graham G. Giles, Edward L. Giovannucci, Gary E. Goodman, Christopher A. Haiman, Graeme J. Hankey, Jiaqi Huang, Wen-Yi Huang, Lauren M. Hurwitz, Rudolf Kaaks, Paul Knekt, Tatsuhiko Kubo, Hilde Langseth, Gail Laughlin, Loic Le Marchand, Tapio Luostarinen, Robert J. MacInnis, Hanna O. Mäenpää, Satu Männistö, E. Jeffrey Metter, Kazuya Mikami, Lorelei A. Mucci, Anja W. Olsen, Kotaro Ozasa, Domenico Palli, Kathryn L. Penney, Elizabeth A. Platz, Harri Rissanen, Norie Sawada, Jeannette M. Schenk, Pär Stattin, Akiko Tamakoshi, Elin Thysell, Chiaojung Jillian Tsai, Shoichiro Tsugane, Lars Vatten, Elisabete Weiderpass, Stephanie J. Weinstein, Lynne R. Wilkens, Bu B. Yeap, The PRACTICAL consortium, CRUK, BPC3, CAPS, PEGASUS, Naomi E. Allen, Timothy J. Key, Ruth C. Travis.

| <b>Table of contents</b>                                                                                                                                                                                                             | <b>Page</b> |
|--------------------------------------------------------------------------------------------------------------------------------------------------------------------------------------------------------------------------------------|-------------|
| <b>Supplementary Methods</b>                                                                                                                                                                                                         | 3-6         |
| <b>Supplementary Tables</b>                                                                                                                                                                                                          |             |
| Supplementary Table 1: Sample populations, recruitment and case ascertainment methods                                                                                                                                                | 7-8         |
| Supplementary Table 2: Criteria used by individual studies to match case patients and control subjects                                                                                                                               | 9-10        |
| Supplementary Table 3: Assay methods and geometric mean hormone concentrations by study                                                                                                                                              | 11          |
| Supplementary Table 4: Prostate cancer characteristics in participating EHNBPCCG studies                                                                                                                                             | 12          |
| Supplementary Table 5: Partial correlation coefficients of circulating biomarkers in prostate cancer controls                                                                                                                        | 13          |
| Supplementary Table 6: Risks of overall, aggressive and early-onset prostate cancer per 80% tile increment in biomarker concentrations in the EHNBPCCG studies                                                                       | 14          |
| Supplementary Table 7: Risks of overall, aggressive and early-onset prostate cancer per study-specific 1 SD increment in biomarker concentrations with mutual adjustment, among cases and their matched controls in EHNBPCCG studies | 15          |
| Supplementary Table 8: Risks of overall prostate cancer in relation to biomarkers, stratified by other study-specific median biomarker concentrations in EHNBPCCG studies                                                            | 16          |
| Supplementary Table 9: Risks of aggressive prostate cancer in relation to biomarkers, stratified by other study-specific median biomarker concentrations in EHNBPCCG studies                                                         | 17          |
| Supplementary Table 10: Trait associations with the SHBG cis-SNP*                                                                                                                                                                    | 18          |
| Supplementary Table 11: Association of free testosterone SNPs used in 2-sample Mendelian randomization analyses with prostate cancer                                                                                                 | 19-20       |
| Supplementary Table 12: Association of total testosterone SNPs used in 2-sample Mendelian randomization analyses with prostate cancer                                                                                                | 21-23       |
| Supplementary Table 13: Association of SHBG SNPs used in 2-sample Mendelian randomization analyses with prostate cancer                                                                                                              | 24-27       |
| <b>Supplementary Figures</b>                                                                                                                                                                                                         |             |
| Supplementary Figure 1: Risks of overall and aggressive* prostate cancer in by study-specific fifths of free testosterone concentrations and per 1 SD increment, stratified by age at blood collection                               | 28          |

|                                                                                                                                                                                                                 |       |
|-----------------------------------------------------------------------------------------------------------------------------------------------------------------------------------------------------------------|-------|
| Supplementary Figure 2: Odds ratio (95% CIs) for overall prostate cancer per study-specific 1 SD increment of total testosterone concentration by subgroup                                                      | 29    |
| Supplementary Figure 3: Odds ratio (95% CIs) for aggressive* prostate cancer per study-specific 1 SD increment of total testosterone concentration by subgroup                                                  | 30    |
| Supplementary Figure 4: Odds ratio (95% CIs) for overall prostate cancer per study-specific 1 SD increment of SHBG concentration by subgroup                                                                    | 31    |
| Supplementary Figure 5: Odds ratio (95% CIs) for aggressive* prostate cancer per study-specific 1 SD increment of SHBG concentration by subgroup                                                                | 32    |
| Supplementary Figure 6: Odds ratios (95% confidence intervals) for overall prostate cancer associated with a 1 SD increment in free testosterone by study                                                       | 33    |
| Supplementary Figure 7: Odds ratios (95% confidence intervals) for aggressive prostate cancer associated with a 1 SD increment in free testosterone by study                                                    | 34    |
| Supplementary Figure 8: Odds ratios (95% confidence intervals) for prostate cancer associated with a 1 SD increment in total testosterone by study                                                              | 35    |
| Supplementary Figure 9: Odds ratios (95% confidence intervals) for aggressive prostate cancer associated with a 1 SD increment in total testosterone by study                                                   | 36    |
| Supplementary Figure 10: Odds ratios (95% confidence intervals) for prostate cancer associated with a 1 SD increment in sex hormone-binding globulin by study                                                   | 37    |
| Supplementary Figure 11: Odds ratios (95% confidence intervals) for aggressive prostate cancer associated with a 1 SD increment in sex hormone-binding globulin by study                                        | 38    |
| Supplementary Figure 12: Risks of overall, aggressive and early-onset prostate cancer* by study-specific fifths of biomarker concentrations and 1 SD increment in the unadjusted model.                         | 39    |
| Supplementary Figure 13: Risks of overall and aggressive* prostate cancer by study-specific tenths of biomarker concentrations and 90%tile increment.                                                           | 40    |
| Supplementary Figure 14: Traits associated with each free testosterone associated SNP used in the Mendelian randomization analyses                                                                              | 41    |
| Supplementary Figure 15: Traits associated with each total testosterone associated SNP used in the Mendelian randomization analyses                                                                             | 42    |
| Supplementary Figure 16: Traits associated with each SHBG associated SNP used in the Mendelian randomization analyses                                                                                           | 43    |
| Supplementary Figure 17: Scatterplot of genetic associations with free testosterone against genetic associations with: A) Overall prostate cancer B) Aggressive prostate cancer C) Early-onset prostate cancer  | 44    |
| Supplementary Figure 18: Scatterplot of genetic associations with total testosterone against genetic associations with: A) Overall prostate cancer B) Aggressive prostate cancer C) Early-onset prostate cancer | 45    |
| Supplementary Figure 19: Scatterplot of genetic associations with SHBG against genetic associations with: A) Overall prostate cancer B) Aggressive prostate cancer C) Early-onset prostate cancer               | 46    |
| <b>References</b>                                                                                                                                                                                               | 47-49 |

## Supplementary methods

### *i. Endogenous Hormones, Nutritional Biomarkers and Prostate Cancer Collaborative Group*

#### Data collection

Principal investigators were invited to join this collaborative group if they had published or unpublished studies on prostate cancer risk and endogenous sex hormone and/or nutritional biomarker concentrations that had been determined from blood samples collected before diagnosis. Studies were identified by literature searches of computerised bibliographic systems, including PubMed, Web of Science, Cochrane Library, and CancerLit, and through discussions with colleagues<sup>3</sup>.

Individual participant data were available from 25 prospective studies by dataset closure on 1<sup>st</sup> December 2019. We included all prospective studies with total testosterone and sex hormone-binding globulin (SHBG) measurements. In total, 14,944 cases and 36,752 controls, including 1,870 aggressive, and 611 early-onset prostate cancer cases were analysed from the following studies: Alpha-Tocopherol, Beta-Carotene Cancer Prevention Study (ATBC)<sup>4</sup>, Baltimore Longitudinal Study of Aging (BLSA)<sup>5,6</sup>, Carotene and Retinol Efficacy Trial (CARET)<sup>7</sup>, Child Health and Development Studies (CHDS)<sup>8,9</sup>, CLUE I<sup>10</sup>, European Prospective Investigation into Cancer and Nutrition (EPIC)<sup>11</sup>, EPIC Norfolk<sup>12</sup>, Finnish Mobile Clinic (FMC)<sup>13</sup>, Helsinki Heart Study Nordic Biological Specimen Biobank Working Group (HHS NBSBWG)<sup>14,15</sup>, Health In Men Study (HIMS)<sup>16-18</sup>, Health Professionals Follow-up Study (HPFS)<sup>19</sup>, Japan Collaborative Cohort Study (JACC)<sup>20</sup>, Japan–Hawaii Cancer Study (JHCS)<sup>21,22</sup>, Japan Public Health Center-based prospective study (JPHC)<sup>23</sup>, Janus<sup>24</sup>, Janus NBSBWG<sup>14</sup>, Melbourne Collaborative Cohort Study (MCCS)<sup>25</sup>, Multiethnic Cohort (MEC)<sup>26</sup>, Massachusetts Male Aging Study (MMAS)<sup>27</sup>, Northern Sweden Health and Disease Cohort (NSHDC)<sup>14</sup>, Prostate Cancer Prevention Trial (PCPT)<sup>28</sup>, Physicians' Health Study (PHS)<sup>29</sup>, Prostate, Lung, Colorectal and Ovarian Cancer Screening Trial (PLCO)<sup>30,31</sup>, Rancho Bernardo Study (RBS)<sup>32</sup>, and UK Biobank<sup>33-35</sup>.

The characteristics of these studies in the collaborative analyses are found in their original publications and are summarised in Supplementary Table 1. Most of the studies are case-control studies nested within traditional prospective cohort studies, with some variation in the case mix of these studies according to the prevalence of prostate-specific antigen (PSA) testing within that population during follow-up. For example, there is a generally higher proportion of early stage and low-grade cases in studies from the USA, where there have been relatively high levels of PSA-testing since the mid-1990s, than in studies in European populations where PSA-testing has only more recently started to become common. Two studies (PCPT and PLCO) are observational investigations using data from trials that included organised screening for prostate cancer. In these trials, men with a raised PSA or abnormal digital rectal examination at recruitment-screening were excluded, and the eligible cases were diagnosed during subsequent follow-up (for PCPT the majority being diagnosed at 4 and 7 years after recruitment), with most cases being detected either through PSA-screening (PLCO) or by routine end of study biopsy (PCPT).

Of the randomised trials, data were available for participants in both the intervention and placebo arm in ATBC, CARET, HHS, and PHS. Assay data were only available in the screening arm of the PLCO trial, and the placebo arm in PCPT (as the intervention arm was designed to alter prostate hormone concentrations)<sup>28,36</sup>. Five studies were cohort or case-cohort analyses (BLSA, HIMS, MCCS, MMAS and UK Biobank), in which hormone concentrations had been measured from stored serum from all, or a subset, of the cohort. To apply a consistent statistical approach across all studies, the cases from the case-cohort studies were matched to up to four participants who were free of prostate cancer at the age at diagnosis of the case, based on our minimal matching criteria (Supplementary Table 2). Some studies used density sample, meaning that an individual could appear more than once in a data file.

Principal investigators were asked to provide data on prostate cancer case or noncase status, and if applicable, a matched-set identifier, as well as participant and tumour characteristics, and prostate cancer mortality. Individual participant data were also contributed for participant characteristics including age, height, weight, smoking status, alcohol consumption, marital status, education achievement, racial/ethnic group, diabetes status, and PSA and other biomarker concentrations at blood collection (where available). Endogenous hormone concentrations requested included testosterone, sex hormone-binding globulin (SHBG), insulin-like growth factor-I (IGF-I), IGF-II, insulin-like growth factor binding proteins (IGFBP-1,-2,-3) and a number of other selected hormones and nutritional biomarkers. Collaborators also provided information on assay and time and date of blood collection. Information was requested about prostate cancer included date of diagnosis and stage and grade of disease, as well as prostate cancer mortality. Men were excluded from the analyses if data were missing for date of birth, blood collection, or diagnosis (for cases) or if they were known to be receiving androgen therapy at blood collection.

## Data Processing

Aggressive prostate cancer was categorised as “no” for non-metastatic and Gleason grade <8, and “yes” for any of the following: disease metastases (M1), Gleason score 8+ (stage and grade as recorded at diagnosis), prostate cancer death (defined as death from prostate cancer), or prostate-specific antigen (PSA) >100 ng/mL. In blood-based analyses, non-differentiated tumours were additionally classified as aggressive when Gleason score were not available, and PSA >100 ng/mL either at diagnosis or at blood collection. Prostate cancer was defined as low grade if the Gleason score was <7 or equivalent (i.e. extent of differentiation good, moderate), medium grade if Gleason score was 7 (i.e. poorly differentiated), and high grade if the Gleason score was ≥8 or equivalent (i.e. undifferentiated), or grade “unknown” otherwise.

Cases were defined as being early stage if they were tumor–node–metastasis (TNM) stage <T2 with no reported lymph node involvement or metastases or stage I; other localized stage if they were TNM stage T2 with no reported lymph node involvement or metastases, stage II, or equivalent (i.e. a tumor that does not extend beyond the prostate capsule); advanced stage if they were TNM stage T3 or T4 and/or N1+ and/or M1, stage III–IV, or equivalent (i.e. a tumor extending beyond the prostate capsule and/or lymph node involvement and/or distant metastases); or stage unknown. Early-onset prostate cancer was defined as aged ≤55 years at diagnosis. Disease subgroup definitions were the same for blood-based and genetic analyses.

## Statistical analyses

Conditional logistic regression was used to calculate the odds of prostate cancer diagnosis by hormone concentration. Analyses were conditioned on the matching variables and adjusted for age at blood collection (continuous), BMI (<25, 25-27.4, 27.5-29.9, 30+ kg/m<sup>2</sup>, unknown (3.0%)), height (<171, 171-175, 176-180, 180+ cm, unknown (3.0%)), smoking status (never, current, previous, unknown (4.3%)), usual alcohol consumption (none, 1-9, 10-19, 20-39, 40+ g/day, unknown (17.3%)), racial/ethnic group (white, black, East Asian, other, unknown (0.8%)), education status (<secondary/high school, secondary/high school, university+, unknown (24.3%)), married/cohabiting (yes, no, unknown (62.2%)), diabetes status (yes, no, unknown (14.5%)).

To account for any systematic differences between the studies in assay methods and blood sample types, biomarkers were standardised by study and entered into the model as a continuous variable. In categorical analyses, biomarkers were categorised into study-specific fifths with cut-points determined in the controls<sup>37</sup>.

## Further analyses

Tests for heterogeneity for case-defined factors were obtained by fitting separate models for each subgroup and assuming independence of the ORs using a method analogous to a meta-analysis. Tests for heterogeneity for non-case defined factors were assessed with a  $\chi^2$ -test of interaction between subgroup and the continuous exposure variable. For associations with overall prostate cancer diagnosis, subgroup categories were defined as follows: aggressive disease (yes, no), age at diagnosis (≤55, 56+ years), prostate cancer death (yes), stage (localized, other localized, advanced), grade (low, medium, high), time to diagnosis (<1, 1-2, 3-6, 7-9, 10+ years), year of diagnosis (pre 1990, 1990-1994, 1995 onwards), age at blood draw (≤55, 55-59, 60-64, 65-69, 70+ years), BMI (<25, 25-29.9, 30+ kg/m<sup>2</sup>), smoking status (never, ex, current), alcohol consumption (none, 1-9, 10+ g ethanol/day), PSA at blood collection (<2, 2-2.9, 3+ ng/mL), time of blood collection (morning, afternoon), racial/ethnic group (white, other), education status (no degree, degree), currently married/cohabiting (yes, no), diabetes status (yes, no).

For aggressive prostate cancer diagnosis, subgroups were: age at diagnosis (≤55, 56+ years), prostate cancer death (yes), stage (localized/other localized, advanced), grade (low/medium, high), time to diagnosis (<1, 1-4, 5+ years), year of diagnosis (pre 1990, 1990-1994, 1995 onwards), age at blood draw (<60, 60-69, 70+ years), BMI (<25, 25-29.9, 30+ kg/m<sup>2</sup>), smoking status (never, ex, current), alcohol consumption (none, 1-9; 10+ g ethanol/day), PSA at blood collection (<2, 2-2.9, 3+ ng/mL), time of blood collection (morning, afternoon), racial/ethnic group (white, other), education status (no degree, degree), currently married/cohabiting (yes, no), diabetes status (yes, no), overnight fast (no, yes). Subgroups were defined *a priori* based on the availability of data and previous analyses using this dataset<sup>38,39</sup>. To further investigate the apparent heterogeneity by age at blood collection, we examined the associations of free testosterone with overall and aggressive prostate cancer in fifths, stratified by age at blood collection (<60; 60+ years).

For each biomarker, heterogeneity in linear trends of the biomarkers and aggressive and overall prostate cancer between studies was assessed by comparing the  $\chi^2$  values for models with and without a (study) × (linear trend) interaction term.

This was tested across between all studies as well as in studies which included organised screening in their study design (PCPT and PLCO).

We also investigated associations in models conditioned on the matching variables but not further adjusted and associations in study-specific tenths. For comparison with previous analyses using the EHNBPCCG, estimates for trend were also defined using the study-specific fifths of the biomarker concentrations scored as 0, 0.25, 0.5, 0.75, and 1 and entered into the model as a continuous variable, therefore a unit increase in this variable can be taken to represent an 80 percentile increase in the biomarker study-specific concentration.

Associations with prostate cancer were also examined following mutual adjustment for the other analytes (IGF-I-2, IGFBP-1-3, free and total testosterone and SHBG), which were standardised by study (continuous). We additionally tested for interaction between the biomarkers by study-specific median concentrations, using a  $\chi^2$ -test of interaction. Stratified analyses and associations in tenths were not investigated for early-onset disease due to the limited number of cases.

## ii. Mendelian randomization analyses

### Genetic instruments for hormone concentrations

Summary GWAS results for free and total testosterone and SHBG in men, using the UK Biobank resource, were extracted from a published analysis (up to 194,453 men)<sup>40</sup>. For free and total testosterone, the investigators used the inverse normal transformation of rank and adjusted for 10 principal components, fasting time, age, centre, chip/release of genetic data. For SHBG, the investigators used the natural log transformation and adjusted for 10 principal components, age, BMI, batch, dilution. To prevent possible issues related to collider bias<sup>41</sup>, for MR analyses genetic instruments were identified using the BMI-adjusted estimates, but weights were assigned using the GWAS results that were not adjusted for BMI, as described previously<sup>40</sup>.

UK Biobank genotyping details are reported elsewhere<sup>42</sup>. To ensure SNPs were independent, SNPs were pruned by a linkage disequilibrium (LD) threshold of  $r^2 < 0.001$ , based on the lowest p-value.

### Genetic associations with prostate cancer

For each of the SNPs included as an instrument for free testosterone, total testosterone and SHBG, we obtained the association with prostate cancer from fixed-effects meta-analyses based on individuals of European ancestry in the PRACTICAL (Prostate Cancer Association Group to Investigate Cancer-Associated Alterations in the Genome) (including GAME-ON/ELLIPSE (Genetic Associations and Mechanisms in Oncology, Elucidating Loci Involved in Prostate Cancer Susceptibility))<sup>43, 44</sup>; genetic data for UK Biobank participants were not currently included in this dataset. Associations with overall prostate cancer were generated from 79,148 prostate cancer cases and 61,106 controls, aggressive disease from 15,167 aggressive cases and 58,308 controls, and early-onset disease from 6,988 cases and 44,256 controls<sup>43, 44</sup>.

### Statistical analysis

We used a 2-sample MR approach to estimate free and total testosterone, and SHBG associations with overall, aggressive, and early-onset prostate cancer risk, using UK Biobank as our source of genetic instruments for hormones and PRACTICAL for genetic outcome analyses.

The MR estimation for hormones was conducted using the multiplicative random effects inverse-variance weighted (IVW) method<sup>45</sup>. We additionally calculated the  $I^2$  statistic to assess measurement error in SNP-exposure associations<sup>46</sup> and Cochran's Q statistic for heterogeneity between the MR estimates for each SNP<sup>47</sup>. PhenoScanner was used to assess pleiotropy of the genetic instruments<sup>1</sup>. As sensitivity analyses, we used the MR residual sum and outlier (MR-PRESSO) and MR robust adjusted profile score (MR-RAPS) to investigate the role of SNP outliers<sup>48</sup>, and the weighted median, MR-Egger and the MR-Egger intercept to investigate horizontal pleiotropy<sup>49, 50</sup>. We also used the contamination mixture method, which assumes a normal distribution of valid instruments around the true causal value, and invalid instruments are normally distributed around zero in order to account for potentially pleiotropic variants<sup>51</sup>.

For SHBG, we additionally investigated associations of the *cis*-SNP with prostate cancer risk, defined as the lead SNP identified from the exposure dataset in the SHBG gene-coding region. This *cis*-SNP may be less likely to be affected by horizontal pleiotropy than *trans*-SNPs<sup>52</sup>. Associations of this single SNP with prostate cancer were assessed using the Wald ratio.

### Statistical software

Blood-based analyses were performed using Stata version 14.1 (Stata Corporation, College Station, TX, USA). MR analyses were performed using the *TwoSampleMR* R package (version 0.4.2)<sup>53</sup> and figures were plotted in R version 3.6.3. All tests of significance were two-sided, and P-values  $<0.05$  were considered statistically significant.

**Supplementary Table 1: Sample populations, recruitment and case ascertainment methods**

| Study        | Sample population                                                                                                | Location  | Recruitment period                       | Age at blood collection (years) | Prostate cancer ascertainment method                                                                                          |
|--------------|------------------------------------------------------------------------------------------------------------------|-----------|------------------------------------------|---------------------------------|-------------------------------------------------------------------------------------------------------------------------------|
| ATBC         | Randomised trial of $\alpha$ -tocopherol and $\beta$ -carotene among smokers                                     | Finland   | 1985-1988                                | 50-69                           | Cancer registry linkage, central review of medical records and specimens                                                      |
| BLSA         | Prospective cohort study of the physiology of aging                                                              | USA       | 1958-onward                              | 30-84                           | Self-report with medical record review                                                                                        |
| CARET        | Randomised controlled trial of $\beta$ -carotene and retinyl palmitate in heavy smokers and asbestos workers     | USA       | 1987-1998                                | 47-77                           | Self-report with medical record review                                                                                        |
| CHDS         | Prospective cohort study                                                                                         | USA       | 1959-1966                                | 20-55                           | Cancer registry linkage                                                                                                       |
| CLUE         | Prospective cohort study                                                                                         | USA       | 1974-onward                              | 44-87                           | Cancer registry linkage                                                                                                       |
| EPIC         | Prospective cohort study                                                                                         | Europe    | 1991-2001                                | 43-76                           | Cancer registry linkage; health insurance record linkage; self-report with medical record review                              |
| FMC          | Prospective cohort study                                                                                         | Finland   | 1966-1972                                | 17-80                           | Cancer registry linkage                                                                                                       |
| HHS NBSBWG   | Randomised controlled trial of gemfibrozil                                                                       | Finland   | 1981-1982                                | 40-56                           | Cancer registry linkage                                                                                                       |
| HIMS         | Population-based cohort study                                                                                    | Australia | 1996-1999 (Blood collection 2001-2004)   | 71-87                           | Cancer registry linkage                                                                                                       |
| HPFS         | Cohort study of male dentists, optometrists, osteopathic physicians, podiatrists, pharmacists, and veterinarians | USA       | 1986                                     | 46-87                           | Self-report with medical record review                                                                                        |
| JACC         | Prospective cohort study                                                                                         | Japan     | 1988-1990                                | 57-85                           | Cancer registry linkage                                                                                                       |
| JHCS         | Prospective cohort study                                                                                         | USA       | 1971-1975                                | 52-74                           | Surveillance of all general hospitals on Oahu, confirmed by biopsy/surgery and cancer registry linkage                        |
| JPHC         | Prospective cohort study                                                                                         | Japan     | Cohort 1)1990-1992<br>Cohort 2)1993-1995 | 41-71                           | Active patient notification from major local hospitals in the study area and linkage with population-based cancer registries. |
| Janus        | Prospective cohort study                                                                                         | Norway    | 1973-onward                              | 33-61                           | Cancer registry linkage                                                                                                       |
| Janus NBSBWG | Prospective cohort study                                                                                         | Norway    | 1973-onward                              | 33-61                           | Cancer registry linkage                                                                                                       |
| MCCS         | Prospective cohort study                                                                                         | Australia | 1990-1994                                | 40-72                           | Cancer registry linkage                                                                                                       |
| MEC          | Prospective cohort study                                                                                         | USA       | 1993-1996 (Blood collection 2001-2006)   | 48-85                           | Cancer registry linkage                                                                                                       |
| MMAS         | Prospective cohort study of the physiology of aging                                                              | USA       | 1987-1989                                | 41-70                           | Cancer registry linkage                                                                                                       |
| NSHDC        | Combination of a population-based intervention study to decrease cardiovascular disease and a                    | Sweden    | 1985-onward                              | 39-61                           | Cancer registry linkage                                                                                                       |

|            |                                                                                                                   |     |             |       |                                                                                                                                                                                       |
|------------|-------------------------------------------------------------------------------------------------------------------|-----|-------------|-------|---------------------------------------------------------------------------------------------------------------------------------------------------------------------------------------|
|            | population-based monitoring study of cardiovascular disease                                                       |     |             |       |                                                                                                                                                                                       |
| PCPT       | Randomised, placebo-controlled trial of finasteride and prostate cancer                                           | USA | 1994-1997   | 55-83 | Diagnosed as part of trial protocol. Annual digital rectal examinations and PSA measurements. Biopsy if abnormal DRE or reported PSA level > 4.0 ng per. End-of-study prostate biopsy |
| PHS        | Randomised trial of aspirin and $\beta$ -carotene among physicians                                                | USA | 1982-onward | 41-78 | Self-report with medical record review                                                                                                                                                |
| PLCO       | Randomised controlled multicentre trial for early detection of cancer of the prostate, lung, colorectum and ovary | USA | 1993-2001   | 55-74 | Medical and pathology record review after screening and self-report with medical record review                                                                                        |
| RBS        | Prospective cohort study                                                                                          | USA | 1984-1986   | 47-86 | Self-report or death certificate, cancer deaths after 1988 were confirmed by the California Cancer Registry                                                                           |
| UK Biobank | Prospective cohort study                                                                                          | UK  | 2006-2010   | 40-69 | Cancer registry linkage                                                                                                                                                               |

Abbreviations: ATBC=The Alpha-Tocopherol, Beta-Carotene Cancer Prevention Study; BLSA= The Baltimore Longitudinal Study of Aging; CARET =The Carotene and Retinol Efficacy Trial; CHDS=Child Health and Development Studies; CLUE=Give Us a Clue to Cancer and Heart Disease; DRE= digital rectal exam; EPIC=European Prospective Investigation into Cancer and Nutrition; FMC=Finnish Mobile Clinic Health Examination Survey; HHS= Helsinki Heart Study; HIMS=Health In Men Study; HPFS= Health Professionals Follow-up Study; JACC=Japan Collaborative Cohort Study; JPHC= Japan Public Health Center-based Prospective Study; JHCS= Japan-Hawaii Cancer Study; MCCS=Melbourne Collaborative Cohort Study; MEC= Multiethnic Cohort Study of Diet and Cancer; MMAS=Massachusetts Male Aging Study; NBSBWG=Nordic Biological Specimen Biobank Working Group; NSHDC=Northern Sweden Health and Disease Cohort; PCPT= Prostate Cancer Prevention Trial; PHS=Physicians' Health Study; PLCO= Prostate, Lung, Colorectal and Ovarian Cancer Screening Trial; PSA=prostate-specific antigen; RBS=Rancho Bernardo Study



**Supplementary Table 2: Criteria used by individual studies to match case patients and control subjects**

| Study           | Case:control ratio               | Age at recruitment   | Date of recruitment                                       | Time of blood draw                                       | Other matching criteria                                                                                                                 |
|-----------------|----------------------------------|----------------------|-----------------------------------------------------------|----------------------------------------------------------|-----------------------------------------------------------------------------------------------------------------------------------------|
| ATBC            | 1:2                              | ±1 y                 | ±28 days                                                  |                                                          | Trial intervention group, study centre                                                                                                  |
| BLSA*           | 1:1                              | ±6 mo                |                                                           |                                                          | Follow-up time                                                                                                                          |
| CARET           | 1:1                              | ±5 y                 | Month from enrolment to blood draw, year of randomisation | ±2 h                                                     | Study centre, ethnicity                                                                                                                 |
| CHDS            | 1:2                              | ±1 y                 |                                                           |                                                          | Ethnicity                                                                                                                               |
| CLUE            | 1:2                              | ±1 y                 | ±3 weeks                                                  |                                                          | Ethnicity                                                                                                                               |
| EPIC phases 1-4 | 1:1 except for Umea centre (1:2) | ±6 mo                |                                                           | ±1 h                                                     | Recruitment centre, time between blood draw and last food or drink consumption, follow-up time                                          |
| EPIC- Norfolk   | 1:2                              | ±3 y                 | ±3 mo                                                     |                                                          | Follow-up time                                                                                                                          |
| FMC             | 1:2                              | Nearest available    | ±1 mo                                                     |                                                          | Municipality                                                                                                                            |
| HHS NBSBWG      | 1:4                              | ±2 y                 | ±2 mo                                                     |                                                          | Study centre                                                                                                                            |
| HIMS*           | 1:4                              | ±1 y                 |                                                           |                                                          | ±1 y date of blood collection<br><br>Fasting status, diabetes, controls must be 'alive and at risk' beyond the case's date of diagnosis |
| HPFS            | 1:1                              | Year of birth ±1 y   | Exact year                                                | Midnight–9 am; 9 am–12 pm; 12 pm–4 pm; and 4 pm–midnight | PSA test before blood draw, season. control subjects had at least one PSA test after the date of blood draw                             |
| JACC            | 1:3                              | As close as possible |                                                           |                                                          | Recruitment area                                                                                                                        |
| JHCS            | 1:1                              | Same age             | Same month or year                                        | Same hour                                                |                                                                                                                                         |
| JPHC            | 1:2                              | ±3 y                 | ±60 days                                                  | ±3 h                                                     | Municipality, duration of fasting at blood collection (±3 h)                                                                            |
| Janus           | 1:3                              | ±1 y                 | ±6 mo                                                     |                                                          |                                                                                                                                         |
| Janus NBSBWG    | 1:4                              | ±2 y                 | ±6 mo                                                     |                                                          | County of residence and Red Cross blood donor status (Oslo)                                                                             |
| MCCS*           | 1:3                              | ±5 y                 | ±2 y                                                      |                                                          | Assay batch, country of birth                                                                                                           |
| MEC             | 1:2                              | ±1 y                 | ±6 mo                                                     | ±2 h                                                     | Geographic site, ethnicity, fasting status (<6, 6-7, 8-9, 10+ hours)                                                                    |
| MMAS*           | 1:4                              | ±2 y                 | ± 2 y                                                     |                                                          | Ethnicity                                                                                                                               |
| NSHDC           | 1:2                              | ±6 mo                | ±2 mo                                                     |                                                          | County of residency                                                                                                                     |
| PCPT            | 1:1                              | As close as possible | As close as possible                                      |                                                          | PCPT treatment arm (placebo only). All non-whites controls were sampled and then backfilled with                                        |

|             |     |        |            |      |                                                                                                                                         |
|-------------|-----|--------|------------|------|-----------------------------------------------------------------------------------------------------------------------------------------|
|             |     |        |            |      | whites to achieve frequency matching on age and family history. Controls were required to have completed end of study biopsy procedure. |
| PHS         | 1:2 | ±1 y   |            |      | Had not had a total or partial prostatectomy and smoking status                                                                         |
| PLCO        | 1:1 | ±5 y   | Exact year |      | Follow-up time                                                                                                                          |
| RBS         | 1:3 | ±2 y   | ±18 mo     | ±2 h | Race and smoking status                                                                                                                 |
| UK Biobank* | 1:4 | ±18 mo | ±18 mo     | ±2 h | No more than 2 hours difference in time since last meal, ethnicity                                                                      |

\*Used a case-cohort design that was subsequently converted into nested case-control design.

Abbreviations: ATBC=The Alpha-Tocopherol, Beta-Carotene Cancer Prevention Study; BLSA= The Baltimore Longitudinal Study of Aging; CARET =The Carotene and Retinol Efficacy Trial; CHDS=Child Health and Development Studies; CLUE=Give Us a Clue to Cancer and Heart Disease; DRE= digital rectal exam; EPIC=European Prospective Investigation into Cancer and Nutrition; FMC= Finnish Mobile Clinic Health Examination Survey; HHS= Helsinki Heart Study; HIMS=Health In Men Study; HPFS= Health Professionals Follow-up Study; JACC= Japan Collaborative Cohort Study; JPHC= Japan Public Health Center-based Prospective Study; JHCS= Japan-Hawaii Cancer Study; MCCS=Melbourne Collaborative Cohort Study; MEC= Multiethnic Cohort Study of Diet and Cancer; MMAS=Massachusetts Male Aging Study; NBSBWG=Nordic Biological Specimen Biobank Working Group; NSHDC=Northern Sweden Health and Disease Cohort; PCPT= Prostate Cancer Prevention Trial; PHS=Physicians' Health Study; PLCO= Prostate, Lung, Colorectal and Ovarian Cancer Screening Trial; PSA=prostate-specific antigen; RBS=Rancho Bernardo Study.

**Supplementary Table 3: Assay methods and geometric mean biomarker concentrations by study**

| Study          | Testosterone (nmol/L) |          |                        | SHBG (nmol/L) |                  |                       | Estimated free testosterone (pmol/L) |          |
|----------------|-----------------------|----------|------------------------|---------------|------------------|-----------------------|--------------------------------------|----------|
|                | Method                | CV %     | Mean (SD)              | Method        | CV %             | Mean (SD)             | Mean (SD)                            |          |
| ATBC           | Case                  | E RIA    | 5.5 <sup>†</sup>       | 21(7.5)       | IRMA             | 4.2 <sup>†</sup>      | 87(29)                               | 228(62)  |
|                | Control               |          |                        | 21(6.5)       |                  |                       | 90(31)                               | 225(55)  |
| BLSA           | Case                  | NE RIA   | 3.3-6.4 <sup>§</sup>   | 15(3.9)       | NE RIA           | 1.8-22 <sup>§</sup>   | 80(25)                               | 178(56)  |
|                | Control               |          |                        | 16(3.7)       |                  |                       | 85(27)                               | 171(52)  |
| CARET          | Case                  | E RIA    | 1-12 <sup>§</sup>      | 14(5)         | IRMA             | 2-7 <sup>§</sup>      | 30(13)                               | 313(88)  |
|                | Control               |          |                        | 15(5.6)       |                  |                       | 30(13)                               | 331(101) |
| CHDS           | Case                  | E RIA    | 9-11 <sup>‡</sup>      | 23(8.2)       | IA               | 4-6 <sup>‡</sup>      | 35(14)                               | 504(168) |
|                | Control               |          |                        | 24(8.5)       |                  |                       | 36(15)                               | 505(174) |
| CLUE           | Case                  | RIA      | 8*                     | 16(6.9)       | RIA              | N/A                   | 48(34)                               |          |
|                | Control               |          |                        | 16(8.9)       |                  |                       | 47(24)                               |          |
| EPIC Phase 1   | Case                  | NE RIA   | 10.8-14.8 <sup>†</sup> | 17(7.4)       | IRMA             | 7.7-12.2 <sup>†</sup> | 45(20)                               | 309(138) |
|                | Control               |          |                        | 17(7)         |                  |                       | 47(21)                               | 294(123) |
| EPIC Phase 2   | Case                  | ECIA     | 2.7-6.1 <sup>‡</sup>   | 16(5.8)       | ECIA             | 2.0-2.7 <sup>‡</sup>  | 54(22)                               | 244(73)  |
|                | Control               |          |                        | 16(5.7)       |                  |                       | 56(24)                               | 239(68)  |
| EPIC Phase 3/4 | Case                  | ECIA     | 1.8-9.3 <sup>‡</sup>   | 16(5.5)       | ECIA             | 1.5-3.4 <sup>‡</sup>  | 50(20)                               | 259(77)  |
|                | Control               |          |                        | 16(5.9)       |                  |                       | 52(22)                               | 255(77)  |
| EPIC Norfolk   | Case                  | ECIA     | 7.1-12.0 <sup>§</sup>  | 16(4.9)       | ECIA             | 4.6-5.7 <sup>§</sup>  | 43(14)                               | 295(86)  |
|                | Control               |          |                        | 17(5.7)       |                  |                       | 47(19)                               | 296(91)  |
| FMC            | Case                  | NE RIA   | 4.5-7.2 <sup>‡</sup>   | 25(9.9)       | IMF              | 6.6-8.7 <sup>‡</sup>  | 56(24)                               | 408(140) |
|                | Control               |          |                        | 25(9.7)       |                  |                       | 56(25)                               | 406(163) |
| HHS            | Case                  | NE RIA   | 5.5-13 <sup>§</sup>    | 21(5.9)       | IMF              | 1.3-10.1 <sup>§</sup> | 57(28)                               | 328(91)  |
|                | Control               |          |                        | 21(6.7)       |                  |                       | 56(27)                               | 328(102) |
| HIMS           | Case                  | LC-MS/MS | <6 <sup>‡</sup>        | 13(4.4)       | IA               | <7 <sup>‡</sup>       | 41(15)                               | 232(67)  |
|                | Control               |          |                        | 13(4.9)       |                  |                       | 43(16)                               | 228(77)  |
| HPFS           | Case                  | ECIA     | ≤5.2 <sup>†¶</sup>     | 17(6.2)       | IRMA             | ≤11.5 <sup>†¶</sup>   | 74(51)                               | 242(143) |
|                | Control               |          |                        | 17(5.9)       |                  |                       | 74(51)                               | 238(137) |
| JACC           | Case                  | NE RIA   | 5-12*                  | 17(4.6)       | IRMA             | 5.6-6.9*              | 44(18)                               | 300(86)  |
|                | Control               |          |                        | 16(4.7)       |                  |                       | 47(16)                               | 278(78)  |
| Janus          | Case                  | E RIA    | 5-15 <sup>§</sup>      | 20(6.1)       |                  |                       |                                      |          |
|                | Control               |          |                        | 20(7.5)       |                  |                       |                                      |          |
| Janus NBSBWG   | Case                  | E RIA    | 5.5-13.0 <sup>§</sup>  | 23(7)         | IMF              | 5-15 <sup>§</sup>     | 52(23)                               | 395(134) |
|                | Control               |          |                        | 24(8.2)       |                  |                       | 54(26)                               | 405(158) |
| JHCS           | Case                  | E RIA    | 5-15 <sup>§</sup>      | 19(7.4)       | Precipitation    | 5-15 <sup>§</sup>     | 39(12)                               |          |
|                | Control               |          |                        | 19(7.9)       |                  |                       | 39(13)                               |          |
| JPHC           | Case                  | ECIA     | 1-3 <sup>§</sup>       | 16(5.4)       | IRMA             | 2-8 <sup>§</sup>      | 50(18)                               | 263(73)  |
|                | Control               |          |                        | 17(5.5)       |                  |                       | 50(17)                               | 266(78)  |
| MCCS           | Case                  | ECIA     | 1.6 <sup>†</sup>       | 16(5.1)       | IA               | 6 <sup>†</sup>        | 40(15)                               | 304(84)  |
|                | Control               |          |                        | 16(5.6)       |                  |                       | 39(15)                               | 310(96)  |
| MEC            | Case                  | E RIA    | 3.5 <sup>†</sup>       | 20(8)         | ECIA             | 3 <sup>†</sup>        | 38(16)                               | 393(137) |
|                | Control               |          |                        | 20(7.6)       |                  |                       | 39(16)                               | 390(136) |
| MMAS           | Case                  | E RIA    | 4.6-7.2 <sup>§</sup>   | 18(5.9)       | Filtration assay | 8-10.9 <sup>§</sup>   | 34(18)                               | 385(151) |
|                | Control               |          |                        | 17(5.8)       |                  |                       | 34(16)                               | 377(138) |
| NSHDC          | Case                  | N/S      |                        | 22(8.1)       | IRMA             | N/S                   | 46(20)                               | 395(161) |
|                | Control               |          |                        | 21(9.3)       |                  |                       | 45(20)                               | 390(169) |
| PCPT           | Case                  | ECIA     | 7.6-11.9 <sup>§</sup>  | 13(4.7)       | ECIA             | 5.2-12.2 <sup>§</sup> | 39(15)                               | 245(74)  |
|                | Control               |          |                        | 13(4.5)       |                  |                       | 39(16)                               | 242(71)  |
| PHS            | Case                  | NE RIA   | 8.7 <sup>†</sup>       | 17(9.1)       | IRMA             | 8.9 <sup>†</sup>      | 23(12)                               | 455(320) |
|                | Control               |          |                        | 17(6.2)       |                  |                       | 24(13)                               | 433(163) |
| PLCO           | Case                  | NE RIA   | 14*                    | 18(7.9)       | IRMA             | 18*                   | 48(24)                               | 299(119) |
|                | Control               |          |                        | 18(8.7)       |                  |                       | 49(23)                               | 292(122) |
| RBS            | Case                  | E RIA    | 4.1-10 <sup>§</sup>    | 11(4)         |                  |                       |                                      |          |
|                | Control               |          |                        | 11(4.1)       |                  |                       |                                      |          |
| UK Biobank     | Case                  | ECIA     | 3.7-8.3 <sup>§</sup>   | 12(3.5)       | ECIA             | 5.2-5.7 <sup>§</sup>  | 42(16)                               | 209(58)  |
|                | Control               |          |                        | 12(3.8)       |                  |                       | 43(18)                               | 208(61)  |

Abbreviations: ATBC=The Alpha-Tocopherol, Beta-Carotene Cancer Prevention Study; BLSA= The Baltimore Longitudinal Study of Aging; CARET =The Carotene and Retinol Efficacy Trial; CHDS=Child Health and Development Studies; CIA=chemiluminescence immunoassay; CLUE=Give Us a Clue to Cancer and Heart Disease; CV=coefficient of variation; E RIA=extraction radioimmunoassay; ECIA= electrochemiluminescence immunoassay; EPIC=European Prospective Investigation into Cancer and Nutrition; FMC= Finnish Mobile Clinic Health Examination Survey; HHS=Helsinki Heart Study; HIMS=Health In Men Study; HPFS= Health Professionals Follow-up Study; IA=immunoassay; IMF=immunofluorometry; IRMA= immunoradiometric assay; JACC= Japan Collaborative Cohort Study; JPHC= Japan Public Health Center-based Prospective Study; JHCS= Japan-Hawaii Cancer Study; LC-MS/MS= Liquid chromatography-tandem mass spectrometry; MCCS=Melbourne Collaborative Cohort Study; MEC=Multiethnic Cohort Study of Diet and Cancer; MMAS=Massachusetts Male Aging Study; NBSBWG=Nordic Biological Specimen Biobank Working Group; NE RIA=non-extraction radioimmunoassay; NSHDC=Northern Sweden Health and Disease Cohort; PCPT= Prostate Cancer Prevention Trial; PHS=Physicians' Health Study; PLCO= Prostate, Lung, Colorectal and Ovarian Cancer Screening Trial; RBS=Rancho Bernardo Study; SD=standard deviation.

\* Not specified

† Intra-assay

‡ Inter-assay

§ Intra-and inter-assay range

**Supplementary Table 4: Prostate cancer characteristics in participating EHNBPCCG studies**

| Study          | Years blood collection to diagnosis, % |            | Age at diagnosis, % |             | Year of diagnosis, % |              | Aggressive disease*, % |           |                      | Disease stage†, % |          |                      | Disease grade‡, % |          |                      | Prostate cancer death, % |
|----------------|----------------------------------------|------------|---------------------|-------------|----------------------|--------------|------------------------|-----------|----------------------|-------------------|----------|----------------------|-------------------|----------|----------------------|--------------------------|
|                | <5 years                               | 5+ years   | ≤55 years           |             | pre 1995             | 1995 onwards | No                     | Yes       | Unknown <sup>a</sup> | Localized         | Advanced | Unknown <sup>a</sup> | Low               | High     | Unknown <sup>a</sup> | Yes                      |
|                |                                        |            | >55 years           | years       |                      |              |                        |           |                      |                   |          |                      |                   |          |                      |                          |
| ATBC           | 84 (72)                                | 32 (28)    | 6 (5)               | 110 (95)    | 116 (100)            | 0 (0)        | 49 (43)                | 66 (57)   | 1 (1)                | 71 (61)           | 45 (39)  | 0 (0)                | 90 (80)           | 22 (20)  | 4 (3)                | 59 (51)                  |
| BLSA           | 17 (15)                                | 95 (85)    | 4 (4)               | 108 (96)    | 76 (68)              | 36 (32)      | 38 (72)                | 15 (28)   | 59 (53)              | 42 (79)           | 11 (21)  | 59 (53)              | 77 (87)           | 12 (13)  | 23 (21)              | 18 (16)                  |
| CARET          | 247 (83)                               | 51 (17)    | 12 (4)              | 286 (96)    | 132 (44)             | 166 (56)     | 200 (76)               | 64 (24)   | 34 (11)              | 189 (72)          | 75 (28)  | 34 (11)              | 246 (88)          | 34 (12)  | 18 (6)               | 33 (11)                  |
| CHDS           | 0 (0)                                  | 322 (100)  | 21 (7)              | 301 (93)    | 142 (44)             | 180 (56)     | 249 (91)               | 26 (9)    | 47 (15)              | 229 (80)          | 57 (20)  | 36 (11)              | 299 (99)          | 4 (1)    | 19 (6)               | 32 (10)                  |
| CLUE           | 37 (40)                                | 56 (60)    | 1 (1)               | 92 (99)     | 93 (100)             | 0 (0)        | 37 (51)                | 35 (49)   | 21 (23)              | 46 (73)           | 17 (27)  | 30 (32)              | 65 (89)           | 8 (11)   | 20 (22)              | 29 (31)                  |
| EPIC phase 1   | 471 (77)                               | 141 (23)   | 38 (6)              | 574 (94)    | 6 (1)                | 606 (99)     | 239 (57)               | 180 (43)  | 193 (32)             | 291 (69)          | 130 (31) | 191 (31)             | 402 (89)          | 51 (11)  | 159 (26)             | 141 (23)                 |
| EPIC phase 2   | 75 (13)                                | 497 (87)   | 28 (5)              | 544 (95)    | 0 (0)                | 572 (100)    | 260 (68)               | 124 (32)  | 188 (33)             | 318 (76)          | 102 (24) | 152 (27)             | 371 (88)          | 50 (12)  | 151 (26)             | 85 (14)                  |
| EPIC phase 3/4 | 15 (1)                                 | 1,588 (99) | 64 (4)              | 1,539 (96)  | 0 (0)                | 1,603 (100)  | 676 (70)               | 285 (30)  | 642 (40)             | 815 (76)          | 260 (24) | 528 (33)             | 972 (87)          | 140 (13) | 491 (31)             | 114 (7)                  |
| EPIC-Norfolk   | 10 (13)                                | 65 (87)    | 0 (0)               | 75 (100)    | 0 (0)                | 75 (100)     | 0 (0)                  | 33 (100)  | 41 (55)              | 52 (75)           | 17 (25)  | 6 (8)                | 5 (71)            | 2 (29)   | 68 (91)              | 28 (33)                  |
| FMC            | 22 (13)                                | 144 (87)   | 8 (5)               | 158 (95)    | 166 (100)            | 0 (0)        | 0 (0)                  | 57 (100)  | 109 (66)             | N/A               | N/A      | 166 (100)            | N/A               | N/A      | 166 (100)            | 70 (42)                  |
| HHS            |                                        |            |                     |             |                      |              |                        |           |                      |                   |          |                      |                   |          |                      |                          |
| NBSBWG         | 6 (7)                                  | 78 (93)    | 7 (8)               | 77 (92)     | 64 (76)              | 20 (24)      | 0 (0)                  | 25 (100)  | 59 (70)              | 41 (62)           | 25 (38)  | 18 (21)              | N/A               | N/A      | 84 (100)             | 0 (0)                    |
| HIMS           | 212 (66)                               | 109 (34)   | 0 (0)               | 321 (100)   | 0 (0)                | 321 (100)    | 0 (0)                  | 36 (100)  | 285 (89)             | N/A               | N/A      | 321 (100)            | N/A               | N/A      | 321 (100)            | 36 (11)                  |
| HPFS           | 564 (83)                               | 118 (17)   | 46 (7)              | 636 (93)    | 85 (12)              | 597 (88)     | 503 (83)               | 102 (17)  | 77 (11)              | 608 (95)          | 32 (5)   | 42 (6)               | 552 (91)          | 54 (9)   | 76 (11)              | 80 (12)                  |
| JACC           | 18 (45)                                | 22 (55)    | 0 (0)               | 40 (100)    | 22 (55)              | 18 (45)      | 0 (0)                  | 2 (100)   | 38 (95)              | N/A               | N/A      | 40 (100)             | N/A               | N/A      | 40 (100)             | 0 (0)                    |
| JHCS 1988      | 28 (29)                                | 70 (71)    | 1 (1)               | 97 (99)     | 98 (100)             | 0 (0)        | 0 (0)                  | 32 (100)  | 66 (67)              | 51 (53)           | 45 (47)  | 2 (2)                | N/A               | N/A      | 98 (100)             | 0 (0)                    |
| JHCS 1996      | 16 (12)                                | 122 (88)   | 0 (0)               | 138 (100)   | 138 (100)            | 0 (0)        | 0 (0)                  | 29 (100)  | 109 (79)             | 96 (70)           | 42 (30)  | 0 (0)                | N/A               | N/A      | 138 (100)            | 0 (0)                    |
| JPHC           | 39 (19)                                | 162 (81)   | 2 (1)               | 199 (99)    | 7 (3)                | 194 (97)     | 16 (23)                | 53 (77)   | 132 (66)             | 108 (72)          | 43 (28)  | 50 (25)              | 47 (76)           | 15 (24)  | 139 (69)             | 3 (1)                    |
| Janus          | 13 (22)                                | 47 (78)    | 1 (2)               | 59 (98)     | 60 (100)             | 0 (0)        | N/A                    | N/A       | 60 (100)             | N/A               | N/A      | 60 (100)             | N/A               | N/A      | 60 (100)             | 0 (0)                    |
| Janus          |                                        |            |                     |             |                      |              |                        |           |                      |                   |          |                      |                   |          |                      |                          |
| NBSBWG         | 17 (3)                                 | 520 (97)   | 50 (9)              | 487 (91)    | 445 (83)             | 92 (17)      | N/A                    | N/A       | 537 (100)            | N/A               | N/A      | 537 (100)            | N/A               | N/A      | 537 (100)            | 0 (0)                    |
| MCCS           | 229 (41)                               | 328 (59)   | 27 (5)              | 530 (95)    | 86 (15)              | 471 (85)     | 415 (76)               | 129 (24)  | 13 (2)               | 498 (91)          | 52 (9)   | 7 (1)                | 469 (86)          | 74 (14)  | 14 (3)               | 109 (18)                 |
| MEC            | 434 (94)                               | 30 (6)     | 6 (1)               | 458 (99)    | 0 (0)                | 464 (100)    | 0 (0)                  | 49 (100)  | 415 (89)             | N/A               | N/A      | 464 (100)            | 442 (100)         | 1 (0)    | 21 (5)               | 49 (11)                  |
| MMAS           | 32 (20)                                | 131 (80)   | 12 (7)              | 151 (93)    | 47 (29)              | 116 (71)     | N/A                    | N/A       | 163 (100)            | N/A               | N/A      | 163 (100)            | 86 (100)          | 0 (0)    | 77 (47)              | 3 (2)                    |
| NSHDC          | 141 (37)                               | 243 (63)   | 31 (8)              | 353 (92)    | 18 (5)               | 366 (95)     | 258 (77)               | 75 (23)   | 51 (13)              | 305 (80)          | 75 (20)  | 4 (1)                | 287 (90)          | 31 (10)  | 66 (17)              | 0 (0)                    |
| PCPT           | 238 (23)                               | 794 (77)   | 0 (0)               | 1,032 (100) | 4 (0)                | 1,028 (100)  | 929 (95)               | 53 (5)    | 50 (5)               | 988 (98)          | 17 (2)   | 27 (3)               | 958 (95)          | 49 (5)   | 25 (2)               | 4 (0)                    |
| PHS            | 66 (30)                                | 153 (70)   | 11 (5)              | 208 (95)    | 219 (100)            | 0 (0)        | 130 (63)               | 76 (37)   | 13 (6)               | 167 (78)          | 46 (22)  | 6 (3)                | 184 (91)          | 18 (9)   | 17 (8)               | 67 (30)                  |
| PLCO           | 648 (89)                               | 79 (11)    | 0 (0)               | 728 (100)   | 0 (0)                | 728 (100)    | 522 (89)               | 66 (11)   | 0 (0)                | 636 (89)          | 79 (11)  | 0 (0)                | 681 (95)          | 35 (5)   | 1 (0)                | 30 (4)                   |
| RBS            | 36 (35)                                | 68 (65)    | 1 (1)               | 103 (99)    | 64 (62)              | 40 (38)      | 0 (0)                  | 21 (100)  | 82 (80)              | N/A               | N/A      | 104 (100)            | N/A               | N/A      | 104 (100)            | 22 (21)                  |
| UK Biobank     | 3,707 (67)                             | 1,824 (33) | 252 (5)             | 5,279 (95)  | 0 (0)                | 5,531 (100)  | 0 (0)                  | 189 (100) | 5,342 (97)           | N/A               | N/A      | 5,531 (100)          | N/A               | N/A      | 5,531 (100)          | 313 (6)                  |

\*Aggressive disease was defined as Gleason Score 8+, death from prostate cancer, metastatic disease, or PSA>100 ng/mL. Non-aggressive disease is defined as Gleason score <8 and non-metastatic disease.

†Stage of disease was defined as follows: localised if TNM was T2 or lower with no reported lymph node involvement or metastases, stage II or lower, or equivalent (ie, a tumour that does not extend beyond the prostate capsule); advanced if TNM stage was T3 or T4 and/or N1+ and/or M1, stage III or IV, equivalent (ie, a tumour extending beyond the prostate capsule and/or lymph node involvement and/or distant metastases), or unknown.

‡Histological grade was categorised as low-intermediate grade (Gleason sum <8 or cases coded as well, moderately, or poorly differentiated), high grade (Gleason sum 8+ or cases coded as undifferentiated), or unknown.

<sup>a</sup>Percentage value is for those with known disease characteristics.

Abbreviations: ATBC=The Alpha-Tocopherol, Beta-Carotene Cancer Prevention Study; BLSA= The Baltimore Longitudinal Study of Aging; CARET =The Carotene and Retinol Efficacy Trial; CHDS=Child Health and Development Studies; CLUE=Give Us a Clue to Cancer and Heart Disease; EHNBPCCG=Endogenous Hormones, Nutritional Biomarkers and Prostate Cancer Collaborative Group; EPIC=European Prospective Investigation into Cancer and Nutrition; FMC= Finnish Mobile Clinic Health Examination Survey; HHS= Helsinki Heart Study; HIMS=Health In Men Study; HPFS= Health Professionals Follow-up Study; JACC= Japan Collaborative Cohort Study; JPHC= Japan Public Health Center-based Prospective Study; JHCS= Japan-Hawaii Cancer Study; MCCS=Melbourne Collaborative Cohort Study; MEC=Multiethnic Cohort Study of Diet and Cancer; MMAS=Massachusetts Male Aging Study; NBSBWG=Nordic Biological Specimen Biobank Working Group; NSHDC=Northern Sweden Health and Disease Cohort; PCPT= Prostate Cancer Prevention Trial; PHS=Physicians' Health Study; PLCO= Prostate, Lung, Colorectal and Ovarian Cancer Screening Trial; PSA=prostate-specific antigen; RBS=Rancho Bernardo Study.

**Supplementary Table 5: Partial correlation coefficients of circulating biomarkers in prostate cancer controls\***

|                    | IGF-I              | IGF-II             | IGFBP-1            | IGFBP-2            | IGFBP-3            | Total testosterone | SHBG               | Free testosterone | PSA |
|--------------------|--------------------|--------------------|--------------------|--------------------|--------------------|--------------------|--------------------|-------------------|-----|
| IGF-I              | 1                  |                    |                    |                    |                    |                    |                    |                   |     |
| IGF-II             | 0.42 <sup>b</sup>  | 1                  |                    |                    |                    |                    |                    |                   |     |
| IGFBP-1            | 0.14 <sup>b</sup>  | 0.43 <sup>b</sup>  | 1                  |                    |                    |                    |                    |                   |     |
| IGFBP-2            | 0.24 <sup>b</sup>  | 0.54 <sup>b</sup>  | 0.71 <sup>b</sup>  | 1                  |                    |                    |                    |                   |     |
| IGFBP-3            | 0.50 <sup>b</sup>  | 0.45 <sup>b</sup>  | -0.13 <sup>b</sup> | -0.16 <sup>b</sup> | 1                  |                    |                    |                   |     |
| Total testosterone | 0.02 <sup>a</sup>  | -0.21 <sup>b</sup> | 0.20 <sup>b</sup>  | 0.05 <sup>a</sup>  | -0.09 <sup>b</sup> | 1                  |                    |                   |     |
| SHBG               | -0.20 <sup>b</sup> | -0.27 <sup>b</sup> | 0.03               | 0.03               | -0.21 <sup>b</sup> | 0.49 <sup>b</sup>  | 1                  |                   |     |
| Free testosterone  | 0.17 <sup>b</sup>  | -0.04              | 0.21 <sup>b</sup>  | 0.03               | 0.07 <sup>b</sup>  | 0.77 <sup>b</sup>  | -0.17 <sup>b</sup> | 1                 |     |
| PSA                | -0.03 <sup>a</sup> | -0.004             | 0.04 <sup>a</sup>  | 0.06 <sup>b</sup>  | 0.01               | 0.08 <sup>b</sup>  | -0.04 <sup>b</sup> | 0.11 <sup>b</sup> | 1   |

\* Biomarkers were log-transformed and adjusted for age (5-year groups) and BMI (<25, 25-27.4, 27.5-29.9, 30+ kg/m<sup>2</sup>, unknown)

<sup>a</sup> P <0.05

<sup>b</sup> P <0.001

Abbreviations: IGF=insulin-like growth factor; IGFBP=insulin-like growth factor binding protein; PSA=prostate-specific antigen; SHBG=sex hormone binding globulin

**Supplementary Table 6: Risks of overall, aggressive and early-onset prostate cancer per 80% tile increment in biomarker concentrations in the EHNBPCCG studies**

|                    | Overall prostate cancer |                                    |                    | Aggressive prostate cancer* |                                    |                    | Early-onset prostate cancer† |                                    |                    |
|--------------------|-------------------------|------------------------------------|--------------------|-----------------------------|------------------------------------|--------------------|------------------------------|------------------------------------|--------------------|
|                    | Cases/Controls          | OR per 80% tile increment (95% CI) | P <sub>trend</sub> | Cases/Controls              | OR per 80% tile increment (95% CI) | P <sub>trend</sub> | Cases/Controls               | OR per 80% tile increment (95% CI) | P <sub>trend</sub> |
| Free testosterone  | 14112/34347             | 1.09 (1.02, 1.16)                  | 0.01               | 1756/3327                   | 0.88 (0.73, 1.07)                  | 0.22               | 588/1579                     | 1.41 (1.02, 1.95)                  | 0.04               |
| Total testosterone | 14944/36752             | 0.91 (0.86, 0.97)                  | 0.003              | 1870/3527                   | 0.87 (0.73, 1.04)                  | 0.12               | 611/1665                     | 0.94 (0.70, 1.26)                  | 0.68               |
| SHBG               | 14474/35038             | 0.80 (0.76, 0.86)                  | <0.0001            | 1835/3419                   | 0.91 (0.76, 1.11)                  | 0.36               | 605/1611                     | 0.64 (0.46, 0.90)                  | 0.01               |

Estimates are from logistic regression conditioned on the matching variables and adjusted for age, BMI, height, alcohol intake, smoking status, marital status, education status, racial/ethnic group, and diabetes status. The categorical variables representing the study-specific fifths of the biomarker concentrations was replaced with a continuous variable that was scored as 0, 0.25, 0.5, 0.75, and 1; because the mid-points of the lowest and highest fifths are the 10<sup>th</sup> and 90<sup>th</sup> percentiles of the study-specific biomarker concentrations, a unit increase in this variable can be taken to represent an 80 percentile increase in the biomarker study-specific concentration.

\*Aggressive cancer defined as Gleason grade 8+, or prostate cancer death, or metastases or PSA>100 ng/mL.

†Early-onset defined as diagnosed ≤ 55 years.

Abbreviations: BMI=body mass index; CI=confidence interval; EHNBPCCG=Endogenous Hormones, Nutritional Biomarkers and Prostate Cancer Collaborative Group; OR=odds ratio; PSA=prostate-specific antigen; SHBG=sex hormone-binding globulin.

**Supplementary Table 7: Risks of overall, aggressive and early-onset prostate cancer per study-specific 1 SD increment in biomarker concentrations with mutual adjustment, among cases and their matched controls in EHNBPCCG studies**

|                                 | Overall prostate cancer |                          |                    | Aggressive prostate cancer* |                          |                    | Early-onset prostate cancer† |                          |                    |
|---------------------------------|-------------------------|--------------------------|--------------------|-----------------------------|--------------------------|--------------------|------------------------------|--------------------------|--------------------|
|                                 | Cases/<br>Controls      | OR (95% CI)              | P <sub>trend</sub> | Cases/<br>Controls          | OR (95% CI)              | P <sub>trend</sub> | Cases/<br>Controls           | OR (95% CI)              | P <sub>trend</sub> |
| <b>Free testosterone alone</b>  | <b>14112/34347</b>      | <b>1.03 (1.01, 1.05)</b> | <b>0.01</b>        | <b>1756/3327</b>            | <b>0.96 (0.90, 1.03)</b> | <b>0.29</b>        | <b>588/1579</b>              | <b>1.08 (0.98, 1.19)</b> | <b>0.13</b>        |
| Adjusted for IGF-I              | 11885/29261             | 1.03 (1.00, 1.05)        | 0.03               | 1349/2607                   | 0.95 (0.87, 1.03)        | 0.20               | 453/1228                     | 1.10 (0.99, 1.23)        | 0.08               |
| Adjusted for IGF-II             | 3645/4027               | 1.06 (1.01, 1.12)        | 0.02               | 524/546                     | 1.00 (0.86, 1.16)        | 0.97               | 98/102                       | 1.16 (0.81, 1.67)        | 0.42               |
| Adjusted for IGFBP-1            | 2986/4274               | 1.06 (1.00, 1.11)        | 0.05               | 531/626                     | 1.05 (0.91, 1.22)        | 0.51               | 100/104                      | 1.14 (0.80, 1.63)        | 0.46               |
| Adjusted for IGFBP-2            | 3133/3130               | 1.08 (1.02, 1.15)        | 0.01               | 442/442                     | 1.09 (0.93, 1.27)        | 0.29               | 85/85                        | 1.23 (0.83, 1.82)        | 0.31               |
| Adjusted for IGFBP-3            | 6505/8472               | 1.06 (1.02, 1.10)        | 0.003              | 1035/1444                   | 1.02 (0.92, 1.13)        | 0.67               | 201/272                      | 1.38 (1.10, 1.73)        | 0.01               |
| <b>Total testosterone alone</b> | <b>14944/36752</b>      | <b>0.96 (0.94, 0.99)</b> | <b>0.0009</b>      | <b>1870/3527</b>            | <b>0.95 (0.89, 1.01)</b> | <b>0.09</b>        | <b>611/1665</b>              | <b>0.96 (0.87, 1.07)</b> | <b>0.48</b>        |
| Adjusted for IGF-I              | 12344/31008             | 0.97 (0.95, 0.99)        | 0.009              | 1384/2712                   | 0.93 (0.87, 1.01)        | 0.07               | 473/1307                     | 1.00 (0.89, 1.12)        | 0.98               |
| Adjusted for IGF-II             | 3649/4032               | 0.99 (0.94, 1.04)        | 0.62               | 525/548                     | 0.99 (0.86, 1.14)        | 0.90               | 99/103                       | 1.19 (0.80, 1.76)        | 0.39               |
| Adjusted for IGFBP-1            | 2990/4280               | 0.97 (0.92, 1.02)        | 0.26               | 532/628                     | 1.04 (0.91, 1.19)        | 0.55               | 101/105                      | 1.13 (0.78, 1.65)        | 0.51               |
| Adjusted for IGFBP-2            | 3137/3134               | 0.99 (0.94, 1.05)        | 0.80               | 443/443                     | 1.08 (0.93, 1.26)        | 0.32               | 86/86                        | 1.29 (0.83, 2.01)        | 0.26               |
| Adjusted for IGFBP-3            | 6553/8521               | 1.00 (0.97, 1.04)        | 0.91               | 1048/1458                   | 1.00 (0.91, 1.09)        | 0.98               | 202/273                      | 1.39 (1.10, 1.76)        | 0.01               |
| <b>SHBG alone</b>               | <b>14474/35038</b>      | <b>0.91 (0.89, 0.93)</b> | <b>&lt;0.0001</b>  | <b>1835/3419</b>            | <b>0.97 (0.91, 1.04)</b> | <b>0.40</b>        | <b>605/1611</b>              | <b>0.83 (0.74, 0.95)</b> | <b>0.005</b>       |
| Adjusted for IGF-I              | 12077/29665             | 0.91 (0.89, 0.94)        | <0.0001            | 1388/2658                   | 0.98 (0.91, 1.06)        | 0.58               | 468/1254                     | 0.83 (0.72, 0.96)        | 0.01               |
| Adjusted for IGF-II             | 3711/4094               | 0.92 (0.87, 0.97)        | 0.0012             | 541/563                     | 0.99 (0.87, 1.13)        | 0.89               | 104/108                      | 1.20 (0.76, 1.88)        | 0.44               |
| Adjusted for IGFBP-1            | 3053/4347               | 0.90 (0.85, 0.95)        | 0.0001             | 548/645                     | 1.02 (0.89, 1.16)        | 0.79               | 106/110                      | 1.12 (0.71, 1.76)        | 0.63               |
| Adjusted for IGFBP-2            | 3198/3195               | 0.90 (0.85, 0.96)        | 0.0008             | 459/459                     | 0.99 (0.84, 1.15)        | 0.86               | 91/91                        | 1.31 (0.74, 2.33)        | 0.36               |
| Adjusted for IGFBP-3            | 6662/8649               | 0.93 (0.90, 0.97)        | 0.0006             | 1075/1489                   | 1.00 (0.91, 1.10)        | 0.98               | 214/285                      | 1.03 (0.79, 1.36)        | 0.81               |
| Adjusted for total testosterone | 14159/34689             | 0.90 (0.87, 0.92)        | <0.0001            | 1756/3327                   | 1.01 (0.93, 1.10)        | 0.73               | 591/1599                     | 0.77 (0.66, 0.90)        | 0.001              |

Estimates are from logistic regression conditioned on the matching variables and adjusted for age, BMI, height, alcohol intake, smoking status, marital status, education status, racial/ethnic group, and diabetes status. Estimates were mutually adjusted for biomarkers per study-specific 1 SD entered as a continuous variable.

Abbreviations: BMI=body mass index; CI=confidence interval; EHNBPCCG=Endogenous Hormones, Nutritional Biomarkers and Prostate Cancer Collaborative Group; IGF=insulin-like growth factor; IGFBP=insulin-like growth factor binding protein; OR=odds ratio; SD=standard deviation.

**Supplementary Table 8: Risks of overall prostate cancer in relation to biomarkers, stratified by other study-specific median biomarker concentrations in EHNBPCCG studies**

|                    |          | Free testosterone  |                   |                  | Total testosterone |              |                  | SHBG               |              |                  |
|--------------------|----------|--------------------|-------------------|------------------|--------------------|--------------|------------------|--------------------|--------------|------------------|
|                    |          | Cases/<br>controls | OR (95 % CI)      | P <sub>het</sub> | Cases/<br>controls | OR (95 % CI) | P <sub>het</sub> | Cases/<br>controls | OR (95 % CI) | P <sub>het</sub> |
| Free testosterone  | < Median |                    |                   |                  |                    |              |                  |                    |              |                  |
|                    | Median + |                    |                   |                  |                    |              |                  |                    |              |                  |
| Total testosterone | < Median |                    |                   |                  |                    |              | 7172/17152       | 0.92 (0.88, 0.96)  |              |                  |
|                    | Median + |                    |                   |                  |                    |              | 6940/17195       | 0.90 (0.87, 0.92)  | 0.24         |                  |
| SHBG               | < Median |                    |                   | 7379/17169       | 1.03 (0.99, 1.07)  |              |                  |                    |              |                  |
|                    | Median + |                    |                   | 6733/17178       | 0.97 (0.94, 1.00)  | 0.01         |                  |                    |              |                  |
| IGF-I              | < Median | 5467/14419         | 1.05 (1.02, 1.09) | 5677/15316       | 0.96 (0.93, 0.99)  |              | 5559/14602       | 0.90 (0.87, 0.93)  |              |                  |
|                    | Median + | 6384/14682         | 1.01 (0.98, 1.05) | 6632/15528       | 0.97 (0.94, 1.00)  | 0.76         | 6479/14902       | 0.92 (0.89, 0.95)  | 0.42         |                  |
| IGF-II             | < Median | 1660/1972          | 1.08 (1.00, 1.16) | 1662/1974        | 0.96 (0.90, 1.03)  |              | 1689/2004        | 0.89 (0.83, 0.95)  |              |                  |
|                    | Median + | 1976/2045          | 1.05 (0.98, 1.12) | 1978/2048        | 1.02 (0.95, 1.09)  | 0.23         | 2013/2080        | 0.97 (0.90, 1.04)  | 0.08         |                  |
| IGFBP-1            | < Median | 1276/1899          | 1.04 (0.96, 1.13) | 1277/1902        | 1.00 (0.92, 1.09)  |              | 1304/1923        | 0.96 (0.88, 1.05)  |              |                  |
|                    | Median + | 1703/2328          | 1.07 (1.00, 1.14) | 1706/2331        | 0.95 (0.89, 1.01)  | 0.31         | 1742/2377        | 0.86 (0.81, 0.92)  | 0.04         |                  |
| IGFBP-2            | < Median | 1508/1616          | 1.08 (1.00, 1.17) | 1508/1620        | 1.00 (0.92, 1.08)  |              | 1544/1644        | 0.90 (0.82, 0.98)  |              |                  |
|                    | Median + | 1619/1511          | 1.07 (0.99, 1.16) | 1623/1511        | 0.97 (0.90, 1.04)  | 0.61         | 1648/1548        | 0.90 (0.84, 0.96)  | 0.97         |                  |
| IGFBP-3            | < Median | 3136/4218          | 1.08 (1.02, 1.14) | 3163/4248        | 0.98 (0.93, 1.03)  |              | 3214/4309        | 0.91 (0.87, 0.95)  |              |                  |
|                    | Median + | 3332/4193          | 1.05 (1.00, 1.10) | 3352/4212        | 1.01 (0.96, 1.07)  | 0.32         | 3407/4278        | 0.96 (0.90, 1.01)  | 0.17         |                  |

Estimates are from logistic regression conditioned on the matching variables and adjusted for age, BMI, height, alcohol intake, smoking status, marital status, education status, racial/ethnic group, and diabetes status.

Abbreviations: BMI=body mass index; CI=confidence interval; EHNBPCCG=Endogenous Hormones, Nutritional Biomarkers and Prostate Cancer Collaborative Group; IGF=insulin-like growth factor; IGFBP=insulin-like growth factor binding protein; OR=odds ratio; SD=standard deviation; SHBG=sex hormone binding globulin.



**Supplementary Table 9: Risks of aggressive prostate cancer in relation to biomarkers, stratified by other study-specific median biomarker concentrations in EHNBPCCG studies**

|                    |          | Free testosterone  |                   |                  | Total testosterone |              |                  | SHBG               |              |                  |
|--------------------|----------|--------------------|-------------------|------------------|--------------------|--------------|------------------|--------------------|--------------|------------------|
|                    |          | Cases/<br>controls | OR (95 % CI)      | P <sub>het</sub> | Cases/<br>controls | OR (95 % CI) | P <sub>het</sub> | Cases/<br>controls | OR (95 % CI) | P <sub>het</sub> |
| Free testosterone  | < Median |                    |                   |                  |                    |              |                  |                    |              |                  |
|                    | Median + |                    |                   |                  |                    |              |                  |                    |              |                  |
| Total testosterone | < Median |                    |                   |                  |                    |              | 943/1704         | 1.05 (0.93, 1.18)  |              |                  |
|                    | Median + |                    |                   |                  |                    |              | 813/1623         | 0.96 (0.87, 1.05)  | 0.08         |                  |
| SHBG               | < Median |                    |                   | 890/1657         | 1.07 (0.94, 1.21)  |              |                  |                    |              |                  |
|                    | Median + |                    |                   | 866/1670         | 0.87 (0.79, 0.95)  | 0.01         |                  |                    |              |                  |
| IGF-I              | < Median | 658/1322           | 0.95 (0.85, 1.07) | 676/1383         | 0.91 (0.82, 1.01)  |              | 678/1345         | 0.93 (0.84, 1.02)  |              |                  |
|                    | Median + | 691/1285           | 0.95 (0.86, 1.05) | 708/1329         | 0.96 (0.86, 1.07)  | 0.41         | 710/1313         | 1.04 (0.92, 1.16)  | 0.33         |                  |
| IGF-II             | < Median | 261/261            | 1.09 (0.88, 1.36) | 262/262          | 1.02 (0.84, 1.24)  |              | 268/266          | 0.99 (0.84, 1.17)  |              |                  |
|                    | Median + | 263/285            | 0.94 (0.78, 1.14) | 263/286          | 0.97 (0.80, 1.18)  | 1            | 273/297          | 1.01 (0.82, 1.24)  | 0.73         |                  |
| IGFBP-1            | < Median | 217/280            | 1.08 (0.84, 1.38) | 217/281          | 1.22 (0.97, 1.54)  |              | 227/285          | 1.23 (1.00, 1.51)  |              |                  |
|                    | Median + | 314/346            | 1.03 (0.87, 1.22) | 315/347          | 0.93 (0.79, 1.10)  | 0.06         | 321/360          | 0.85 (0.71, 1.02)  | 0.01         |                  |
| IGFBP-2            | < Median | 214/221            | 1.14 (0.93, 1.40) | 214/222          | 1.09 (0.87, 1.36)  |              | 227/227          | 0.93 (0.70, 1.24)  |              |                  |
|                    | Median + | 228/221            | 1.01 (0.81, 1.26) | 229/221          | 1.00 (0.82, 1.21)  | 0.3          | 232/232          | 0.94 (0.78, 1.14)  | 0.83         |                  |
| IGFBP-3            | < Median | 548/770            | 1.01 (0.87, 1.16) | 556/778          | 0.99 (0.88, 1.11)  |              | 567/792          | 0.99 (0.89, 1.11)  |              |                  |
|                    | Median + | 487/674            | 1.04 (0.90, 1.19) | 492/680          | 1.01 (0.88, 1.16)  | 0.33         | 508/697          | 1.00 (0.86, 1.17)  | 0.44         |                  |

Estimates are from logistic regression conditioned on the matching variables and adjusted for age, BMI, height, alcohol intake, smoking status, marital status, education status, racial/ethnic group, and diabetes status.

Abbreviations: BMI=body mass index; CI=confidence interval; IGF=insulin-like growth factor; EHNBPCCG=Endogenous Hormones, Nutritional Biomarkers and Prostate Cancer Collaborative Group; IGFBP=insulin-like growth factor binding protein; OR=odds ratio; SD=standard deviation; SHBG=sex hormone-binding globulin.

**Supplementary Table 10: Trait associations with the SHBG *cis*-SNP\***

| SNP              | Positive association                                                |
|------------------|---------------------------------------------------------------------|
| SHBG (rs1799941) | Testosterone                                                        |
|                  | Impedance of arm left                                               |
|                  | Impedance of arm right                                              |
|                  | Vascular or heart problems diagnosed by doctor: high blood pressure |
|                  | Impedance of whole body                                             |
|                  | Self-reported hypertension                                          |

\*Using PhenoScanner resource (P threshold= $5 \times 10^{-8}$ )<sup>1,2</sup>. Associations are orientated such that the effect allele is positively associated with protein expression.

Abbreviations: SHBG=sex hormone-binding globulin.

**Supplementary Table 11: Association of free testosterone SNPs used in 2-sample Mendelian randomization analyses with prostate cancer**

| SNP        | Chr | Position  | Consequence | Nearest gene  | Effect allele | Other allele | Association parameters with free testosterone |       |           | Association parameters with overall prostate cancer |        |          | Association parameters with aggressive prostate cancer |        |           | Association parameters with early-onset prostate cancer |        |          |
|------------|-----|-----------|-------------|---------------|---------------|--------------|-----------------------------------------------|-------|-----------|-----------------------------------------------------|--------|----------|--------------------------------------------------------|--------|-----------|---------------------------------------------------------|--------|----------|
|            |     |           |             |               |               |              | Beta                                          | SE    | P-value   | Beta                                                | SE     | P-value  | Beta                                                   | SE     | P-value   | Beta                                                    | SE     | P-value  |
| rs72664935 | 1   | 32274901  | intron      | SPOCD1        | C             | T            | 0.019                                         | 0.003 | 1.70E-09  | 0.0154                                              | 0.0086 | 0.07481  | 0.0046                                                 | 0.0148 | 0.7543    | 0.0039                                                  | 0.0216 | 0.8554   |
| rs71519251 | 1   | 163251833 | intron      | NUF2          | A             | G            | 0.024                                         | 0.004 | 1.50E-09  | -0.0203                                             | 0.0105 | 0.05285  | -0.0109                                                | 0.018  | 0.5456    | -0.0245                                                 | 0.0264 | 0.3545   |
| rs35737316 | 1   | 204161534 | -           | -             | T             | C            | 0.04                                          | 0.004 | 4.70E-32  | 0.0017                                              | 0.0093 | 0.8552   | -0.0075                                                | 0.0161 | 0.6427    | -3.00E-04                                               | 0.0231 | 0.9886   |
| rs13028479 | 2   | 11712075  | intron      | GREB1         | G             | T            | 0.031                                         | 0.003 | 2.70E-24  | 0.0143                                              | 0.0087 | 0.1017   | 0.0079                                                 | 0.0151 | 0.5989    | 0.0089                                                  | 0.0218 | 0.6823   |
| rs829593   | 2   | 30641234  | intergenic  | RP11-182E7.1  | G             | A            | 0.018                                         | 0.003 | 1.50E-08  | -0.0014                                             | 0.009  | 0.876    | -0.0072                                                | 0.0155 | 0.6439    | -0.0148                                                 | 0.0224 | 0.5082   |
| rs2438086  | 2   | 105871129 | downstream  | AC012360.1    | G             | A            | 0.022                                         | 0.003 | 6.90E-13  | 0.0202                                              | 0.0091 | 0.02634  | 0.0196                                                 | 0.0155 | 0.2071    | 0.0229                                                  | 0.023  | 0.32     |
| rs6718154  | 2   | 180497923 | intron      | ZNF385B       | T             | C            | 0.032                                         | 0.003 | 1.20E-22  | 0.0011                                              | 0.0088 | 0.8978   | -0.0077                                                | 0.0152 | 0.6111    | 0.0153                                                  | 0.0219 | 0.4834   |
| rs2011425  | 2   | 234627608 | missense    | UGT1A4        | T             | G            | 0.05                                          | 0.006 | 6.40E-20  | 0.0117                                              | 0.0147 | 0.4278   | 0.0054                                                 | 0.0254 | 0.8299    | 0.0047                                                  | 0.0365 | 0.8976   |
| rs1112195  | 3   | 24085166  | intergenic  | CRIP1P2       | G             | A            | 0.018                                         | 0.003 | 4.70E-10  | -0.003                                              | 0.0082 | 0.7172   | 0.009                                                  | 0.014  | 0.523     | -0.0183                                                 | 0.0204 | 0.37     |
| rs9824196  | 3   | 28807441  | intron      | RBMS3         | T             | G            | 0.026                                         | 0.003 | 4.10E-16  | 0.0096                                              | 0.009  | 0.2893   | 0.0075                                                 | 0.0155 | 0.6296    | 0.0202                                                  | 0.0226 | 0.3711   |
| rs3821866  | 3   | 53805577  | intron      | CACNA1D       | G             | C            | 0.022                                         | 0.003 | 4.10E-14  | -0.0052                                             | 0.0084 | 0.5324   | 0.0131                                                 | 0.0145 | 0.3646    | 0.0211                                                  | 0.0211 | 0.3172   |
| rs10510939 | 3   | 65507808  | intron      | MAG1          | C             | T            | 0.017                                         | 0.003 | 1.60E-08  | 0.0066                                              | 0.0083 | 0.4294   | -0.0101                                                | 0.0143 | 0.4791    | 0.0135                                                  | 0.0207 | 0.5155   |
| rs34040779 | 3   | 107235109 | intergenic  | CD200R1L      | T             | C            | 0.035                                         | 0.006 | 2.20E-09  | 0.0794                                              | 0.0158 | 4.58E-07 | 0.0587                                                 | 0.0271 | 0.03022   | 0.1415                                                  | 0.0413 | 0.000613 |
| rs4678408  | 3   | 138053187 | upstream    | NME9          | G             | A            | 0.026                                         | 0.003 | 7.60E-17  | -0.0082                                             | 0.0088 | 0.3522   | -0.0184                                                | 0.0151 | 0.2232    | 0.0059                                                  | 0.0221 | 0.791    |
| rs61762319 | 3   | 154801978 | missense    | MME           | G             | A            | 0.05                                          | 0.009 | 2.70E-08  | 0.0219                                              | 0.0355 | 0.5377   | -0.0224                                                | 0.0612 | 0.7146    | -0.0134                                                 | 0.089  | 0.8807   |
| rs7679843  | 4   | 22028079  | intron      | RP11-17E2.2   | G             | C            | 0.05                                          | 0.005 | 3.80E-22  | 0.0095                                              | 0.0143 | 0.5054   | -0.0025                                                | 0.0248 | 0.9207    | 0.0182                                                  | 0.0353 | 0.6055   |
| rs4274916  | 4   | 69988378  | upstream    | 644M16.1      | C             | T            | 0.017                                         | 0.003 | 3.20E-09  | -0.0055                                             | 0.0081 | 0.4964   | -0.0122                                                | 0.014  | 0.3851    | 0.0031                                                  | 0.0202 | 0.8798   |
| rs17254118 | 4   | 103651441 | intron      | MANBA         | C             | T            | 0.109                                         | 0.011 | 5.10E-24  | 0.0206                                              | 0.0371 | 0.5788   | 0.0323                                                 | 0.0641 | 0.6149    | 0.1764                                                  | 0.0894 | 0.04832  |
| rs72774885 | 5   | 95840231  | intron      | CTD-2337A12.1 | C             | T            | 0.027                                         | 0.004 | 3.50E-10  | -0.0202                                             | 0.013  | 0.1186   | -0.0231                                                | 0.0224 | 0.302     | -0.0412                                                 | 0.0325 | 0.2054   |
| rs950716   | 5   | 135680540 | intron      | TRPC7         | A             | G            | 0.034                                         | 0.004 | 3.10E-14  | 0.0122                                              | 0.012  | 0.3126   | -0.002                                                 | 0.0207 | 0.921     | 0.0181                                                  | 0.0295 | 0.5385   |
| rs2961853  | 5   | 165932048 | intergenic  | HMP19         | C             | T            | 0.019                                         | 0.003 | 3.20E-10  | 0.01                                                | 0.0087 | 0.2517   | 0.0253                                                 | 0.0149 | 0.08851   | 0.0156                                                  | 0.0218 | 0.4751   |
| rs34192788 | 6   | 17416258  | intron      | CAP2          | T             | A            | 0.02                                          | 0.003 | 4.20E-09  | 0.0175                                              | 0.0095 | 0.06431  | 0.0285                                                 | 0.0161 | 0.07553   | 0.0172                                                  | 0.0238 | 0.4711   |
| rs204995   | 6   | 32154285  | intron      | PBX2          | A             | G            | 0.027                                         | 0.003 | 3.20E-13  | 0.0502                                              | 0.0096 | 1.76E-07 | 0.0622                                                 | 0.0166 | 0.0001741 | 0.0557                                                  | 0.0232 | 0.01645  |
| rs11751920 | 6   | 34655818  | intron      | C6orf106      | G             | C            | 0.061                                         | 0.01  | 4.60E-09  | -0.0516                                             | 0.0301 | 0.08581  | -0.075                                                 | 0.0508 | 0.14      | -0.0742                                                 | 0.0754 | 0.3256   |
| rs7454964  | 6   | 52728059  | intron      | GSTA11P       | T             | C            | 0.017                                         | 0.003 | 1.80E-08  | -0.001                                              | 0.0081 | 0.8981   | 0.0199                                                 | 0.014  | 0.1552    | -0.0043                                                 | 0.0202 | 0.8332   |
| rs9322822  | 6   | 105369598 | intron      | LIN28B-AS1    | C             | T            | 0.049                                         | 0.003 | 2.10E-52  | 0.0078                                              | 0.0085 | 0.3532   | -0.0211                                                | 0.0145 | 0.1458    | 0.0208                                                  | 0.0209 | 0.3216   |
| rs2184968  | 6   | 126760994 | intergenic  | RP11-394G3.2  | C             | T            | 0.02                                          | 0.003 | 9.10E-11  | 0.0094                                              | 0.008  | 0.2435   | 0.0028                                                 | 0.0138 | 0.839     | -0.041                                                  | 0.02   | 0.04085  |
| rs9986829  | 7   | 15019259  | upstream    | DGKB          | A             | G            | 0.056                                         | 0.003 | 2.80E-76  | 0.0011                                              | 0.0085 | 0.8949   | 0.0172                                                 | 0.0145 | 0.2365    | 0.007                                                   | 0.0211 | 0.7408   |
| rs10279715 | 7   | 40870935  | intron      | SUGCT         | A             | G            | 0.022                                         | 0.003 | 3.10E-13  | 0.0412                                              | 0.0082 | 4.87E-07 | 0.0459                                                 | 0.014  | 0.001002  | 0.0431                                                  | 0.0204 | 0.03434  |
| rs55795858 | 7   | 146123500 | intron      | CNTNAP2       | C             | T            | 0.018                                         | 0.003 | 1.50E-08  | -0.0039                                             | 0.0094 | 0.6779   | -0.0031                                                | 0.016  | 0.8443    | -1.00E-04                                               | 0.0234 | 0.9972   |
| rs2631864  | 8   | 21112084  | intergenic  | RP11-24P4.1   | G             | A            | 0.033                                         | 0.005 | 8.30E-12  | 0.0236                                              | 0.0131 | 0.07202  | 0.0378                                                 | 0.0224 | 0.09162   | 0.0518                                                  | 0.0322 | 0.1076   |
| rs4872310  | 8   | 25247181  | intron      | DOCK5         | G             | A            | 0.023                                         | 0.004 | 3.70E-12  | 0.0036                                              | 0.0094 | 0.7018   | -0.0111                                                | 0.0162 | 0.4931    | 0.0223                                                  | 0.0237 | 0.3454   |
| rs4562360  | 8   | 61704817  | intron      | CHD7          | G             | A            | 0.032                                         | 0.004 | 3.60E-20  | 0.0269                                              | 0.0095 | 0.004597 | 0.0372                                                 | 0.0163 | 0.02256   | 0.0443                                                  | 0.0233 | 0.05703  |
| rs71529289 | 8   | 77879487  | upstream    | hsa-mir-3149  | C             | T            | 0.036                                         | 0.003 | 2.00E-25  | 8.00E-04                                            | 0.0097 | 0.9329   | -0.0077                                                | 0.0166 | 0.642     | 0.0386                                                  | 0.0247 | 0.1185   |
| rs745486   | 9   | 11242155  | intergenic  | RP11-23D5.1   | C             | T            | 0.021                                         | 0.003 | 1.20E-10  | -0.0029                                             | 0.0092 | 0.7516   | 0.0017                                                 | 0.0158 | 0.9132    | 0.0349                                                  | 0.0231 | 0.131    |
| rs10738700 | 9   | 24973797  | intergenic  | RMRPP5        | A             | G            | 0.02                                          | 0.003 | 5.60E-11  | 0.0074                                              | 0.0085 | 0.3821   | 0.0239                                                 | 0.0145 | 0.09955   | -0.0069                                                 | 0.0211 | 0.744    |
| rs912202   | 9   | 77225603  | intron      | RORB          | C             | G            | 0.04                                          | 0.003 | 2.50E-38  | 0.0103                                              | 0.0087 | 0.2357   | -0.0058                                                | 0.0149 | 0.698     | 0.0258                                                  | 0.0217 | 0.2357   |
| rs2090409  | 9   | 108967088 | intron      | LINC01505     | C             | A            | 0.031                                         | 0.003 | 1.70E-21  | 0.0015                                              | 0.0084 | 0.8582   | 0.0051                                                 | 0.0144 | 0.7206    | -0.0264                                                 | 0.0208 | 0.2053   |
| rs10982156 | 9   | 117088064 | intron      | ORM1          | A             | T            | 0.048                                         | 0.006 | 4.50E-14  | -0.0259                                             | 0.0201 | 0.1992   | -0.0418                                                | 0.0341 | 0.2209    | 0.0079                                                  | 0.05   | 0.8742   |
| rs7872329  | 9   | 131956152 | intron      | RP11-247A12.2 | A             | T            | 0.017                                         | 0.003 | 3.80E-08  | 0.0173                                              | 0.0093 | 0.06466  | 0.008                                                  | 0.016  | 0.616     | 0.0585                                                  | 0.0236 | 0.01327  |
| rs7912521  | 10  | 67262089  | intergenic  | LINC01515     | C             | T            | 0.061                                         | 0.003 | 6.20E-94  | -0.001                                              | 0.0082 | 0.9003   | 0.0053                                                 | 0.0141 | 0.7085    | -0.0136                                                 | 0.0203 | 0.5039   |
| rs4919686  | 10  | 104592249 | intron      | CYP17A1       | A             | C            | 0.023                                         | 0.003 | 3.90E-13  | 0.04                                                | 0.0088 | 5.45E-06 | 0.0413                                                 | 0.0151 | 0.006366  | 0.0923                                                  | 0.022  | 2.72E-05 |
| rs7915430  | 10  | 121660465 | intron      | SEC23IP       | T             | G            | 0.021                                         | 0.004 | 9.70E-09  | 0.0026                                              | 0.0098 | 0.7913   | -0.0024                                                | 0.0169 | 0.8853    | -0.0176                                                 | 0.0245 | 0.474    |
| rs2035837  | 11  | 29200527  | intron      | RP11-466H1.1  | T             | C            | 0.073                                         | 0.004 | 6.70E-67  | 0.0149                                              | 0.0112 | 0.1819   | 0.0117                                                 | 0.0193 | 0.546     | 0.0444                                                  | 0.0281 | 0.1143   |
| rs55765314 | 11  | 72360935  | intron      | PDE2A         | C             | A            | 0.025                                         | 0.004 | 4.60E-10  | -0.0054                                             | 0.0112 | 0.6312   | -0.0177                                                | 0.019  | 0.3521    | 0.0078                                                  | 0.0285 | 0.7831   |
| rs12796488 | 11  | 94131557  | intron      | GPR83         | C             | A            | 0.056                                         | 0.004 | 6.90E-46  | 0.0155                                              | 0.0112 | 0.1669   | 0.0115                                                 | 0.0192 | 0.5485    | 0.0231                                                  | 0.0278 | 0.4063   |
| rs503542   | 11  | 118590743 | intron      | AP002954.4    | G             | A            | 0.018                                         | 0.003 | 5.80E-10  | -0.0066                                             | 0.0083 | 0.4305   | -0.0034                                                | 0.0143 | 0.8142    | -0.0088                                                 | 0.0207 | 0.6698   |
| rs56196860 | 12  | 2908330   | missense    | FKBP4         | A             | C            | 0.321                                         | 0.009 | 1.00E-200 | 0.0353                                              | 0.0287 | 0.2199   | 0.0583                                                 | 0.0489 | 0.2329    | -0.0455                                                 | 0.0721 | 0.5275   |
| rs12810788 | 12  | 116196322 | -           | RP11-110L15.1 | G             | A            | 0.027                                         | 0.004 | 1.10E-11  | 0.0222                                              | 0.0108 | 0.03952  | 0.0176                                                 | 0.0187 | 0.3462    | 0.0531                                                  | 0.0262 | 0.04299  |
| rs6486542  | 12  | 130952209 | intron      | RIMBP2        | C             | T            | 0.026                                         | 0.003 | 2.90E-18  | 0.0018                                              | 0.0091 | 0.8445   | 0.0167                                                 | 0.0155 | 0.2814    | 0.0368                                                  | 0.0229 | 0.1087   |
| rs2038695  | 13  | 100559123 | intergenic  | CLYBL         | C             | A            | 0.023                                         | 0.003 | 2.60E-15  | -0.001                                              | 0.0097 | 0.9185   | 0.0026                                                 | 0.0164 | 0.872     | -0.0121                                                 | 0.0245 | 0.6195   |

|            |    |          |             |              |   |   |       |       |          |         |        |         |          |        |        |         |        |          |
|------------|----|----------|-------------|--------------|---|---|-------|-------|----------|---------|--------|---------|----------|--------|--------|---------|--------|----------|
| rs10137488 | 14 | 35797122 | intergenic  | PSMA6        | C | T | 0.053 | 0.01  | 2.10E-08 | 0.0108  | 0.0241 | 0.6527  | -0.0395  | 0.0413 | 0.3393 | -0.0176 | 0.0611 | 0.773    |
| rs1272131  | 14 | 60886150 | intron      | C14orf39     | C | T | 0.027 | 0.003 | 1.40E-17 | -0.009  | 0.0082 | 0.271   | 0.0213   | 0.0141 | 0.1306 | -0.0539 | 0.0204 | 0.008183 |
| rs1812755  | 14 | 90007637 | intron      | FOXP3        | T | C | 0.034 | 0.004 | 5.10E-19 | -0.0107 | 0.0113 | 0.3472  | 0.0048   | 0.0197 | 0.8069 | -0.0139 | 0.0282 | 0.6209   |
| rs1454836  | 15 | 47551054 | intron      | SEMA6D       | T | A | 0.017 | 0.003 | 3.40E-08 | 0.0183  | 0.0085 | 0.03156 | 0.0041   | 0.0145 | 0.7777 | -0.0177 | 0.0212 | 0.4023   |
| rs17703883 | 15 | 51530097 | intron      | CYP19A1      | C | T | 0.044 | 0.004 | 7.50E-40 | 0.0085  | 0.0093 | 0.3606  | 0.0216   | 0.0159 | 0.1764 | 0.0031  | 0.0229 | 0.8932   |
| rs13835    | 15 | 89056040 | 3_prime_UTR | DET1         | A | C | 0.019 | 0.003 | 4.90E-10 | -0.0034 | 0.0081 | 0.6718  | 0.0155   | 0.0139 | 0.2666 | 0.001   | 0.0201 | 0.9586   |
| rs2764772  | 16 | 20060653 | intron      | GPR139       | A | T | 0.037 | 0.003 | 5.40E-33 | 0.0079  | 0.0089 | 0.3713  | 2.00E-04 | 0.0154 | 0.9883 | 0.0734  | 0.0221 | 0.000906 |
| rs8061590  | 16 | 28895130 | intron      | ATP2A1       | A | G | 0.029 | 0.003 | 3.40E-21 | -0.0022 | 0.0083 | 0.788   | 0.007    | 0.0144 | 0.6246 | 0.0162  | 0.0207 | 0.4335   |
| rs62041532 | 16 | 73922719 | intergenic  | RPSAP56      | G | T | 0.023 | 0.004 | 1.60E-10 | 0.007   | 0.0111 | 0.5255  | 0.0114   | 0.0188 | 0.545  | 0.075   | 0.0275 | 0.006334 |
| rs1799941  | 17 | 7533423  | 5_prime_UTR | SHBG         | G | A | 0.034 | 0.003 | 7.70E-23 | 0.0025  | 0.0092 | 0.7873  | 0.0079   | 0.0159 | 0.6203 | -0.0141 | 0.0228 | 0.5369   |
| rs58879558 | 17 | 44095467 | intron      | MAPT         | C | T | 0.023 | 0.004 | 2.40E-09 | -0.0187 | 0.0097 | 0.05529 | -0.0225  | 0.0168 | 0.1803 | -0.0531 | 0.0237 | 0.02504  |
| rs8076703  | 17 | 75612643 | intergenic  | RP11-13K12.6 | C | T | 0.024 | 0.003 | 1.00E-12 | -0.0045 | 0.0095 | 0.6327  | 0.004    | 0.0161 | 0.8017 | -0.029  | 0.0239 | 0.2238   |
| rs2668776  | 18 | 44750365 | intron      | SKOR2        | C | T | 0.029 | 0.003 | 1.70E-22 | 0.0136  | 0.008  | 0.08917 | 0.0037   | 0.0137 | 0.7861 | 0.0284  | 0.0198 | 0.152    |
| rs2327121  | 20 | 8878250  | intron      | PLCB1        | C | G | 0.018 | 0.003 | 1.30E-08 | 0.0148  | 0.0086 | 0.08369 | 0.0215   | 0.0146 | 0.1418 | 0.0385  | 0.0215 | 0.07379  |
| rs7265992  | 20 | 33525407 | intron      | GSS          | G | A | 0.032 | 0.004 | 4.00E-16 | -0.0083 | 0.011  | 0.4483  | 0.0148   | 0.0189 | 0.435  | 0.0085  | 0.0267 | 0.7498   |
| rs11703376 | 22 | 49678713 | intergenic  | -            | T | C | 0.04  | 0.003 | 5.90E-32 | 0.0163  | 0.0095 | 0.08627 | 0.0148   | 0.0163 | 0.3632 | 0.0381  | 0.0236 | 0.1066   |

\*Aggressive cancer defined as Gleason grade 8+, or prostate cancer death, or metastases or PSA>100 ng/mL. Early-onset defined as diagnosed ≤ 55 years.

Abbreviations: Chr=chromosome; PSA=prostate-specific antigen; SE=standard error; SNP=single nucleotide polymorphism UTR=untranslated region.

**Supplementary Table 12: Association of total testosterone SNPs used in 2-sample Mendelian randomization analyses with prostate cancer**

| SNP         | Chr | Position  | Consequence                                  | Nearest gene      | Effect allele | Other allele | Association parameters with total testosterone |       |          | Association parameters with overall prostate cancer |        |           | Association parameters with aggressive prostate cancer |        |          | Association parameters with early-onset prostate cancer |        |           |
|-------------|-----|-----------|----------------------------------------------|-------------------|---------------|--------------|------------------------------------------------|-------|----------|-----------------------------------------------------|--------|-----------|--------------------------------------------------------|--------|----------|---------------------------------------------------------|--------|-----------|
|             |     |           |                                              |                   |               |              | Beta                                           | SE    | P-value  | Beta                                                | SE     | P-value   | Beta                                                   | SE     | P-value  | Beta                                                    | SE     | P-value   |
| rs36086195  | 1   | 16510894  | intergenic                                   | ARHGEF19-AS1      | T             | C            | 0.019                                          | 0.003 | 1.70E-09 | -0.0071                                             | 0.0082 | 0.3885    | -0.002                                                 | 0.0142 | 0.8862   | 0.0167                                                  | 0.0204 | 0.4143    |
| rs114165349 | 1   | 27021913  | intron                                       | ARID1A            | G             | C            | 0.148                                          | 0.01  | 6.70E-51 | 0.0242                                              | 0.0277 | 0.3823    | 0.0925                                                 | 0.0487 | 0.05735  | -0.0756                                                 | 0.0695 | 0.277     |
| rs3768321   | 1   | 40035928  | intron                                       | PABPC4            | G             | T            | 0.031                                          | 0.004 | 5.40E-15 | -0.0179                                             | 0.0106 | 0.09203   | -0.0025                                                | 0.018  | 0.8903   | -0.0345                                                 | 0.026  | 0.185     |
| rs9970140   | 1   | 61684288  | intron                                       | NFIA              | G             | A            | 0.04                                           | 0.006 | 6.80E-12 | 0.0157                                              | 0.0168 | 0.3495    | -0.0021                                                | 0.0288 | 0.9428   | -0.0299                                                 | 0.0423 | 0.479     |
| rs6676846   | 1   | 92942352  | intron                                       | GFII1             | A             | G            | 0.03                                           | 0.004 | 1.20E-15 | 0.0025                                              | 0.0098 | 0.7961    | 0.0027                                                 | 0.0168 | 0.8708   | -0.0226                                                 | 0.0244 | 0.3556    |
| rs12406721  | 1   | 107563243 | intergenic                                   | PRMT6             | T             | G            | 0.033                                          | 0.003 | 2.30E-28 | 0.0049                                              | 0.0088 | 0.5773    | -1.00E-04                                              | 0.0152 | 0.9969   | 0.0078                                                  | 0.0217 | 0.7185    |
| rs267733    | 1   | 150958836 | missense                                     | ANXA9             | A             | G            | 0.023                                          | 0.004 | 1.80E-08 | -0.0461                                             | 0.0109 | 2.20E-05  | -0.0376                                                | 0.0186 | 0.04376  | -0.0784                                                 | 0.0268 | 0.00346   |
| rs34702488  | 1   | 163256609 | -                                            | NUF2              | A             | T            | 0.026                                          | 0.004 | 1.70E-11 | -0.0213                                             | 0.0101 | 0.03458   | -0.0079                                                | 0.0172 | 0.6444   | -0.0235                                                 | 0.0254 | 0.3563    |
| rs35737316  | 1   | 204161534 | -                                            | -                 | T             | C            | 0.036                                          | 0.004 | 3.50E-27 | 0.0017                                              | 0.0093 | 0.8552    | -0.0075                                                | 0.0161 | 0.6427   | -3.00E-04                                               | 0.0231 | 0.9886    |
| rs10864086  | 1   | 214318748 | intron                                       | RP11-53A1.3       | C             | A            | 0.022                                          | 0.003 | 5.30E-11 | 0.0048                                              | 0.0094 | 0.6047    | 0.0095                                                 | 0.0162 | 0.5582   | -0.0018                                                 | 0.0235 | 0.9384    |
| rs12470971  | 2   | 11725241  | intron                                       | GREB1             | A             | G            | 0.017                                          | 0.003 | 2.60E-08 | 0.0016                                              | 0.0089 | 0.8575    | -0.0089                                                | 0.0154 | 0.5648   | -0.0035                                                 | 0.0223 | 0.8765    |
| rs1260326   | 2   | 27730940  | missense                                     | GCKR              | C             | T            | 0.062                                          | 0.003 | 2.70E-91 | -0.0222                                             | 0.0082 | 0.00657   | -0.0191                                                | 0.0139 | 0.1713   | -0.0224                                                 | 0.0202 | 0.2688    |
| rs6736913   | 2   | 42510018  | missense<br>Non coding<br>transcript<br>exon | EML4              | A             | G            | 0.062                                          | 0.01  | 1.20E-08 | -0.012                                              | 0.0346 | 0.7288    | 0.0332                                                 | 0.0585 | 0.5698   | -0.0553                                                 | 0.087  | 0.5253    |
| rs12614829  | 2   | 64893183  | exon                                         | AC007365.4        | T             | C            | 0.03                                           | 0.004 | 6.10E-17 | -0.0191                                             | 0.0106 | 0.07095   | -0.0372                                                | 0.0182 | 0.04085  | -0.0084                                                 | 0.0262 | 0.7489    |
| rs6750410   | 2   | 70417730  | 5_prime_UTR                                  | C2orf42           | A             | G            | 0.042                                          | 0.006 | 5.20E-12 | 0.041                                               | 0.0159 | 0.01008   | 0.0534                                                 | 0.0273 | 0.05058  | 0.0538                                                  | 0.0402 | 0.1814    |
| rs10192634  | 2   | 180500950 | intron                                       | ZNF385B           | T             | C            | 0.023                                          | 0.003 | 2.00E-11 | 0.0021                                              | 0.0089 | 0.8171    | -0.0052                                                | 0.0153 | 0.7307   | 0.0169                                                  | 0.022  | 0.443     |
| rs2551641   | 2   | 208410267 | intron                                       | CREB1             | C             | T            | 0.022                                          | 0.004 | 7.20E-09 | 0.008                                               | 0.0102 | 0.4351    | 0.0164                                                 | 0.0176 | 0.3519   | 0.0416                                                  | 0.0255 | 0.102     |
| rs2012736   | 2   | 234622379 | missense                                     | UGT1A5            | C             | A            | 0.048                                          | 0.006 | 5.10E-19 | 0.0097                                              | 0.014  | 0.4876    | 0.006                                                  | 0.024  | 0.8018   | -0.0053                                                 | 0.0347 | 0.8793    |
| rs7610366   | 3   | 28810588  | intron                                       | RBMS3             | T             | C            | 0.021                                          | 0.003 | 2.20E-11 | 0.0114                                              | 0.0091 | 0.2102    | 0.0056                                                 | 0.0156 | 0.7221   | 0.0152                                                  | 0.0228 | 0.5051    |
| rs55869022  | 3   | 61656512  | intron                                       | PTPRG             | C             | G            | 0.027                                          | 0.005 | 2.00E-09 | 0.0094                                              | 0.0133 | 0.4787    | -0.0027                                                | 0.023  | 0.9066   | 0.0061                                                  | 0.0321 | 0.8482    |
| rs34040779  | 3   | 107235109 | intergenic                                   | CD200R1L<br>RP11- | T             | C            | 0.034                                          | 0.006 | 5.30E-09 | 0.0794                                              | 0.0158 | 4.58E-07  | 0.0587                                                 | 0.0271 | 0.03022  | 0.1415                                                  | 0.0413 | 0.0006126 |
| rs645040    | 3   | 135926622 | upstream                                     | 463H24.1          | G             | T            | 0.043                                          | 0.004 | 1.50E-35 | -0.0089                                             | 0.0097 | 0.361     | -0.0061                                                | 0.0167 | 0.7162   | -0.0194                                                 | 0.0238 | 0.4156    |
| rs61762319  | 3   | 154801978 | missense                                     | MME               | G             | A            | 0.061                                          | 0.009 | 1.40E-11 | 0.0219                                              | 0.0355 | 0.5377    | -0.0224                                                | 0.0612 | 0.7146   | -0.0134                                                 | 0.089  | 0.8807    |
| rs59194935  | 3   | 172147239 | upstream                                     | BZW1P1            | A             | G            | 0.02                                           | 0.003 | 3.70E-11 | -0.0048                                             | 0.0081 | 0.558     | -0.024                                                 | 0.014  | 0.08666  | -0.0246                                                 | 0.0201 | 0.2217    |
| rs13108218  | 4   | 3443931   | intron                                       | HGFAC             | A             | G            | 0.035                                          | 0.003 | 1.90E-29 | 0.0035                                              | 0.0087 | 0.6829    | 0.0164                                                 | 0.015  | 0.2714   | 0.0141                                                  | 0.0216 | 0.5132    |
| rs7679843   | 4   | 22028079  | intron                                       | RP11-17E2.2       | G             | C            | 0.043                                          | 0.005 | 1.20E-17 | 0.0095                                              | 0.0143 | 0.5054    | -0.0025                                                | 0.0248 | 0.9207   | 0.0182                                                  | 0.0353 | 0.6055    |
| rs7696472   | 4   | 69538180  | upstream                                     | UGT2B15           | A             | G            | 0.038                                          | 0.003 | 1.50E-39 | -0.0027                                             | 0.0089 | 0.7607    | 0.0059                                                 | 0.0155 | 0.7035   | 0.0033                                                  | 0.0223 | 0.8816    |
| rs1441911   | 4   | 77193545  | intron                                       | FAM47E            | G             | T            | 0.022                                          | 0.004 | 5.90E-09 | 0.0089                                              | 0.0099 | 0.3716    | 0.002                                                  | 0.0171 | 0.909    | 0.0358                                                  | 0.0247 | 0.1464    |
| rs11735092  | 4   | 88226231  | 3_prime_UTR                                  | HSD17B13          | T             | C            | 0.037                                          | 0.003 | 9.30E-35 | 0                                                   | 0.0081 | 0.9955    | 0.013                                                  | 0.0139 | 0.3512   | -0.0063                                                 | 0.02   | 0.7517    |
| rs1154401   | 4   | 100009738 | intron                                       | ADH5              | G             | C            | 0.028                                          | 0.003 | 2.90E-18 | -0.002                                              | 0.0085 | 0.8157    | 0.014                                                  | 0.0144 | 0.332    | 0.0058                                                  | 0.021  | 0.7839    |
| rs11099675  | 4   | 148985104 | intron                                       | ARHGAP10          | T             | C            | 0.021                                          | 0.004 | 8.80E-10 | -0.0133                                             | 0.0097 | 0.1717    | 0.0028                                                 | 0.0167 | 0.8672   | -2.00E-04                                               | 0.0243 | 0.9925    |
| rs60701     | 5   | 10733776  | intron                                       | DAP               | C             | T            | 0.019                                          | 0.003 | 4.30E-08 | -0.0078                                             | 0.0092 | 0.3979    | -0.0207                                                | 0.0159 | 0.1927   | -0.0049                                                 | 0.0229 | 0.8322    |
| rs7735249   | 5   | 53310139  | intron                                       | ARL15             | C             | G            | 0.028                                          | 0.005 | 1.80E-09 | 0.0022                                              | 0.0126 | 0.8589    | -0.0202                                                | 0.0217 | 0.3519   | -0.0124                                                 | 0.0314 | 0.6918    |
| rs40270     | 5   | 55804552  | downstream                                   | C5orf67           | A             | C            | 0.022                                          | 0.004 | 2.40E-09 | -0.004                                              | 0.0097 | 0.6837    | -0.0179                                                | 0.0167 | 0.2829   | -0.0035                                                 | 0.0244 | 0.8848    |
| rs112530420 | 5   | 95871370  | intron                                       | CAST              | C             | T            | 0.026                                          | 0.004 | 5.30E-10 | -0.0075                                             | 0.0121 | 0.5365    | -0.0028                                                | 0.0208 | 0.8938   | -0.0112                                                 | 0.0303 | 0.712     |
| rs329122    | 5   | 133864599 | intron                                       | JADE2             | G             | A            | 0.018                                          | 0.003 | 2.90E-09 | -0.0288                                             | 0.008  | 0.0003155 | -0.0366                                                | 0.0136 | 0.007372 | -0.0386                                                 | 0.0198 | 0.05192   |
| rs6870458   | 5   | 137818916 | intergenic                                   | PRELID2           | T             | G            | 0.023                                          | 0.003 | 4.10E-13 | -0.0177                                             | 0.0084 | 0.03505   | -0.0236                                                | 0.0144 | 0.1006   | -0.0409                                                 | 0.0208 | 0.04932   |
| rs1349359   | 5   | 165901446 | intergenic                                   | HMP19             | A             | G            | 0.017                                          | 0.003 | 2.10E-08 | 0.0115                                              | 0.0087 | 0.1835    | 0.0312                                                 | 0.0148 | 0.03524  | 0.0181                                                  | 0.0217 | 0.4034    |
| rs9461224   | 6   | 25936402  | intergenic                                   | ZFP57             | T             | G            | 0.018                                          | 0.003 | 4.00E-10 | -0.0069                                             | 0.0081 | 0.3985    | 0.0112                                                 | 0.0139 | 0.4211   | -0.0021                                                 | 0.0201 | 0.9176    |
| rs543504257 | 6   | 32571403  | intergenic                                   | TBC1D22B          | A             | C            | 0.024                                          | 0.003 | 1.30E-11 | -0.0207                                             | 0.0252 | 0.4117    | -0.0143                                                | 0.0427 | 0.7384   | -0.0015                                                 | 0.07   | 0.983     |
| rs6939861   | 6   | 41703041  | intron                                       | TFEB              | G             | A            | 0.025                                          | 0.003 | 1.70E-12 | -8.00E-04                                           | 0.0093 | 0.9288    | 0.0099                                                 | 0.0162 | 0.5391   | 0.021                                                   | 0.0235 | 0.3719    |
| rs1933801   | 6   | 105365725 | intron                                       | LIN28B-AS1        | T             | C            | 0.038                                          | 0.003 | 7.80E-33 | 0.0089                                              | 0.0085 | 0.293     | -0.0207                                                | 0.0145 | 0.1528   | 0.022                                                   | 0.0209 | 0.2931    |
| rs7773995   | 6   | 154382367 | intron                                       | OPRM1             | C             | T            | 0.024                                          | 0.004 | 1.20E-09 | 5.00E-04                                            | 0.0109 | 0.9649    | 0.0185                                                 | 0.0188 | 0.3271   | -0.0018                                                 | 0.0273 | 0.9488    |

|             |    |           |                       |               |   |   |       |       |           |          |        |           |          |        |          |         |        |          |
|-------------|----|-----------|-----------------------|---------------|---|---|-------|-------|-----------|----------|--------|-----------|----------|--------|----------|---------|--------|----------|
| rs9986829   | 7  | 15019259  | upstream              | DGKB          | A | G | 0.041 | 0.003 | 5.20E-45  | 0.0011   | 0.0085 | 0.8949    | 0.0172   | 0.0145 | 0.2365   | 0.007   | 0.0211 | 0.7408   |
| rs1708302   | 7  | 28198677  | intron                | JAZF1         | T | C | 0.018 | 0.003 | 2.60E-09  | 0.0134   | 0.0079 | 0.09142   | 0.0308   | 0.0136 | 0.02367  | 0.0287  | 0.0197 | 0.1445   |
| rs10279715  | 7  | 40870935  | intron                | SUGCT         | A | G | 0.018 | 0.003 | 9.90E-10  | 0.0412   | 0.0082 | 4.87E-07  | 0.0459   | 0.014  | 0.001002 | 0.0431  | 0.0204 | 0.03434  |
| rs1229498   | 7  | 81568750  | intergenic            | CACNA2D1      | T | G | 0.019 | 0.003 | 6.50E-09  | -0.0057  | 0.0094 | 0.5481    | -0.0054  | 0.0162 | 0.7381   | 0.0318  | 0.0235 | 0.1765   |
| rs7015      | 7  | 97920623  | 3_prime_UTR           | BRI3          | G | A | 0.056 | 0.004 | 7.60E-49  | -0.0612  | 0.0102 | 1.96E-09  | -0.0422  | 0.0175 | 0.01592  | -0.0793 | 0.0251 | 0.001595 |
|             |    |           | Non coding transcript | RP11-115116.1 | G | A |       |       |           |          |        |           |          |        |          |         |        |          |
| rs4841133   | 8  | 9183664   | exon                  | 115116.1      | G | A | 0.031 | 0.005 | 8.90E-10  | -0.0055  | 0.0138 | 0.6893    | -0.0032  | 0.0239 | 0.8949   | 0.0196  | 0.0353 | 0.5789   |
| rs7835492   | 8  | 21089517  | intergenic            | RP11-24P4.1   | C | T | 0.025 | 0.004 | 1.10E-09  | 0.0196   | 0.0113 | 0.08248   | 0.0318   | 0.0194 | 0.1012   | 0.0502  | 0.0279 | 0.07181  |
| rs4871844   | 8  | 22879734  | 3_prime_UTR           | TNFRSF10B     | C | T | 0.017 | 0.003 | 3.10E-08  | -0.0439  | 0.0085 | 2.52E-07  | -0.0299  | 0.0146 | 0.04002  | -0.0566 | 0.0212 | 0.007422 |
| rs10958704  | 8  | 38328302  | upstream              | FGFR1         | A | G | 0.02  | 0.003 | 2.70E-11  | 0.0145   | 0.0083 | 0.07864   | 0.0229   | 0.0144 | 0.1112   | 0.0302  | 0.0207 | 0.1446   |
| rs7844586   | 8  | 61782304  | downstream            | CHD7          | C | T | 0.02  | 0.004 | 1.10E-08  | 0.026    | 0.0096 | 0.006547  | 0.0334   | 0.0164 | 0.04173  | 0.0407  | 0.0235 | 0.08299  |
| rs55867305  | 8  | 77884459  | intergenic            | hsa-mir-3149  | G | A | 0.033 | 0.003 | 1.80E-21  | 6.00E-04 | 0.0097 | 0.9498    | -0.0073  | 0.0166 | 0.6608   | 0.0368  | 0.0248 | 0.1375   |
| rs34955534  | 8  | 81710349  | intron                | ZNF704        | G | A | 0.042 | 0.005 | 4.10E-16  | -0.003   | 0.0139 | 0.8295    | -0.0087  | 0.0238 | 0.7158   | -0.0427 | 0.0338 | 0.2069   |
| rs7828742   | 8  | 116960729 | downstream            | LINC00536     | A | G | 0.017 | 0.003 | 2.50E-08  | -0.0088  | 0.0085 | 0.3034    | -0.0089  | 0.0146 | 0.5418   | 0.0114  | 0.0213 | 0.5928   |
| rs2721195   | 8  | 145677011 | intron                | CYHR1         | T | C | 0.02  | 0.003 | 7.50E-11  | 0.0074   | 0.0084 | 0.3752    | 0.0091   | 0.0145 | 0.5297   | 0.0407  | 0.0211 | 0.05341  |
| rs12336359  | 9  | 4129657   | intron                | GLIS3         | C | G | 0.019 | 0.003 | 1.70E-09  | -0.006   | 0.0085 | 0.4826    | -0.023   | 0.0146 | 0.1146   | -0.0061 | 0.0212 | 0.774    |
| rs112107457 | 9  | 19103774  | upstream              | HAUS6         | T | C | 0.029 | 0.005 | 1.00E-10  | 0.0305   | 0.0122 | 0.01278   | 2.00E-04 | 0.021  | 0.9916   | 0.0326  | 0.0301 | 0.2795   |
| rs3808869   | 9  | 34622389  | missense              | ARID3C        | C | A | 0.017 | 0.003 | 5.40E-09  | 0.0277   | 0.008  | 0.0005217 | 0.0234   | 0.0137 | 0.08781  | 0.0385  | 0.0198 | 0.05154  |
| rs199950405 | 9  | 83271419  | intergenic            | AL353707.1    | C | G | 0.019 | 0.004 | 4.20E-08  | 0.011    | 0.0095 | 0.2456    | 0.0088   | 0.0162 | 0.5881   | 0.0015  | 0.024  | 0.9488   |
| rs10868080  | 9  | 86626769  | intergenic            | RMH1          | T | A | 0.036 | 0.003 | 1.20E-27  | -0.022   | 0.009  | 0.01468   | -0.0263  | 0.0155 | 0.09077  | -0.0136 | 0.0224 | 0.545    |
| rs2090409   | 9  | 108967088 | intron                | LINC01505     | C | A | 0.026 | 0.003 | 2.20E-16  | 0.0015   | 0.0084 | 0.8582    | 0.0051   | 0.0144 | 0.7206   | -0.0264 | 0.0208 | 0.2053   |
| rs10982192  | 9  | 117149417 | intron                | AKNA          | T | C | 0.024 | 0.004 | 6.30E-11  | 0.0257   | 0.0098 | 0.008972  | 0.0454   | 0.0168 | 0.006861 | 0.0212  | 0.0248 | 0.3921   |
| rs13289095  | 9  | 131466489 | intron                | PKN3          | G | T | 0.021 | 0.004 | 4.00E-08  | -0.0079  | 0.0125 | 0.5309    | -0.0083  | 0.0217 | 0.701    | 0.0067  | 0.0313 | 0.8317   |
| rs35182096  | 9  | 137268682 | intron                | RXRA          | C | T | 0.023 | 0.004 | 1.30E-10  | 0.0046   | 0.01   | 0.6462    | 0.037    | 0.0171 | 0.03074  | 0.0322  | 0.0252 | 0.2016   |
| rs79717793  | 10 | 5262267   | downstream            | AKR1C4        | G | A | 0.049 | 0.004 | 9.10E-36  | 0.0163   | 0.011  | 0.1382    | 0.0262   | 0.0188 | 0.1647   | 0.0045  | 0.0271 | 0.8681   |
| rs7912521   | 10 | 67262089  | intergenic            | LINC01515     | C | T | 0.049 | 0.003 | 2.60E-61  | -0.001   | 0.0082 | 0.9003    | 0.0053   | 0.0141 | 0.7085   | -0.0136 | 0.0203 | 0.5039   |
| rs2862954   | 10 | 101912064 | missense              | ERLIN1        | C | T | 0.018 | 0.003 | 5.80E-09  | -0.0079  | 0.0081 | 0.328     | -0.0263  | 0.014  | 0.05925  | -0.0316 | 0.0202 | 0.1173   |
| rs7915430   | 10 | 121660465 | intron                | SEC23IP       | T | G | 0.025 | 0.004 | 2.30E-12  | 0.0026   | 0.0098 | 0.7913    | -0.0024  | 0.0169 | 0.8853   | -0.0176 | 0.0245 | 0.474    |
| rs4757142   | 11 | 13325695  | intron                | ARNTL         | G | A | 0.018 | 0.003 | 6.40E-09  | -0.0105  | 0.0084 | 0.2099    | -0.0052  | 0.0144 | 0.7205   | -0.0123 | 0.0209 | 0.5549   |
| rs10832570  | 11 | 16249510  | intron                | SOX6          | A | G | 0.025 | 0.003 | 1.80E-16  | -0.029   | 0.0083 | 0.0004454 | -0.0237  | 0.0142 | 0.0957   | -0.0836 | 0.0205 | 4.49E-05 |
| rs1994721   | 11 | 29204531  | intron                | RP11-46611.1  | G | A | 0.049 | 0.004 | 1.90E-32  | 0.0142   | 0.0112 | 0.2055    | 0.0098   | 0.0193 | 0.6132   | 0.0453  | 0.0281 | 0.1062   |
| rs11607114  | 11 | 48151287  | intron                | PTPRJ         | C | G | 0.025 | 0.004 | 4.20E-10  | -0.0114  | 0.0112 | 0.3111    | -0.0231  | 0.0194 | 0.2336   | -0.0226 | 0.0276 | 0.412    |
| rs10750766  | 11 | 65473798  | intergenic            | KAT5          | C | A | 0.022 | 0.003 | 1.60E-11  | 0.0029   | 0.0089 | 0.7434    | 0.0032   | 0.0154 | 0.8348   | -0.0246 | 0.0222 | 0.2661   |
| rs631695    | 11 | 69283303  | intron                | AP000439.5    | T | G | 0.024 | 0.003 | 7.20E-17  | 0.0045   | 0.0082 | 0.585     | 0.0148   | 0.0141 | 0.2911   | -0.014  | 0.0203 | 0.489    |
| rs12796488  | 11 | 94131557  | intron                | GPR83         | C | A | 0.041 | 0.004 | 2.00E-26  | 0.0155   | 0.0112 | 0.1669    | 0.0115   | 0.0192 | 0.5485   | 0.0231  | 0.0278 | 0.4063   |
|             |    |           | Non coding transcript | RP11-864G5.1  | A | G |       |       |           |          |        |           |          |        |          |         |        |          |
| rs4754839   | 11 | 102157900 | intergenic            | 864G5.1       | A | G | 0.018 | 0.003 | 1.10E-08  | 1.00E-04 | 0.0088 | 0.9932    | 0.0198   | 0.0153 | 0.1958   | -0.0278 | 0.0227 | 0.2219   |
| rs56196860  | 12 | 2908330   | missense              | FKBP4         | A | C | 0.301 | 0.009 | 1.00E-200 | 0.0353   | 0.0287 | 0.2199    | 0.0583   | 0.0489 | 0.2329   | -0.0455 | 0.0721 | 0.5275   |
| rs73079476  | 12 | 21343833  | intron                | SLCO1B1       | A | C | 0.054 | 0.004 | 4.20E-40  | 0.0026   | 0.0108 | 0.809     | 0.0096   | 0.0185 | 0.6025   | 0.0528  | 0.0272 | 0.05207  |
| rs12320328  | 12 | 25408464  | upstream              | KRAS          | A | G | 0.043 | 0.005 | 2.30E-16  | -0.0183  | 0.0154 | 0.2349    | 0.0076   | 0.0264 | 0.7732   | -0.0333 | 0.039  | 0.3933   |
| rs540730    | 12 | 57807114  | intron                | R3HDM2        | T | C | 0.03  | 0.004 | 3.70E-19  | -0.0061  | 0.0098 | 0.5382    | -0.0119  | 0.0168 | 0.4804   | 0.0385  | 0.0246 | 0.1174   |
| rs2583948   | 12 | 66194613  | intron                | RPSAP52       | A | G | 0.035 | 0.005 | 3.00E-11  | 0.005    | 0.0136 | 0.7157    | 0.0168   | 0.0236 | 0.4765   | 0.0177  | 0.0334 | 0.5962   |
| rs7314285   | 12 | 111522026 | intron                | CUX2          | G | T | 0.039 | 0.006 | 8.80E-12  | 0.0198   | 0.0173 | 0.2519    | 0.0324   | 0.03   | 0.2792   | 0.0723  | 0.0424 | 0.08787  |
| rs3809272   | 12 | 111800258 | 3_prime_UTR           | FAM109A       | A | G | 0.02  | 0.003 | 3.90E-10  | -0.0239  | 0.009  | 0.007835  | -0.0178  | 0.0156 | 0.254    | -0.0415 | 0.0224 | 0.06417  |
| rs2393775   | 12 | 121424574 | intron                | HNF1A         | A | G | 0.026 | 0.003 | 2.70E-17  | -0.013   | 0.0082 | 0.1137    | -0.0239  | 0.0142 | 0.09325  | -0.0041 | 0.0206 | 0.8411   |
| rs7997628   | 13 | 95217852  | intergenic            | TGDS          | A | T | 0.017 | 0.003 | 2.80E-08  | 0.0037   | 0.0084 | 0.659     | -0.0187  | 0.0146 | 0.1996   | -0.001  | 0.0211 | 0.9624   |
| rs2038695   | 13 | 100559123 | intergenic            | CLYBL         | C | A | 0.021 | 0.003 | 1.10E-12  | -0.001   | 0.0097 | 0.9185    | 0.0026   | 0.0164 | 0.872    | -0.0121 | 0.0245 | 0.6195   |
| rs3742223   | 13 | 112725196 | downstream            | SOX1          | T | C | 0.03  | 0.005 | 2.80E-10  | 0.0124   | 0.0144 | 0.3904    | 0.0177   | 0.0249 | 0.4782   | -0.0191 | 0.0356 | 0.5916   |
| rs11621792  | 14 | 24871926  | intron                | NYNRIN        | C | T | 0.018 | 0.003 | 6.70E-09  | 0        | 0.0086 | 0.997     | -0.0107  | 0.0148 | 0.4683   | -0.0132 | 0.0215 | 0.5388   |
| rs2239222   | 14 | 73011885  | intron                | RGS6          | G | A | 0.021 | 0.003 | 1.80E-10  | -0.0033  | 0.0087 | 0.7023    | -0.0056  | 0.0147 | 0.7042   | 0.0321  | 0.0215 | 0.1351   |
| rs72721770  | 14 | 74204686  | intron                | ELMSAN1       | G | C | 0.019 | 0.003 | 1.00E-09  | -0.0059  | 0.0086 | 0.4938    | -0.0351  | 0.0148 | 0.01762  | 0.0067  | 0.0216 | 0.7578   |
| rs28929474  | 14 | 94844947  | missense              | SERPINA1      | T | C | 0.222 | 0.011 | 1.20E-95  | -0.1338  | 0.0302 | 9.61E-06  | 0.0014   | 0.0494 | 0.978    | -0.1834 | 0.0752 | 0.01467  |

|             |    |           |                       |             |   |   |       |       |           |         |        |          |          |        |          |         |        |          |
|-------------|----|-----------|-----------------------|-------------|---|---|-------|-------|-----------|---------|--------|----------|----------|--------|----------|---------|--------|----------|
| rs17580     | 14 | 94847262  | missense              | SERPINA1    | A | T | 0.049 | 0.007 | 1.60E-12  | -0.0093 | 0.0198 | 0.6388   | 0.0257   | 0.0339 | 0.4484   | -0.006  | 0.0468 | 0.8978   |
| rs45490496  | 14 | 105272678 | downstream            | ZBTB42      | A | T | 0.021 | 0.003 | 2.60E-11  | -0.0169 | 0.0085 | 0.04757  | -0.0278  | 0.0148 | 0.06029  | 0.0141  | 0.0213 | 0.5082   |
| rs55707100  | 15 | 43820717  | missense              | MAP1A       | C | T | 0.111 | 0.01  | 1.80E-33  | 0.0406  | 0.0264 | 0.1244   | 0.0537   | 0.047  | 0.2526   | 0.0606  | 0.0659 | 0.3575   |
| rs79391862  | 15 | 53739426  | intergenic            | WDR72       | A | C | 0.157 | 0.013 | 5.60E-38  | 0.1154  | 0.0378 | 0.002246 | 0.0586   | 0.065  | 0.3668   | 0.1262  | 0.1058 | 0.2329   |
| rs7166920   | 15 | 96219503  | intron                | 61O11.1     | A | G | 0.02  | 0.003 | 1.10E-10  | 0.0089  | 0.0081 | 0.2705   | 0.0041   | 0.014  | 0.7719   | 0.0333  | 0.0202 | 0.09918  |
|             |    |           | Non coding transcript | RP11-       |   |   |       |       |           |         |        |          |          |        |          |         |        |          |
| rs56332871  | 15 | 96714816  | exon                  | 327J17.2    | A | C | 0.047 | 0.003 | 1.70E-47  | 0.0208  | 0.0096 | 0.03118  | -0.0029  | 0.0165 | 0.8623   | 0.0601  | 0.0241 | 0.01269  |
| rs841194    | 16 | 4667690   | -                     | MGRN1       | G | A | 0.027 | 0.004 | 6.70E-11  | 0.001   | 0.0113 | 0.9276   | -0.0134  | 0.0192 | 0.4845   | -0.0304 | 0.0282 | 0.281    |
| rs2764772   | 16 | 20060653  | intron                | GPR139      | A | T | 0.032 | 0.003 | 2.50E-24  | 0.0079  | 0.0089 | 0.3713   | 2.00E-04 | 0.0154 | 0.9883   | 0.0734  | 0.0221 | 0.000906 |
| rs1421085   | 16 | 53800954  | intron                | FTO         | T | C | 0.022 | 0.003 | 1.20E-11  | 0.0157  | 0.0082 | 0.05512  | 0.0013   | 0.0141 | 0.924    | -0.0019 | 0.0204 | 0.9262   |
| rs4525526   | 17 | 1650125   | intron                | SERPINF2    | C | T | 0.033 | 0.004 | 2.50E-20  | -0.0229 | 0.01   | 0.02206  | -0.0415  | 0.0172 | 0.016    | -0.048  | 0.025  | 0.05454  |
| rs1799941   | 17 | 7533423   | 5_prime_UTR           | SHBG        | A | G | 0.197 | 0.003 | 1.00E-200 | -0.0025 | 0.0092 | 0.7873   | -0.0079  | 0.0159 | 0.6203   | 0.0141  | 0.0228 | 0.5369   |
| rs2905801   | 17 | 29524974  | intron                | NF1         | T | C | 0.029 | 0.003 | 3.60E-19  | 0.0065  | 0.0088 | 0.4597   | 0.0046   | 0.0152 | 0.7642   | 0.0132  | 0.022  | 0.5481   |
| rs62062271  | 17 | 44091988  | intron                | MAPT        | C | T | 0.031 | 0.004 | 5.40E-18  | -0.0178 | 0.0097 | 0.06767  | -0.0237  | 0.0168 | 0.1572   | -0.053  | 0.0237 | 0.02519  |
| rs28394864  | 17 | 47450775  | intron                | RP11-81K2.1 | G | A | 0.053 | 0.003 | 1.50E-72  | 0.005   | 0.0079 | 0.5319   | 0.0093   | 0.0136 | 0.4964   | 0.0114  | 0.0197 | 0.5613   |
| rs2306216   | 17 | 73240559  | intron                | GGA3        | A | G | 0.027 | 0.004 | 9.20E-12  | 0.01    | 0.0108 | 0.3521   | 0.0068   | 0.0186 | 0.7122   | -0.0492 | 0.0269 | 0.06728  |
| rs7216664   | 17 | 73825664  | -                     | -           | G | A | 0.019 | 0.003 | 2.40E-10  | -0.0104 | 0.0092 | 0.2588   | -0.0029  | 0.0158 | 0.8533   | -0.0298 | 0.023  | 0.196    |
| rs2668776   | 18 | 44750365  | intron                | SKOR2       | C | T | 0.023 | 0.003 | 6.80E-14  | 0.0136  | 0.008  | 0.08917  | 0.0037   | 0.0137 | 0.7861   | 0.0284  | 0.0198 | 0.152    |
| rs1624295   | 19 | 2792034   | intron                | THOP1       | A | G | 0.033 | 0.003 | 7.20E-24  | 0.0187  | 0.0094 | 0.04669  | -0.0041  | 0.016  | 0.7997   | 0.0158  | 0.0237 | 0.5048   |
| rs8107967   | 19 | 7972615   | intron                | MAP2K7      | G | A | 0.019 | 0.003 | 1.70E-10  | 0.0205  | 0.0081 | 0.01173  | 4.00E-04 | 0.014  | 0.9749   | 0.0525  | 0.0204 | 0.01001  |
| rs202200760 | 19 | 17346854  | missense              | NR2F6       | C | G | 0.12  | 0.009 | 8.60E-48  | 0.036   | 0.0197 | 0.06831  | 0.0409   | 0.0345 | 0.2358   | 0.0077  | 0.0494 | 0.8767   |
| rs35824797  | 19 | 19456264  | intron                | MAU2        | C | T | 0.044 | 0.006 | 1.70E-15  | -0.0216 | 0.0157 | 0.1691   | 0.013    | 0.0272 | 0.6327   | 0       | 0.0391 | 0.9991   |
| rs34851490  | 19 | 46384554  | downstream            | IRF2BP1     | G | A | 0.048 | 0.005 | 1.80E-23  | -0.0094 | 0.0129 | 0.4679   | -0.0214  | 0.0223 | 0.3381   | -0.0673 | 0.0318 | 0.03442  |
| rs11671304  | 19 | 47564643  | downstream            | ZC3H4       | C | T | 0.016 | 0.003 | 4.40E-08  | 0.0187  | 0.0086 | 0.02925  | 0.0366   | 0.0148 | 0.01342  | 0.0287  | 0.0214 | 0.1787   |
| rs6073431   | 20 | 43040569  | intron                | HNF4A       | T | C | 0.031 | 0.003 | 5.00E-24  | -0.0029 | 0.0081 | 0.7198   | 6.00E-04 | 0.014  | 0.9657   | -0.0084 | 0.0202 | 0.6768   |
| rs1058319   | 20 | 62374389  | 3_prime_UTR           | SLC2A4RG    | T | C | 0.024 | 0.005 | 1.50E-08  | -0.1261 | 0.0124 | 1.92E-24 | -0.1463  | 0.0216 | 1.37E-11 | -0.1946 | 0.0311 | 3.93E-10 |
| rs575146    | 22 | 24295074  | downstream            | GSTT2B      | G | A | 0.018 | 0.003 | 1.10E-08  | -0.0132 | 0.0088 | 0.1313   | 0.0038   | 0.0152 | 0.8038   | -0.0303 | 0.0219 | 0.1656   |
| rs1033667   | 22 | 29130300  | intron                | CHEK2       | T | C | 0.023 | 0.003 | 9.30E-13  | -0.0184 | 0.0089 | 0.03883  | -0.0146  | 0.0153 | 0.3386   | -0.0108 | 0.0219 | 0.6209   |
| rs738409    | 22 | 44324727  | missense              | PNPLA3      | G | C | 0.051 | 0.004 | 4.30E-43  | -0.022  | 0.01   | 0.02749  | -0.0214  | 0.0171 | 0.2124   | -0.0163 | 0.025  | 0.5143   |
| rs11703376  | 22 | 49678713  | intergenic            | -           | T | C | 0.034 | 0.003 | 2.70E-23  | 0.0163  | 0.0095 | 0.08627  | 0.0148   | 0.0163 | 0.3632   | 0.0381  | 0.0236 | 0.1066   |

\*Aggressive cancer defined as Gleason grade 8+, or prostate cancer death, or metastases or PSA>100 ng/mL. Early-onset defined as diagnosed ≤ 55 years.

Abbreviations: Chr=chromosome; PSA=prostate-specific antigen; SE=standard error; SNP=single nucleotide polymorphism UTR=untranslated region

**Supplementary Table 13: Association of SHBG SNPs used in 2-sample Mendelian randomization analyses with prostate cancer**

| SNP         | Chr | Position  | Consequence | Nearest gene | Effect allele | Other allele | Association parameters with IGF-I |         |           | Association parameters with overall prostate cancer |        |          | Association parameters with aggressive prostate cancer |        |          | Association parameters with early-onset prostate cancer |        |          |
|-------------|-----|-----------|-------------|--------------|---------------|--------------|-----------------------------------|---------|-----------|-----------------------------------------------------|--------|----------|--------------------------------------------------------|--------|----------|---------------------------------------------------------|--------|----------|
|             |     |           |             |              |               |              | Beta                              | SE      | P-value   | Beta                                                | SE     | P-value  | Beta                                                   | SE     | P-value  | Beta                                                    | SE     | P-value  |
| rs36086195  | 1   | 16510894  | intergenic  | ARHGEF19-AS1 | T             | C            | 0.01674                           | 0.00124 | 4.50E-44  | -0.0071                                             | 0.0082 | 0.3885   | -0.002                                                 | 0.0142 | 0.8862   | 0.0167                                                  | 0.0204 | 0.4143   |
| rs114165349 | 1   | 27021913  | intron      | ARID1A       | G             | C            | 0.08711                           | 0.00409 | 3.50E-111 | 0.0242                                              | 0.0277 | 0.3823   | 0.0925                                                 | 0.0487 | 0.05735  | -0.0756                                                 | 0.0695 | 0.277    |
| rs59708846  | 1   | 61687651  | intron      | NFIA         | A             | G            | 0.01949                           | 0.00231 | 7.70E-18  | 0.0183                                              | 0.017  | 0.2809   | 0.0013                                                 | 0.0291 | 0.9651   | -0.0337                                                 | 0.0427 | 0.4307   |
| rs1730865   | 1   | 107605611 | downstream  | PRMT6        | G             | T            | 0.02605                           | 0.00129 | 4.60E-98  | 0.0034                                              | 0.0086 | 0.6913   | -0.0029                                                | 0.0149 | 0.8444   | 0.0029                                                  | 0.0212 | 0.8922   |
| rs72708162  | 1   | 149882811 | intron      | SV2A         | T             | G            | 0.01582                           | 0.00227 | 9.60E-14  | 0.0457                                              | 0.0156 | 0.00341  | 0.0693                                                 | 0.0268 | 0.009741 | 0.0745                                                  | 0.0377 | 0.04797  |
| rs2275560   | 1   | 164529666 | intron      | PBX1         | G             | A            | 0.00723                           | 0.00157 | 3.00E-07  | 0.0191                                              | 0.0118 | 0.106    | 0.019                                                  | 0.0195 | 0.3314   | 0.0031                                                  | 0.0302 | 0.9192   |
| rs12059956  | 1   | 171063262 | intron      | FMO3         | G             | A            | 0.00781                           | 0.00124 | 4.30E-10  | 1.00E-04                                            | 0.0083 | 0.9916   | -0.011                                                 | 0.0143 | 0.4433   | 0.0265                                                  | 0.0209 | 0.2054   |
| rs78444298  | 1   | 184672098 | missense    | EDEM3        | G             | A            | 0.02587                           | 0.00447 | 5.40E-11  | -0.1077                                             | 0.0352 | 0.00225  | -0.0838                                                | 0.0604 | 0.1652   | -0.1252                                                 | 0.089  | 0.1596   |
| rs17583875  | 1   | 197924770 | intergenic  | LHX9         | A             | G            | 0.0242                            | 0.00423 | 2.20E-09  | -0.0122                                             | 0.0286 | 0.6697   | -0.0331                                                | 0.0498 | 0.5064   | 0.0225                                                  | 0.0709 | 0.7509   |
| rs7540115   | 1   | 200265618 | intron      | LINC00862    | C             | A            | 0.00937                           | 0.00159 | 1.10E-09  | -2.00E-04                                           | 0.0109 | 0.9833   | -0.0054                                                | 0.0188 | 0.7748   | 0.0098                                                  | 0.0268 | 0.7134   |
| rs10864086  | 1   | 214318748 | intron      | RP11-53A1.3  | C             | A            | 0.01521                           | 0.00141 | 1.70E-28  | 0.0048                                              | 0.0094 | 0.6047   | 0.0095                                                 | 0.0162 | 0.5582   | -0.0018                                                 | 0.0235 | 0.9384   |
| rs2820441   | 1   | 219734960 | downstream  | RP11-95P13.2 | C             | A            | 0.00741                           | 0.00131 | 2.70E-09  | -0.0137                                             | 0.0087 | 0.1152   | -0.0129                                                | 0.0149 | 0.3868   | -0.0096                                                 | 0.0216 | 0.6577   |
| rs2247213   | 1   | 221055463 | intron      | HLX          | G             | A            | 0.01366                           | 0.0013  | 5.70E-28  | -0.0126                                             | 0.0087 | 0.1494   | -0.0055                                                | 0.015  | 0.7161   | -0.0198                                                 | 0.0218 | 0.3626   |
| rs1870927   | 1   | 226426337 | -           | LIN9         | A             | T            | 0.0065                            | 0.00126 | 6.60E-07  | 0.0211                                              | 0.0086 | 0.01345  | 0.0085                                                 | 0.0147 | 0.5634   | 0.0448                                                  | 0.0214 | 0.03623  |
| rs144647926 | 1   | 235467607 | intron      | ARID4B       | A             | G            | 0.01232                           | 0.00217 | 1.40E-09  | 0.008                                               | 0.0156 | 0.6072   | -0.0142                                                | 0.027  | 0.5998   | 0.0494                                                  | 0.038  | 0.193    |
| rs1260326   | 2   | 27730940  | missense    | GCKR         | C             | T            | 0.03808                           | 0.00125 | 1.00E-200 | -0.0222                                             | 0.0082 | 0.00657  | -0.0191                                                | 0.0139 | 0.1713   | -0.0224                                                 | 0.0202 | 0.2688   |
| rs138529890 | 2   | 32478354  | intron      | NLRC4        | A             | G            | 0.0253                            | 0.00328 | 2.50E-14  | -0.0134                                             | 0.0241 | 0.5792   | -0.0548                                                | 0.0419 | 0.1902   | -0.0478                                                 | 0.0573 | 0.4046   |
| rs6736913   | 2   | 42510018  | missense    | EML4         | A             | G            | 0.03291                           | 0.00424 | 3.00E-15  | -0.012                                              | 0.0346 | 0.7288   | 0.0332                                                 | 0.0585 | 0.5698   | -0.0553                                                 | 0.087  | 0.5253   |
| rs6750410   | 2   | 70417730  | 5 prime UTR | C2orf42      | A             | G            | 0.0182                            | 0.00248 | 9.30E-14  | 0.041                                               | 0.0159 | 0.01008  | 0.0534                                                 | 0.0273 | 0.05058  | 0.0538                                                  | 0.0402 | 0.1814   |
| rs3747647   | 2   | 112245586 | intron      | 2HG          | C             | G            | 0.00827                           | 0.00152 | 8.20E-09  | 0.0175                                              | 0.0129 | 0.1751   | 0.0123                                                 | 0.0221 | 0.5785   | 0.0586                                                  | 0.0327 | 0.07308  |
| rs13389219  | 2   | 165528876 | intron      | COBLL1       | T             | C            | 0.01115                           | 0.00125 | 8.60E-21  | -0.0075                                             | 0.0081 | 0.3512   | 0.0028                                                 | 0.0138 | 0.8367   | -0.0481                                                 | 0.02   | 0.0164   |
| rs72948115  | 2   | 178167086 | intron      | NFE2L2       | C             | T            | 0.01228                           | 0.00209 | 4.70E-09  | 0.0027                                              | 0.0144 | 0.8506   | -0.0287                                                | 0.0246 | 0.2435   | 0.0262                                                  | 0.0354 | 0.4599   |
| rs8176526   | 2   | 188345322 | intron      | TFPI         | C             | T            | 0.00625                           | 0.00138 | 2.00E-06  | -0.0166                                             | 0.0088 | 0.06058  | -0.0143                                                | 0.0151 | 0.3457   | -0.0249                                                 | 0.022  | 0.2564   |
| rs4675682   | 2   | 208402750 | intron      | CREB1        | T             | C            | 0.00895                           | 0.00123 | 3.10E-15  | 0.0036                                              | 0.008  | 0.6546   | 0.0151                                                 | 0.0138 | 0.2735   | 0.0242                                                  | 0.0199 | 0.2234   |
| rs62182125  | 2   | 219274142 | downstream  | CTDSP1       | G             | A            | 0.00612                           | 0.00124 | 5.50E-08  | 7.00E-04                                            | 0.0083 | 0.9325   | 0.008                                                  | 0.0143 | 0.5756   | -0.0119                                                 | 0.0208 | 0.5661   |
| rs12694450  | 2   | 220019638 | intron      | NHEJ1        | T             | C            | 0.00706                           | 0.00136 | 3.80E-08  | -0.0083                                             | 0.0085 | 0.333    | -0.0208                                                | 0.0147 | 0.1587   | -0.0182                                                 | 0.0213 | 0.3943   |
| rs2222018   | 2   | 227095220 | intergenic  | NEU2         | C             | A            | 0.01307                           | 0.00128 | 1.40E-24  | -0.0095                                             | 0.0084 | 0.2566   | 0                                                      | 0.0145 | 0.9978   | -0.0261                                                 | 0.0211 | 0.2149   |
| rs10153800  | 2   | 242179134 | synonymous  | HDLBP        | A             | G            | 0.00674                           | 0.00145 | 5.90E-07  | -0.0079                                             | 0.0094 | 0.4045   | -0.0086                                                | 0.0162 | 0.5968   | -0.0174                                                 | 0.0234 | 0.4568   |
| rs17036326  | 3   | 12389313  | intron      | PPARG        | G             | A            | 0.017                             | 0.00188 | 1.20E-18  | 0.015                                               | 0.0119 | 0.2099   | -0.0093                                                | 0.0206 | 0.6503   | 0.0035                                                  | 0.0303 | 0.9086   |
| rs6792725   | 3   | 24520283  | intron      | THRAB        | G             | A            | 0.01205                           | 0.00137 | 2.10E-21  | -1.00E-04                                           | 0.0094 | 0.9902   | -1.00E-04                                              | 0.0161 | 0.9953   | 0.0269                                                  | 0.0237 | 0.2572   |
| rs2564923   | 3   | 53103262  | intron      | 894J14.5     | A             | G            | 0.0079                            | 0.00124 | 7.80E-12  | 0.0065                                              | 0.008  | 0.4135   | -0.0088                                                | 0.0137 | 0.5226   | -0.0176                                                 | 0.0199 | 0.3745   |
| rs13315174  | 3   | 105406468 | intron      | CBLB         | G             | A            | 0.00736                           | 0.0015  | 5.20E-08  | -0.0159                                             | 0.0098 | 0.1047   | -0.0435                                                | 0.0169 | 0.009792 | -0.0052                                                 | 0.0245 | 0.8307   |
| rs687339    | 3   | 135932359 | intergenic  | KRT18P35     | C             | T            | 0.02755                           | 0.00146 | 1.00E-87  | -0.0097                                             | 0.0097 | 0.3156   | -0.0085                                                | 0.0167 | 0.6093   | -0.0205                                                 | 0.0238 | 0.3887   |
| rs7623513   | 3   | 142100428 | intron      | XRN1         | C             | A            | 0.00937                           | 0.00185 | 3.70E-07  | -0.0261                                             | 0.0117 | 0.02652  | -0.0045                                                | 0.0202 | 0.8225   | -0.0155                                                 | 0.0294 | 0.5968   |
| rs12696304  | 3   | 169481271 | downstream  | ACTRT3       | G             | C            | 0.00813                           | 0.00139 | 1.70E-09  | -0.0243                                             | 0.009  | 0.00685  | -0.0327                                                | 0.0155 | 0.03484  | -0.0319                                                 | 0.0224 | 0.1534   |
| rs79287178  | 3   | 172294500 | intron      | LINC02068    | G             | A            | 0.0397                            | 0.00368 | 3.60E-30  | -0.0129                                             | 0.0245 | 0.5985   | -0.0248                                                | 0.0427 | 0.5605   | 0.02                                                    | 0.0622 | 0.7482   |
| rs7631981   | 3   | 185273510 | upstream    | LIPH         | G             | A            | 0.00692                           | 0.00135 | 4.00E-08  | 1.00E-04                                            | 0.0096 | 0.9941   | 0.0021                                                 | 0.0164 | 0.8969   | -0.0099                                                 | 0.0237 | 0.6766   |
| rs35654957  | 4   | 1010077   | intron      | FGFRL1       | T             | C            | 0.00841                           | 0.00128 | 2.60E-12  | -0.0105                                             | 0.0084 | 0.21     | -0.0082                                                | 0.0144 | 0.5714   | -0.0332                                                 | 0.0208 | 0.1104   |
| rs13108218  | 4   | 3443931   | intron      | HGFAC        | A             | G            | 0.02299                           | 0.00127 | 1.20E-79  | 0.0035                                              | 0.0087 | 0.6829   | 0.0164                                                 | 0.015  | 0.2714   | 0.0141                                                  | 0.0216 | 0.5132   |
| rs11734408  | 4   | 23882519  | 5 prime UTR | PPARGC1A     | G             | A            | 0.00768                           | 0.00135 | 3.30E-10  | -0.0116                                             | 0.009  | 0.2013   | -0.0116                                                | 0.0155 | 0.4551   | -8.00E-04                                               | 0.0228 | 0.9703   |
| rs1349852   | 4   | 69533217  | Intron      | UGT2B15      | C             | A            | 0.02037                           | 0.00124 | 5.90E-67  | -0.0031                                             | 0.0089 | 0.7258   | 0.004                                                  | 0.0156 | 0.7979   | 0.0031                                                  | 0.0225 | 0.8913   |
| rs28507491  | 4   | 77197651  | Intron      | FAM47E       | A             | G            | 0.014                             | 0.00127 | 5.70E-29  | -0.0089                                             | 0.0084 | 0.2889   | -0.0072                                                | 0.0146 | 0.6187   | -0.0301                                                 | 0.021  | 0.1509   |
| rs7694379   | 4   | 88186509  | Intron      | 529H2.1      | G             | A            | 0.02064                           | 0.00124 | 4.00E-66  | -0.0045                                             | 0.0081 | 0.5757   | 0.0081                                                 | 0.014  | 0.5642   | -0.0077                                                 | 0.0201 | 0.7005   |
| rs6831352   | 4   | 100063525 | Intron      | ADH4         | T             | C            | 0.01983                           | 0.00134 | 1.00E-50  | -0.0039                                             | 0.0087 | 0.6508   | 0.0061                                                 | 0.0149 | 0.683    | -0.0111                                                 | 0.0217 | 0.6092   |
| rs7655064   | 4   | 120106348 | Intron      | MYOZ2        | T             | C            | 0.00787                           | 0.00185 | 6.50E-07  | 0.0157                                              | 0.0123 | 0.2027   | 0.0202                                                 | 0.0212 | 0.3418   | -0.0055                                                 | 0.0312 | 0.8596   |
| rs10027275  | 4   | 148981496 | -           | ARHGAP10     | G             | C            | 0.01255                           | 0.00141 | 1.70E-21  | -0.0101                                             | 0.0097 | 0.296    | 0.0087                                                 | 0.0167 | 0.5997   | -0.0021                                                 | 0.0242 | 0.93     |
| rs78890745  | 4   | 159834474 | Intron      | C4orf45      | A             | G            | 0.01365                           | 0.00198 | 8.90E-12  | -0.0045                                             | 0.0144 | 0.7552   | -0.0216                                                | 0.0248 | 0.3846   | -0.0542                                                 | 0.0367 | 0.1404   |
| rs11732763  | 4   | 171010101 | Intron      | AADAT        | A             | G            | 0.01249                           | 0.002   | 3.00E-11  | -0.0285                                             | 0.0146 | 0.05076  | -0.0345                                                | 0.0253 | 0.172    | -0.0246                                                 | 0.036  | 0.4941   |
| rs29681     | 5   | 190639    | Upstream    | LRRC14B      | T             | C            | 0.00862                           | 0.0019  | 6.30E-06  | -0.0046                                             | 0.0128 | 0.7223   | -0.0175                                                | 0.0221 | 0.4286   | -0.0139                                                 | 0.0334 | 0.6784   |
| rs10069690  | 5   | 1279790   | Intron      | TERT         | C             | T            | 0.00663                           | 0.00141 | 8.70E-07  | 0.1332                                              | 0.0094 | 1.44E-45 | 0.1514                                                 | 0.0166 | 8.83E-20 | 0.2083                                                  | 0.0247 | 3.00E-17 |
| rs7735249   | 5   | 53310139  | Intron      | ARL15        | C             | G            | 0.01751                           | 0.00195 | 2.40E-21  | 0.0022                                              | 0.0126 | 0.8589   | -0.0202                                                | 0.0217 | 0.3519   | -0.0124                                                 | 0.0314 | 0.6918   |



|             |    |           |                       |              |   |   |         |         |           |           |        |          |         |        |          |           |        |          |
|-------------|----|-----------|-----------------------|--------------|---|---|---------|---------|-----------|-----------|--------|----------|---------|--------|----------|-----------|--------|----------|
| rs40270     | 5  | 55804552  | downstream            | C5orf67      | A | C | 0.01417 | 0.00147 | 1.30E-22  | -0.004    | 0.0097 | 0.6837   | -0.0179 | 0.0167 | 0.2829   | -0.0035   | 0.0244 | 0.8848   |
| rs11739158  | 5  | 72927292  | Intron                | ARHGEF28     | T | C | 0.00829 | 0.00125 | 2.10E-12  | -0.0023   | 0.0083 | 0.7773   | 0.008   | 0.0142 | 0.576    | 0.0089    | 0.0207 | 0.6656   |
| rs6595447   | 5  | 122750847 | Intron                | CEP120       | T | C | 0.00824 | 0.00157 | 2.90E-07  | 0.0113    | 0.0103 | 0.2761   | 0.0267  | 0.0177 | 0.1319   | 0.0195    | 0.0257 | 0.4483   |
| rs329122    | 5  | 133864599 | Intron                | JADE2        | G | A | 0.00613 | 0.00125 | 4.80E-07  | -0.0288   | 0.008  | 0.00032  | -0.0366 | 0.0136 | 0.007372 | -0.0386   | 0.0198 | 0.05192  |
| rs11743810  | 5  | 137802404 | Intron                | EGR1         | T | C | 0.00894 | 0.00124 | 2.00E-12  | -0.0189   | 0.0084 | 0.02476  | -0.0205 | 0.0144 | 0.1569   | -0.0473   | 0.0209 | 0.02376  |
| rs2431752   | 5  | 162882702 | Intron                | NUDCC2       | A | G | 0.01016 | 0.002   | 7.50E-08  | -0.0153   | 0.0125 | 0.222    | 0.0134  | 0.0215 | 0.5332   | -0.0221   | 0.0317 | 0.4858   |
| rs55646464  | 5  | 173324971 | Intron                | CPEB4        | G | T | 0.00673 | 0.00134 | 3.90E-07  | 0.005     | 0.0087 | 0.5628   | 0.0098  | 0.015  | 0.5152   | -0.0074   | 0.0218 | 0.7359   |
| rs9379084   | 6  | 7231843   | missense              | RREB1        | G | A | 0.01533 | 0.00199 | 1.00E-15  | -0.0199   | 0.0131 | 0.129    | -0.0121 | 0.0226 | 0.5933   | -0.0469   | 0.0321 | 0.144    |
| rs62394490  | 6  | 25934018  | Upstream              | SLC17A2      | T | A | 0.0109  | 0.00126 | 1.90E-20  | -0.0056   | 0.0081 | 0.4889   | 0.0132  | 0.0139 | 0.3444   | -0.0027   | 0.0202 | 0.8916   |
| rs4714001   | 6  | 36638175  | Upstream              | LAP3P2       | G | A | 0.00539 | 0.00128 | 2.90E-06  | 0.0108    | 0.0082 | 0.1878   | 0.0125  | 0.014  | 0.375    | 0.0238    | 0.0203 | 0.241    |
| rs6939861   | 6  | 41703041  | Intron                | TFEB         | G | A | 0.01128 | 0.00142 | 1.10E-15  | -8.00E-04 | 0.0093 | 0.9288   | 0.0099  | 0.0162 | 0.5391   | 0.021     | 0.0235 | 0.3719   |
| rs4715316   | 6  | 52628998  | Upstream              | GSTA2        | T | C | 0.00866 | 0.00129 | 2.00E-13  | -0.003    | 0.0085 | 0.7278   | -0.0168 | 0.0147 | 0.2533   | 0.0129    | 0.0213 | 0.5439   |
| rs17185536  | 6  | 100620931 | Upstream              | RP3-344J20.1 | T | C | 0.00483 | 0.00144 | 0.00014   | 0.0061    | 0.0105 | 0.5604   | 0.0131  | 0.0178 | 0.4644   | -0.0268   | 0.0262 | 0.3054   |
| rs1890426   | 6  | 116338065 | Intron                | FRK          | C | T | 0.00749 | 0.00126 | 2.30E-09  | -0.001    | 0.0081 | 0.8979   | 0.0093  | 0.0139 | 0.5051   | -0.0038   | 0.0203 | 0.8529   |
| rs6900473   | 6  | 130375810 | Intron                | L3MBTL3      | A | G | 0.0089  | 0.00133 | 7.40E-12  | -0.0344   | 0.0087 | 7.82E-05 | -0.0375 | 0.015  | 0.01256  | -0.085    | 0.0218 | 9.38E-05 |
| rs501470    | 6  | 160770918 | Intron                | SLC22A3      | G | T | 0.0152  | 0.00124 | 6.70E-40  | -0.0814   | 0.0079 | 4.66E-25 | -0.0678 | 0.0135 | 5.18E-07 | -0.1262   | 0.0195 | 1.01E-10 |
| rs62442919  | 7  | 1978384   | Intron                | MAD1L1       | A | G | 0.00702 | 0.00128 | 1.10E-09  | -0.0299   | 0.0085 | 0.00045  | -0.0585 | 0.0148 | 8.01E-05 | -0.0417   | 0.0214 | 0.05137  |
| rs2106727   | 7  | 17287998  | intergenic            | AC003075.4   | G | A | 0.00485 | 0.00128 | 2.30E-05  | -0.0064   | 0.0084 | 0.4448   | -0.0042 | 0.0144 | 0.7718   | -0.0137   | 0.0207 | 0.5096   |
| rs860262    | 7  | 28194397  | Intron                | JAZF1        | A | C | 0.00975 | 0.00123 | 2.20E-17  | 0.0107    | 0.0079 | 0.1753   | 0.0266  | 0.0136 | 0.04998  | 0.029     | 0.0196 | 0.1393   |
| rs1799831   | 7  | 44199142  | Intron                | GCK          | C | T | 0.00878 | 0.00169 | 2.90E-07  | -0.0045   | 0.0111 | 0.6884   | 0.006   | 0.0192 | 0.7524   | -0.0512   | 0.0277 | 0.06496  |
| rs73109480  | 7  | 44811221  | downstream            | ZMIZ2        | T | C | 0.01357 | 0.0024  | 2.80E-09  | -0.0215   | 0.0168 | 0.2009   | -0.0042 | 0.0292 | 0.8844   | -0.0545   | 0.0413 | 0.1867   |
| rs12536766  | 7  | 70158864  | Intron                | AUTS2        | T | G | 0.00528 | 0.00125 | 0.00014   | -0.0062   | 0.0086 | 0.4755   | -0.0068 | 0.0151 | 0.6513   | 0.0347    | 0.0216 | 0.1086   |
| rs17145750  | 7  | 73026378  | Intron                | MLXIPL       | T | C | 0.01074 | 0.00167 | 9.70E-11  | -0.0291   | 0.0122 | 0.01722  | 0.0048  | 0.0208 | 0.8179   | -0.0166   | 0.0303 | 0.5825   |
| rs1229492   | 7  | 81564122  | intergenic            | CACNA2D1     | T | C | 0.01147 | 0.0014  | 6.30E-18  | -0.002    | 0.0095 | 0.8352   | 0.0019  | 0.0163 | 0.9055   | 0.0409    | 0.0238 | 0.08626  |
| rs445       | 7  | 92408370  | Intron                | CDK6         | C | T | 0.01405 | 0.0021  | 6.60E-11  | 0.0022    | 0.0139 | 0.8745   | 0.0133  | 0.0242 | 0.5828   | -0.0142   | 0.0344 | 0.6795   |
| rs6950023   | 7  | 97915635  | Intron                | BR13         | G | T | 0.03167 | 0.00158 | 9.90E-96  | -0.0612   | 0.0102 | 1.95E-09 | -0.0416 | 0.0175 | 0.01757  | -0.0794   | 0.0251 | 0.00158  |
| rs184737    | 7  | 116445091 | intergenic            | CAPZA2       | G | A | 0.00827 | 0.00124 | 9.60E-14  | -0.0029   | 0.0081 | 0.7187   | -0.011  | 0.014  | 0.4327   | -0.0312   | 0.0203 | 0.1237   |
| rs157935    | 7  | 130585553 | Intron                | AC058791.1   | G | T | 0.0121  | 0.00134 | 1.50E-22  | -0.0085   | 0.0092 | 0.3554   | 0.0079  | 0.0158 | 0.6141   | 0.0188    | 0.0231 | 0.4144   |
| rs3812275   | 7  | 135064882 | Intron                | CNOT4        | C | A | 0.00677 | 0.00125 | 3.30E-08  | 0.0255    | 0.0087 | 0.00329  | 0.0096  | 0.015  | 0.5224   | 0.0138    | 0.0217 | 0.5267   |
| rs114949263 | 7  | 150498245 | 5 prime UTR           | TMEM176B     | C | T | 0.0188  | 0.00196 | 4.20E-25  | 0.0265    | 0.0139 | 0.05776  | 0.07    | 0.0238 | 0.003249 | 0.051     | 0.0348 | 0.1434   |
|             |    |           | Non coding transcript |              |   |   |         |         |           |           |        |          |         |        |          |           |        |          |
|             |    |           |                       | RP11-        |   |   |         |         |           |           |        |          |         |        |          |           |        |          |
| rs4841133   | 8  | 9183664   | exon                  | H15J16.1     | G | A | 0.02213 | 0.00214 | 1.40E-28  | -0.0055   | 0.0138 | 0.6893   | -0.0032 | 0.0239 | 0.8949   | 0.0196    | 0.0353 | 0.5789   |
| rs876435    | 8  | 22873533  | Intron                | RHOBTB2      | G | A | 0.00757 | 0.00126 | 3.00E-11  | -0.037    | 0.008  | 3.88E-06 | -0.0283 | 0.0137 | 0.03902  | -0.0431   | 0.0198 | 0.02982  |
| rs12543287  | 8  | 42334511  | Intron                | SLC20A2      | C | G | 0.01061 | 0.00128 | 1.90E-18  | 0.0055    | 0.0092 | 0.5483   | 0.0074  | 0.0157 | 0.6372   | 0.0199    | 0.023  | 0.3873   |
| rs10107182  | 8  | 59392737  | Intergenic            | CYP7A1       | T | C | 0.0124  | 0.0013  | 2.80E-22  | -0.0013   | 0.0085 | 0.8814   | -0.0161 | 0.0146 | 0.2722   | -0.0212   | 0.0212 | 0.3172   |
| rs75349541  | 8  | 71152803  | Intron                | NCOA2        | C | T | 0.00887 | 0.00182 | 2.60E-07  | -0.0194   | 0.0119 | 0.1025   | -0.0289 | 0.0206 | 0.1621   | 0.0043    | 0.0298 | 0.8849   |
|             |    |           |                       | RP11-        |   |   |         |         |           |           |        |          |         |        |          |           |        |          |
| rs11994858  | 8  | 81273210  | Intergenic            | 775E10.1     | G | A | 0.01143 | 0.0013  | 1.20E-19  | 0.0034    | 0.0084 | 0.6823   | 0.0063  | 0.0144 | 0.6638   | -0.0138   | 0.0209 | 0.5099   |
| rs2721195   | 8  | 145677011 | Intron                | CYHR1        | T | C | 0.01129 | 0.00124 | 5.30E-21  | 0.0074    | 0.0084 | 0.3752   | 0.0091  | 0.0145 | 0.5297   | 0.0407    | 0.0211 | 0.05341  |
| rs10116426  | 9  | 4145648   | Intron                | GLIS3        | C | A | 0.0089  | 0.00125 | 5.60E-13  | -0.009    | 0.0084 | 0.285    | -0.0249 | 0.0144 | 0.08442  | -0.0093   | 0.0209 | 0.6558   |
| rs820503    | 9  | 6667928   | Intron                | RP11-390F4.6 | C | A | 0.01121 | 0.00179 | 3.70E-11  | -0.0121   | 0.0116 | 0.2982   | -0.0263 | 0.02   | 0.189    | -0.0487   | 0.0288 | 0.09068  |
| rs35234337  | 9  | 35661243  | 3_prime_UTR           | ARHGEF39     | C | T | 0.00761 | 0.00141 | 2.30E-08  | 0.0146    | 0.0094 | 0.1206   | 0.0069  | 0.0163 | 0.6716   | 0.034     | 0.0232 | 0.1439   |
| rs10868080  | 9  | 86626769  | Intergenic            | RMI1         | T | A | 0.02133 | 0.00141 | 1.50E-57  | -0.022    | 0.009  | 0.01468  | -0.0263 | 0.0155 | 0.09077  | -0.0136   | 0.0224 | 0.545    |
| rs56237852  | 9  | 100343212 | Intron                | TMOD1        | C | A | 0.00748 | 0.00162 | 5.70E-06  | 0.0177    | 0.0107 | 0.09769  | 0.0153  | 0.0184 | 0.4056   | 0.0512    | 0.0266 | 0.05463  |
| rs62580766  | 9  | 113034490 | Intergenic            | TXN          | T | C | 0.00961 | 0.0016  | 1.90E-10  | 0.0096    | 0.0111 | 0.3893   | -0.0064 | 0.0192 | 0.7392   | -0.0306   | 0.0276 | 0.2691   |
| rs1570516   | 9  | 119053275 | Intron                | PAPPA        | T | C | 0.00594 | 0.00146 | 1.60E-05  | 0.0258    | 0.0102 | 0.01184  | -0.0084 | 0.0174 | 0.6289   | 0.0332    | 0.0257 | 0.1971   |
| rs9697210   | 9  | 131468740 | Intron                | PKN3         | G | A | 0.01874 | 0.00175 | 1.10E-29  | -0.0077   | 0.0125 | 0.5385   | -0.0082 | 0.0216 | 0.7065   | 0.007     | 0.0312 | 0.8234   |
| rs79717793  | 10 | 5262267   | Downstream            | AKR1C4       | G | A | 0.02461 | 0.00169 | 2.60E-55  | 0.0163    | 0.011  | 0.1382   | 0.0262  | 0.0188 | 0.1647   | 0.0045    | 0.0271 | 0.8681   |
| rs3781085   | 10 | 13370958  | Intron                | SEPHS1       | T | G | 0.00589 | 0.00124 | 1.00E-07  | -0.0064   | 0.0087 | 0.4621   | -0.0297 | 0.0148 | 0.04488  | 0.0083    | 0.0218 | 0.7034   |
| rs3006593   | 10 | 31171626  | Intron                | ZNF438       | C | G | 0.00767 | 0.00126 | 7.90E-10  | -5.00E-04 | 0.0082 | 0.9537   | -0.0054 | 0.0142 | 0.7026   | 0.0257    | 0.0203 | 0.2067   |
| rs34390319  | 10 | 63960611  | Intron                | RTKN2        | C | T | 0.01529 | 0.00205 | 1.40E-12  | 0.0022    | 0.0139 | 0.8725   | -0.0105 | 0.0238 | 0.6606   | -0.0045   | 0.0348 | 0.8975   |
| rs10822153  | 10 | 65056813  | Intron                | JMJD1C       | A | C | 0.06432 | 0.00122 | 1.00E-200 | 0.0026    | 0.008  | 0.7476   | -0.0163 | 0.0139 | 0.2409   | -0.0135   | 0.0201 | 0.5007   |
| rs1782652   | 10 | 81074125  | 3_prime_UTR           | ZMIZ1        | T | A | 0.01274 | 0.00128 | 5.80E-27  | -0.0154   | 0.0088 | 0.07928  | -0.0175 | 0.0151 | 0.2487   | -0.0264   | 0.0219 | 0.2274   |
| rs2259305   | 10 | 93615903  | Intron                | TNKS2        | G | A | 0.01189 | 0.00122 | 2.90E-22  | -0.0134   | 0.0082 | 0.1025   | -0.0116 | 0.0141 | 0.4076   | 0.0169    | 0.0204 | 0.4091   |
| rs856534    | 10 | 94810665  | Intron                | EXOC6        | A | G | 0.01016 | 0.00125 | 6.70E-19  | -0.0053   | 0.0082 | 0.5209   | -0.0176 | 0.0142 | 0.2128   | -3.00E-04 | 0.0205 | 0.9878   |
| rs7096937   | 10 | 113950418 | Intron                | GPAM         | T | C | 0.00947 | 0.00138 | 5.30E-14  | 0.014     | 0.009  | 0.1218   | 0.0106  | 0.0156 | 0.4989   | -0.0032   | 0.0226 | 0.8875   |
| rs1037169   | 11 | 13361005  | Intron                | ARNTL        | T | C | 0.01153 | 0.00133 | 3.70E-20  | -0.0119   | 0.0086 | 0.1628   | -0.0242 | 0.0148 | 0.1018   | 0.0065    | 0.0214 | 0.7616   |
| rs62618693  | 11 | 32956492  | Missense              | QSER1        | T | C | 0.01879 | 0.00295 | 5.20E-11  | 0.0231    | 0.0209 | 0.268    | 0.0579  | 0.0358 | 0.1058   | 0.0105    | 0.0511 | 0.8373   |
| rs12364060  | 11 | 45889775  | Intron                | CRY2         | T | C | 0.00788 | 0.00145 | 1.60E-07  | 0.0076    | 0.0096 | 0.4305   | -0.0026 | 0.0168 | 0.8774   | 3.00E-04  | 0.0243 | 0.9897   |
| rs12797706  | 11 | 65561369  | 5_prime_UTR           | OVOL1        | A | G | 0.01208 | 0.00147 | 6.10E-17  | 0.0118    | 0.0095 | 0.2155   | 0.0173  | 0.0164 | 0.2933   | -0.0031   | 0.0238 | 0.8957   |

|             |    |           |                       |               |   |   |         |         |           |           |        |          |           |        |          |           |        |          |
|-------------|----|-----------|-----------------------|---------------|---|---|---------|---------|-----------|-----------|--------|----------|-----------|--------|----------|-----------|--------|----------|
| rs631695    | 11 | 69283303  | Intron                | AP000439.5    | T | G | 0.01683 | 0.00125 | 8.70E-47  | 0.0045    | 0.0082 | 0.585    | 0.0148    | 0.0141 | 0.2911   | -0.014    | 0.0203 | 0.489    |
| rs10895277  | 11 | 102084940 | Intron                | YAPI          | A | G | 0.00962 | 0.0013  | 8.90E-15  | -0.0044   | 0.0089 | 0.6236   | 0.0054    | 0.0154 | 0.7284   | -3.00E-04 | 0.0231 | 0.989    |
| rs665731    | 11 | 114032484 | Intron                | ZBTB16        | T | C | 0.00652 | 0.00158 | 1.20E-05  | 0.0141    | 0.012  | 0.2397   | 0.0126    | 0.0204 | 0.5376   | 0.0152    | 0.0301 | 0.6127   |
| rs2156805   | 11 | 122610568 | Intron                | UBASH3B       | G | A | 0.00538 | 0.00124 | 1.40E-06  | -0.013    | 0.008  | 0.104    | -0.0153   | 0.0137 | 0.263    | -0.0121   | 0.0198 | 0.541    |
| rs56196860  | 12 | 2908330   | Missense              | FKBP4         | A | C | 0.02193 | 0.00352 | 6.60E-11  | 0.0353    | 0.0287 | 0.2199   | 0.0583    | 0.0489 | 0.2329   | -0.0455   | 0.0721 | 0.5275   |
| rs76895963  | 12 | 4384844   | Intron                | CCND2         | G | T | 0.05541 | 0.00474 | 2.40E-33  | 0.0383    | 0.0317 | 0.2271   | 0.0422    | 0.0551 | 0.4439   | 0.0013    | 0.0783 | 0.987    |
| rs1871395   | 12 | 21352315  | Intron                | SLCO1B1       | A | G | 0.0325  | 0.00171 | 4.60E-88  | 0.0024    | 0.0105 | 0.8163   | 0.0027    | 0.018  | 0.8801   | 0.0536    | 0.0268 | 0.04564  |
| rs75130744  | 12 | 25410741  | Intergenic            | KRAS          | G | C | 0.0296  | 0.00239 | 3.10E-39  | -0.0018   | 0.017  | 0.9182   | 0.0307    | 0.0292 | 0.2939   | -0.0288   | 0.0426 | 0.4991   |
| rs12818938  | 12 | 53783182  | -                     | -             | T | G | 0.0095  | 0.00167 | 1.00E-08  | -0.0157   | 0.0109 | 0.1517   | -0.0246   | 0.0186 | 0.1869   | -0.0179   | 0.0272 | 0.5103   |
| rs540730    | 12 | 57807114  | Intron                | R3HDM2        | T | C | 0.01772 | 0.00143 | 4.90E-39  | -0.0061   | 0.0098 | 0.5382   | -0.0119   | 0.0168 | 0.4804   | 0.0385    | 0.0246 | 0.1174   |
| rs61929307  | 12 | 69997422  | Downstream            | CC22          | G | T | 0.00667 | 0.0013  | 1.30E-07  | -0.0131   | 0.0083 | 0.1163   | -0.0137   | 0.0143 | 0.3392   | -0.0409   | 0.0208 | 0.04888  |
| rs11111274  | 12 | 102838128 | Intron                | IGF1          | G | A | 0.00731 | 0.00139 | 4.60E-08  | 0.0238    | 0.0089 | 0.00768  | 0.0273    | 0.0153 | 0.07392  | 0.0579    | 0.0219 | 0.008388 |
| rs7314285   | 12 | 111522026 | Intron                | CUX2          | G | T | 0.03012 | 0.00244 | 1.50E-41  | 0.0198    | 0.0173 | 0.2519   | 0.0324    | 0.03   | 0.2792   | 0.0723    | 0.0424 | 0.08787  |
| rs9738226   | 12 | 121423659 | Intron                | HNF1A         | G | A | 0.01941 | 0.00127 | 5.20E-54  | -0.0134   | 0.0082 | 0.1045   | -0.0242   | 0.0142 | 0.08926  | -0.0033   | 0.0206 | 0.8724   |
| rs41284816  | 13 | 50655989  | Upstream              | DLEU1         | T | G | 0.01965 | 0.00462 | 1.90E-06  | -0.0257   | 0.0265 | 0.3319   | 0.0109    | 0.0449 | 0.8085   | -0.0646   | 0.0683 | 0.3442   |
| rs116338429 | 13 | 114767040 | Intron                | RASA3         | T | C | 0.00986 | 0.00173 | 1.30E-09  | -0.0097   | 0.0117 | 0.4068   | 0.0027    | 0.0202 | 0.8934   | -0.0311   | 0.029  | 0.2841   |
| rs11621792  | 14 | 24871926  | Intron                | NYNRIN        | C | T | 0.01275 | 0.00124 | 1.40E-25  | 0         | 0.0086 | 0.997    | -0.0107   | 0.0148 | 0.4683   | -0.0132   | 0.0215 | 0.5388   |
| rs72683923  | 14 | 50735947  | Synonymous            | L2HGDH        | C | T | 0.03398 | 0.00444 | 3.00E-16  | 0.0362    | 0.0351 | 0.3017   | -0.0761   | 0.0619 | 0.2188   | -0.1214   | 0.0937 | 0.195    |
| rs2239222   | 14 | 73011885  | Intron                | RGS6          | G | A | 0.01106 | 0.0013  | 5.50E-17  | -0.0033   | 0.0087 | 0.7023   | -0.0056   | 0.0147 | 0.7042   | 0.0321    | 0.0215 | 0.1351   |
| rs13379043  | 14 | 74250126  | Intron                | ELMSAN1       | C | T | 0.00829 | 0.0014  | 2.20E-10  | -8.00E-04 | 0.0095 | 0.9305   | -0.0061   | 0.0163 | 0.7093   | 0.0635    | 0.0231 | 0.005971 |
| rs28929474  | 14 | 94844947  | Missense              | SERPINA1      | T | C | 0.01383 | 0.00442 | 1.00E-200 | -0.1338   | 0.0302 | 9.61E-06 | 0.0014    | 0.0494 | 0.978    | -0.1834   | 0.0752 | 0.01467  |
| rs3742366   | 14 | 104198351 | Intron                | ZFYVE21       | C | T | 0.00918 | 0.0013  | 3.70E-14  | 0.0228    | 0.0084 | 0.00656  | 0.01      | 0.0143 | 0.4844   | 0.0335    | 0.0209 | 0.1081   |
| rs28562483  | 15 | 31660799  | Intron                | KLF13         | G | T | 0.01058 | 0.00186 | 4.90E-08  | -0.0233   | 0.0129 | 0.07131  | -0.0238   | 0.022  | 0.2806   | -0.0523   | 0.0324 | 0.1069   |
| rs143974673 | 15 | 44027885  | Intron                | CATSPER2P1    | T | C | 0.07389 | 0.00394 | 3.00E-84  | 0.0346    | 0.0268 | 0.1957   | 0.0643    | 0.0477 | 0.1775   | 0.0501    | 0.0672 | 0.4558   |
| rs149624078 | 15 | 53728710  | Intergenic            | WDR72         | C | T | 0.09758 | 0.00544 | 5.40E-81  | 0.1139    | 0.0377 | 0.00254  | 0.0625    | 0.065  | 0.3358   | 0.1255    | 0.1057 | 0.2349   |
| rs56187480  | 15 | 63789479  | Downstream            | AC007950.2    | G | A | 0.01266 | 0.0013  | 1.30E-25  | -0.0024   | 0.0085 | 0.7772   | -0.0203   | 0.0146 | 0.1641   | 0.0116    | 0.0212 | 0.5849   |
| rs8038465   | 15 | 73978337  | Intron                | CD276         | T | C | 0.00618 | 0.00125 | 5.20E-08  | 0.009     | 0.0084 | 0.2854   | 0.0158    | 0.0144 | 0.272    | 0.0068    | 0.0208 | 0.7455   |
| rs72753908  | 15 | 83334856  | Intron                | AP3B2         | C | T | 0.01085 | 0.00236 | 1.80E-06  | -1.00E-04 | 0.0159 | 0.9972   | 0.0206    | 0.0274 | 0.4527   | -0.0541   | 0.0386 | 0.1617   |
| rs11856926  | 15 | 96223649  | Intron                | RP11-61O11.1  | G | A | 0.01159 | 0.00125 | 1.90E-22  | 0.0056    | 0.0081 | 0.4902   | -8.00E-04 | 0.0141 | 0.9567   | 0.0267    | 0.0204 | 0.1898   |
| rs56332871  | 15 | 96714816  | Non coding transcript | RP11-327J17.2 | A | C | 0.02983 | 0.00139 | 4.20E-111 | 0.0208    | 0.0096 | 0.03118  | -0.0029   | 0.0165 | 0.8623   | 0.0601    | 0.0241 | 0.01269  |
| rs36108764  | 16 | 4624130   | exon                  | C16orf96      | G | A | 0.00953 | 0.00156 | 1.80E-10  | -0.0065   | 0.0111 | 0.5593   | -0.0191   | 0.0188 | 0.3099   | -0.0394   | 0.0278 | 0.1566   |
| rs12928099  | 16 | 15150505  | Intron                | PDXDC1        | A | C | 0.00913 | 0.00136 | 1.20E-11  | 0.0224    | 0.0093 | 0.01528  | 0.0344    | 0.0159 | 0.03016  | 0.0405    | 0.023  | 0.07784  |
| rs2288004   | 16 | 31054040  | Downstream            | STX4          | G | C | 0.00701 | 0.00127 | 1.10E-08  | -0.0123   | 0.0081 | 0.1293   | -0.0145   | 0.0139 | 0.2957   | -0.0147   | 0.0202 | 0.4679   |
| rs28650012  | 16 | 80497341  | Intron                | RP11-525K10.3 | G | C | 0.00712 | 0.00138 | 2.50E-09  | 0.013     | 0.0091 | 0.1523   | -0.0084   | 0.0157 | 0.5923   | 0.0046    | 0.0226 | 0.8396   |
| rs1799941   | 17 | 7533423   | 5_prime_UTR           | SHBG          | A | G | 0.12077 | 0.00136 | 1.00E-200 | -0.0025   | 0.0092 | 0.7873   | -0.0079   | 0.0159 | 0.6203   | 0.0141    | 0.0228 | 0.5369   |
| rs12950562  | 17 | 17995166  | Intron                | DRG2          | T | C | 0.01102 | 0.00123 | 7.40E-21  | -0.025    | 0.0081 | 0.0019   | -0.0158   | 0.0138 | 0.2508   | -0.0787   | 0.02   | 8.33E-05 |
| rs2905801   | 17 | 29524974  | Intron                | NF1           | T | C | 0.01401 | 0.00131 | 3.80E-28  | 0.0065    | 0.0088 | 0.4597   | 0.0046    | 0.0152 | 0.7642   | 0.0132    | 0.022  | 0.5481   |
| rs11655704  | 17 | 47448172  | Non coding transcript | RP11-81K2.1   | C | T | 0.03116 | 0.00128 | 4.90E-136 | 0.0445    | 0.0086 | 2.44E-07 | 0.041     | 0.0148 | 0.005607 | 0.0431    | 0.0213 | 0.04279  |
| rs1801689   | 17 | 64210580  | exon                  | APOH          | A | C | 0.03343 | 0.00351 | 1.80E-21  | 0.0257    | 0.0243 | 0.2919   | 0.053     | 0.0436 | 0.2237   | 0.1096    | 0.0604 | 0.06985  |
| rs7210574   | 17 | 73824121  | Missense              | UNC13D        | C | T | 0.00977 | 0.00127 | 8.10E-16  | -0.0069   | 0.0092 | 0.4502   | 0.0052    | 0.0157 | 0.7434   | -0.0277   | 0.0229 | 0.2268   |
| rs36013981  | 17 | 79493307  | Synonymous            | FSCN2         | A | G | 0.00674 | 0.00122 | 3.80E-10  | 0.0137    | 0.0083 | 0.1012   | 0.0254    | 0.0144 | 0.07702  | 0.0039    | 0.0207 | 0.8512   |
| rs55855238  | 18 | 55089715  | Upstream              | RP11-714M23.2 | C | T | 0.00858 | 0.0013  | 3.80E-13  | -0.0086   | 0.0088 | 0.3297   | -0.032    | 0.0151 | 0.03448  | -0.0046   | 0.0222 | 0.8353   |
| rs1788641   | 18 | 71949629  | intron                | CYB5A         | A | G | 0.00715 | 0.00134 | 2.00E-07  | 0.0087    | 0.0088 | 0.3224   | 0.0271    | 0.0152 | 0.07526  | 0.0056    | 0.0218 | 0.7985   |
| rs1640267   | 19 | 2789337   | intron                | THOP1         | C | T | 0.01729 | 0.00136 | 5.90E-41  | 0.021     | 0.0098 | 0.03127  | -5.00E-04 | 0.0166 | 0.9743   | 0.0193    | 0.0246 | 0.4311   |
| rs60018147  | 19 | 3375572   | intron                | NFIC          | G | A | 0.01315 | 0.00198 | 1.00E-12  | -0.0063   | 0.0165 | 0.7007   | -0.0461   | 0.0285 | 0.1055   | 0.0215    | 0.0417 | 0.6068   |
| rs202200760 | 19 | 17346854  | missense              | NR2F6         | C | G | 0.0711  | 0.00349 | 3.70E-98  | 0.036     | 0.0197 | 0.06831  | 0.0409    | 0.0345 | 0.2358   | 0.0077    | 0.0494 | 0.8767   |
| rs35824797  | 19 | 19456264  | intron                | MAU2          | C | T | 0.01565 | 0.00229 | 1.10E-14  | -0.0216   | 0.0157 | 0.1691   | 0.013     | 0.0272 | 0.6327   | 0         | 0.0391 | 0.9991   |
| rs45512696  | 19 | 35550878  | intron                | HPN           | T | C | 0.02057 | 0.00162 | 1.10E-41  | -0.0012   | 0.012  | 0.9237   | 0.0302    | 0.0203 | 0.1367   | -0.0312   | 0.03   | 0.2992   |
| rs11666245  | 19 | 38229926  | missense              | ZNF573        | G | A | 0.01633 | 0.0029  | 2.20E-09  | 0.0027    | 0.0192 | 0.8899   | -0.0547   | 0.0329 | 0.09653  | -0.0791   | 0.047  | 0.09215  |
| rs34255979  | 19 | 46384830  | downstream            | IRF2BP1       | T | C | 0.02725 | 0.00191 | 4.00E-51  | -0.0068   | 0.0127 | 0.5894   | -0.0219   | 0.022  | 0.318    | -0.0569   | 0.0312 | 0.068    |
| rs111981233 | 19 | 50016479  | 5_prime_UTR           | FCGRT         | G | T | 0.02216 | 0.00228 | 8.20E-33  | 0.0391    | 0.0154 | 0.01129  | -1.00E-04 | 0.0267 | 0.9961   | 0.0209    | 0.0382 | 0.5841   |
| rs13042148  | 20 | 32298286  | intron                | PXMP4         | C | T | 0.01245 | 0.00171 | 1.40E-14  | 0.0394    | 0.0113 | 0.00047  | 0.0108    | 0.0195 | 0.5788   | 0.0974    | 0.0283 | 0.000584 |
| rs4812336   | 20 | 37547374  | 3_prime_UTR           | PPP1R16B      | A | G | 0.00772 | 0.00134 | 9.20E-09  | -0.0062   | 0.009  | 0.4914   | 0.0038    | 0.0155 | 0.8039   | -0.0081   | 0.0224 | 0.7159   |
| rs3746575   | 20 | 43058096  | intron                | HNF4A         | G | C | 0.01749 | 0.00128 | 2.20E-43  | -0.0057   | 0.0084 | 0.4985   | -0.0089   | 0.0144 | 0.5393   | 0.0046    | 0.0208 | 0.8258   |

|            |    |          |             |               |   |   |         |         |          |         |        |          |         |        |          |         |        |          |
|------------|----|----------|-------------|---------------|---|---|---------|---------|----------|---------|--------|----------|---------|--------|----------|---------|--------|----------|
| rs78319058 | 20 | 49020571 | intergenic  | RP13-379L11.3 | T | C | 0.02487 | 0.0042  | 4.20E-10 | 0.0434  | 0.0296 | 0.1436   | 0.0856  | 0.0515 | 0.09628  | 0.1573  | 0.0728 | 0.03062  |
| rs1058319  | 20 | 62374389 | 3_prime_UTR | SLC2A4RG      | T | C | 0.00923 | 0.00185 | 1.60E-07 | -0.1261 | 0.0124 | 1.92E-24 | -0.1463 | 0.0216 | 1.37E-11 | -0.1946 | 0.0311 | 3.93E-10 |
| rs2234694  | 21 | 33038865 | intron      | SOD1          | A | C | 0.013   | 0.00301 | 6.70E-07 | 0.026   | 0.0194 | 0.18     | 0.0243  | 0.0333 | 0.4655   | -0.0331 | 0.0503 | 0.5107   |
| rs6005840  | 22 | 29101357 | intron      | CHEK2         | A | G | 0.01687 | 0.00132 | 4.00E-39 | -0.0085 | 0.0087 | 0.3287   | -0.0059 | 0.0149 | 0.6945   | 0.0102  | 0.0213 | 0.6317   |
| rs738409   | 22 | 44324727 | missense    | PNPLA3        | G | C | 0.03096 | 0.0015  | 1.80E-96 | -0.022  | 0.01   | 0.02749  | -0.0214 | 0.0171 | 0.2124   | -0.0163 | 0.025  | 0.5143   |

\*Aggressive cancer defined as Gleason grade 8+, or prostate cancer death, or metastases or PSA>100 ng/mL. Early-onset defined as diagnosed ≤55 years.

Abbreviations: Chr=chromosome; SE=standard error; SHBG=sex hormone binding globulin; SNP=single nucleotide polymorphism UTR=untranslated region.

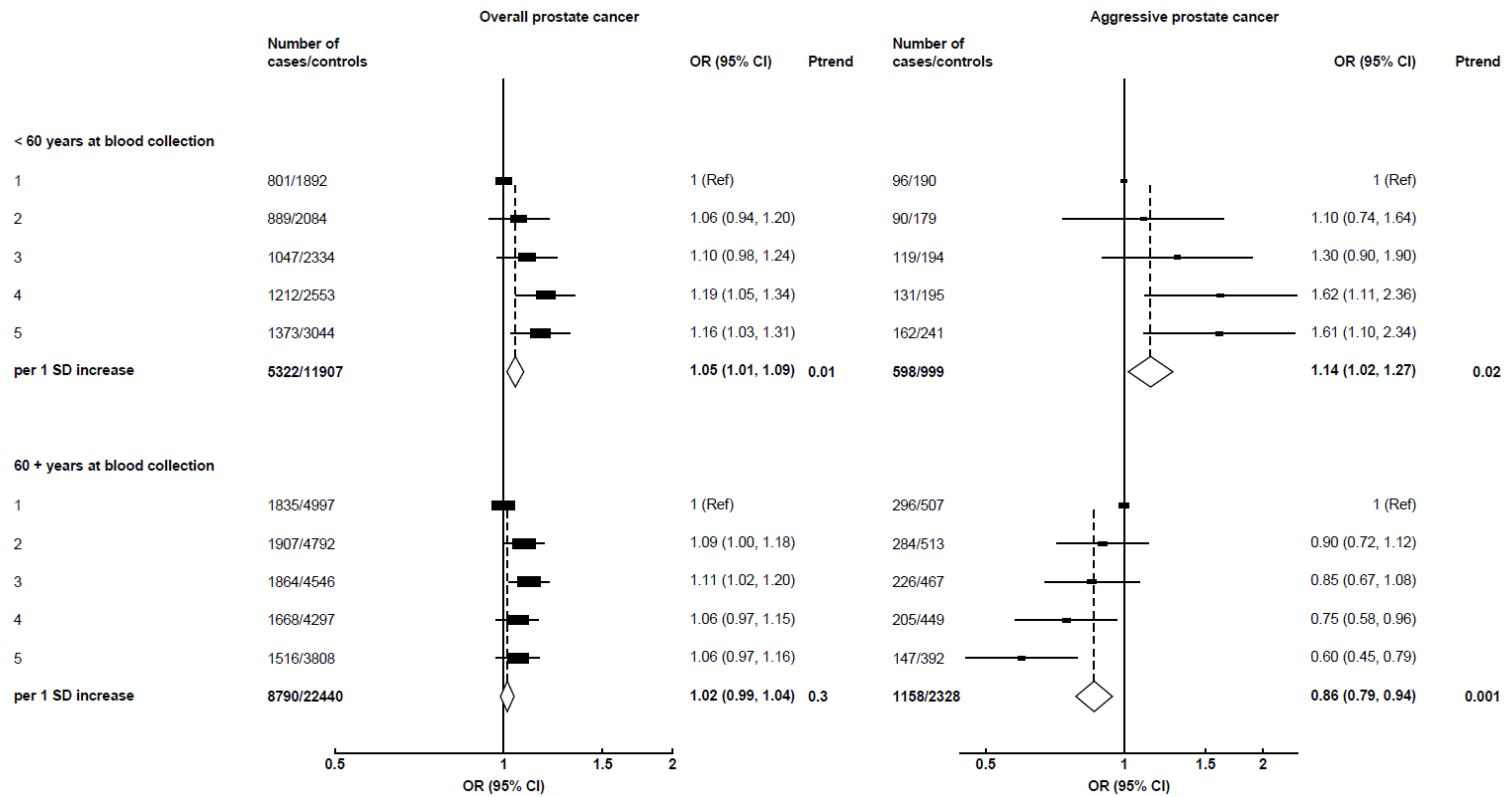

**Supplementary Figure 1:** Risks of overall and aggressive\* prostate cancer in by study-specific fifths of free testosterone concentrations and per 1 SD increment, stratified by age at blood collection. Blood-based estimates are from logistic regression conditioned on the matching variables and adjusted for age, BMI, height, alcohol intake, smoking status, marital status, education status, racial/ethnic group, and diabetes status. The position of each square indicates the magnitude of the OR, and the area of the square is proportional to the inverse of the variance of the logarithm of the OR. The length of the horizontal line through the square indicates the 95% confidence interval.

\*Aggressive cancer defined as Gleason grade 8+, or prostate cancer death, or metastases or PSA >100 ng/mL.

Abbreviations: BMI=body mass index; CI=confidence interval; OR=odds ratio; PSA=prostate-specific antigen; SD=standard deviation.

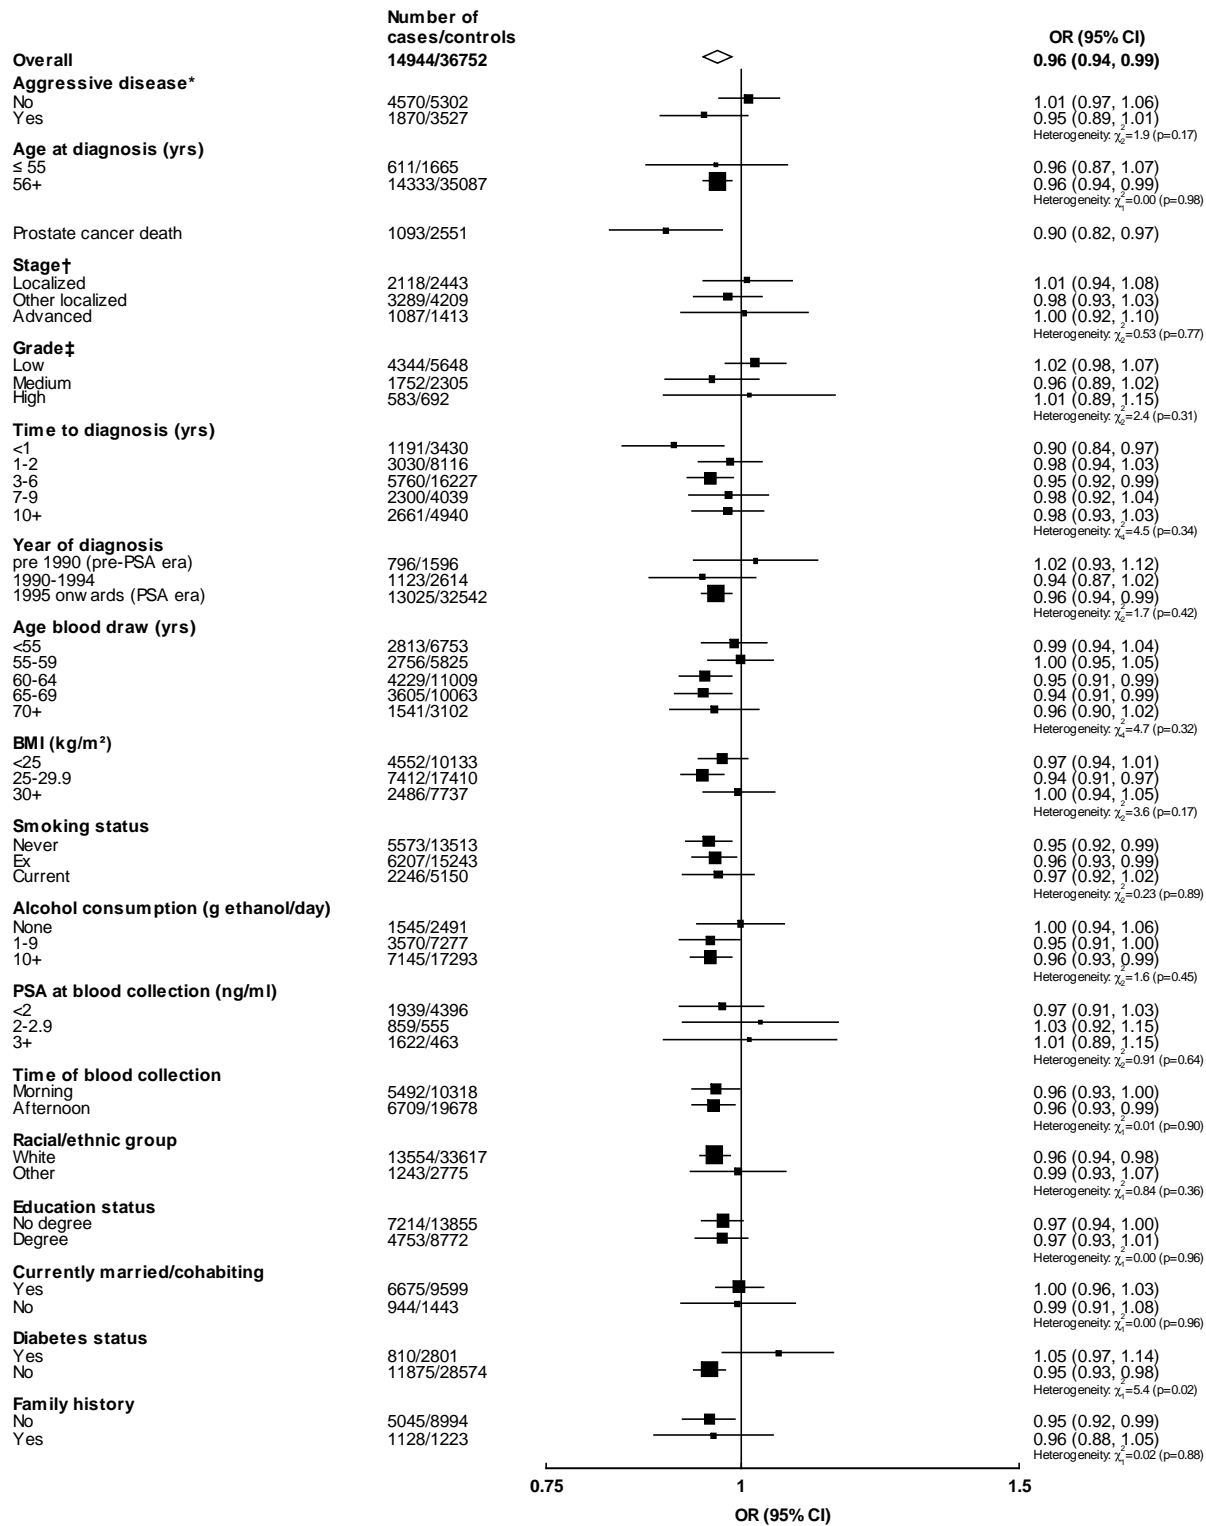

**Supplementary Figure 2:** Odds ratio (95% CIs) for overall prostate cancer per study-specific 1 SD increment of total testosterone concentration by subgroup

Estimates are from logistic regression conditioned on the matching variables and adjusted for age, BMI, height, alcohol intake, smoking status, marital status, education status, racial/ethnic group, and diabetes status. The position of each square indicates the magnitude of the OR, and the area of the square is proportional to the inverse of the variance of the logarithm of the OR. The length of the horizontal line through the square indicates the 95% confidence interval. Tests for heterogeneity for case-defined factors were obtained by fitting separate models for each subgroup and assuming independence of the ORs using a method analogous to a meta-analysis. Tests for heterogeneity for non-case-defined factors were assessed with a  $\chi^2$  test of interaction between subgroup and the binary variable

\*Aggressive cancer defined as Gleason grade 8+, or prostate cancer death, or metastases or PSA >100 ng/mL

†Localized defined as TNM stage <T2 with no reported lymph node involvement or metastases or stage I; other localized stage if TNM stage T2 with no reported lymph node involvement or metastases, stage II, or equivalent; advanced stage if they were TNM stage T3 or T4 and/or N1+ and/or M1, stage III–IV, or equivalent.

‡ Low grade defined as Gleason score was <7 or equivalent (i.e. extent of differentiation good, moderate); medium grade if Gleason score was 7 (i.e. poorly differentiated); high grade if the Gleason score was ≥8 or equivalent (i.e. undifferentiated).

Abbreviations: BMI=body mass index; CI=confidence interval; OR=odds ratio; PSA=prostate-specific antigen; SD=standard deviation; TNM=tumour, node, metastasis

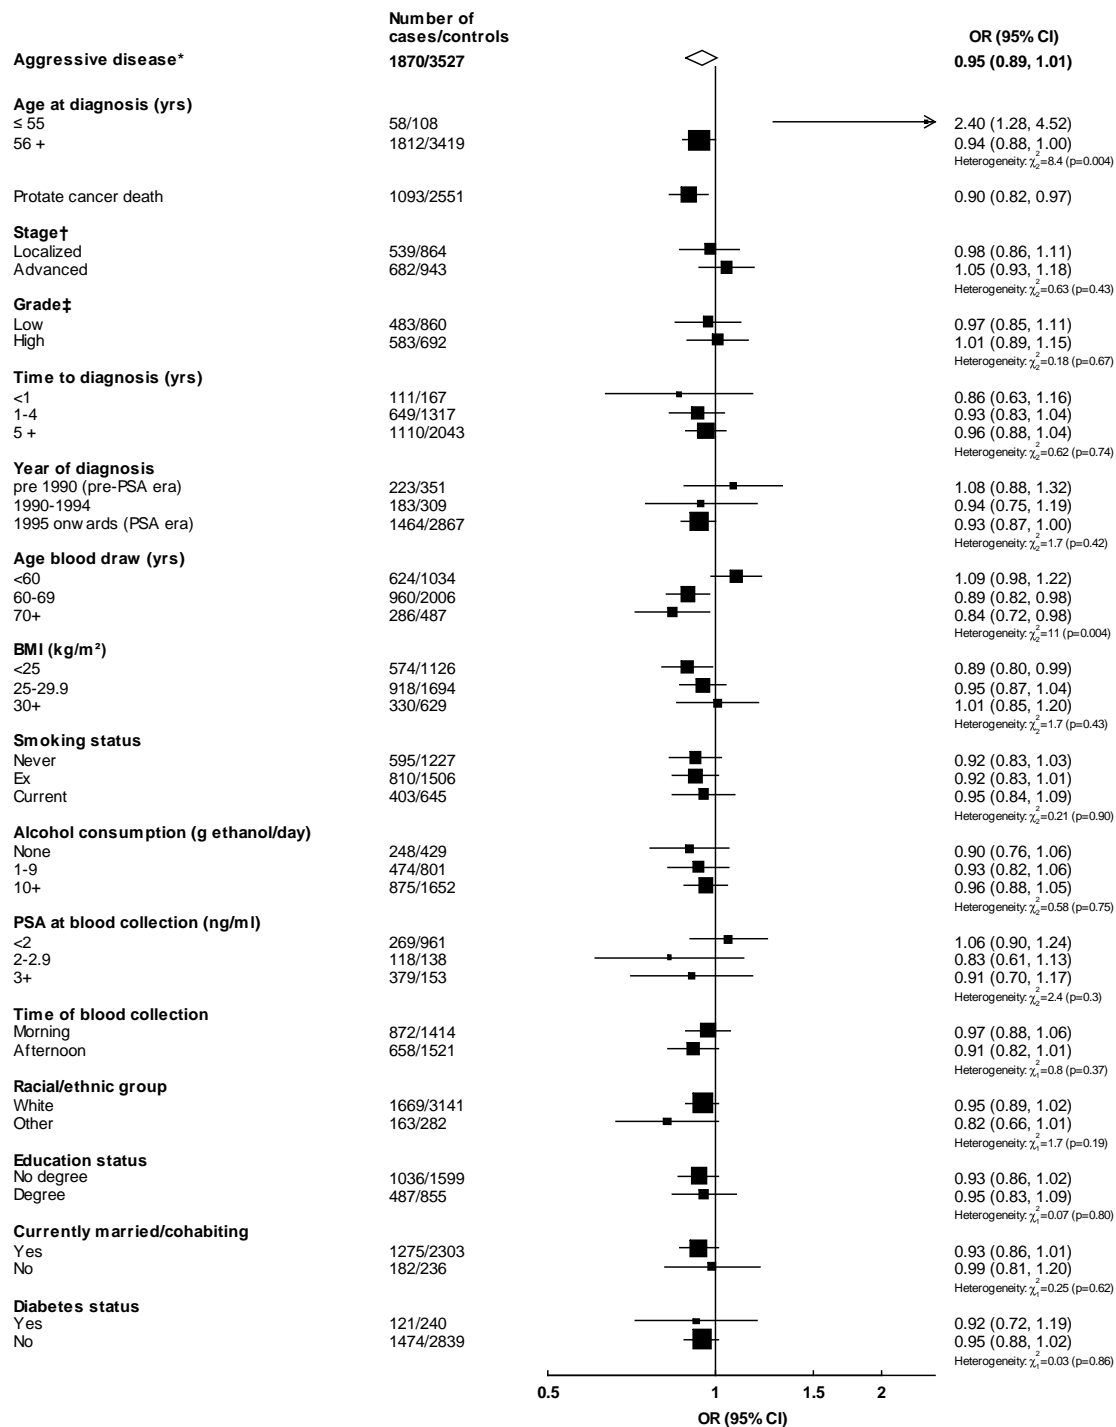

**Supplementary Figure 3:** Odds ratio (95% CIs) for aggressive\* prostate cancer per study-specific 1 SD increment of total testosterone concentration by subgroup

Estimates are from logistic regression conditioned on the matching variables and adjusted for age, BMI, height, alcohol intake, smoking status, marital status, education status, racial/ethnic group, and diabetes status. The position of each square indicates the magnitude of the OR, and the area of the square is proportional to the inverse of the variance of the logarithm of the OR. The length of the horizontal line through the square indicates the 95% confidence interval. Tests for heterogeneity for case-defined factors were obtained by fitting separate models for each subgroup and assuming independence of the ORs using a method analogous to a meta-analysis. Tests for heterogeneity for non-case-defined factors were assessed with a  $\chi^2$  test of interaction between subgroup and the binary variable

\*Aggressive cancer defined as Gleason grade 8+, or prostate cancer death, or metastases or PSA >100 ng/mL

†Localized defined as TNM stage <T2 with no reported lymph node involvement or metastases or stage I, or TNM stage T2 with no reported lymph node involvement or metastases, stage II, or equivalent; advanced stage if they were TNM stage T3 or T4 and/or N1+ and/or M1, stage III–IV, or equivalent. Men with localized aggressive disease will have had high-grade prostate cancer, PSA > 100 ng/mL or died from prostate cancer.

‡ Low grade defined as Gleason score was <8 or equivalent (i.e., extent of differentiation good, moderate, poor); high grade if the Gleason score was  $\geq 8$  or equivalent (i.e., undifferentiated). Men with low-grade aggressive disease will have had advanced prostate cancer, PSA > 100 ng/mL or died from prostate cancer.

Abbreviations: BMI=body mass index; CI=confidence interval; OR=odds ratio; PSA=prostate-specific antigen; SD=standard deviation; TNM=tumour, node, metastasis.

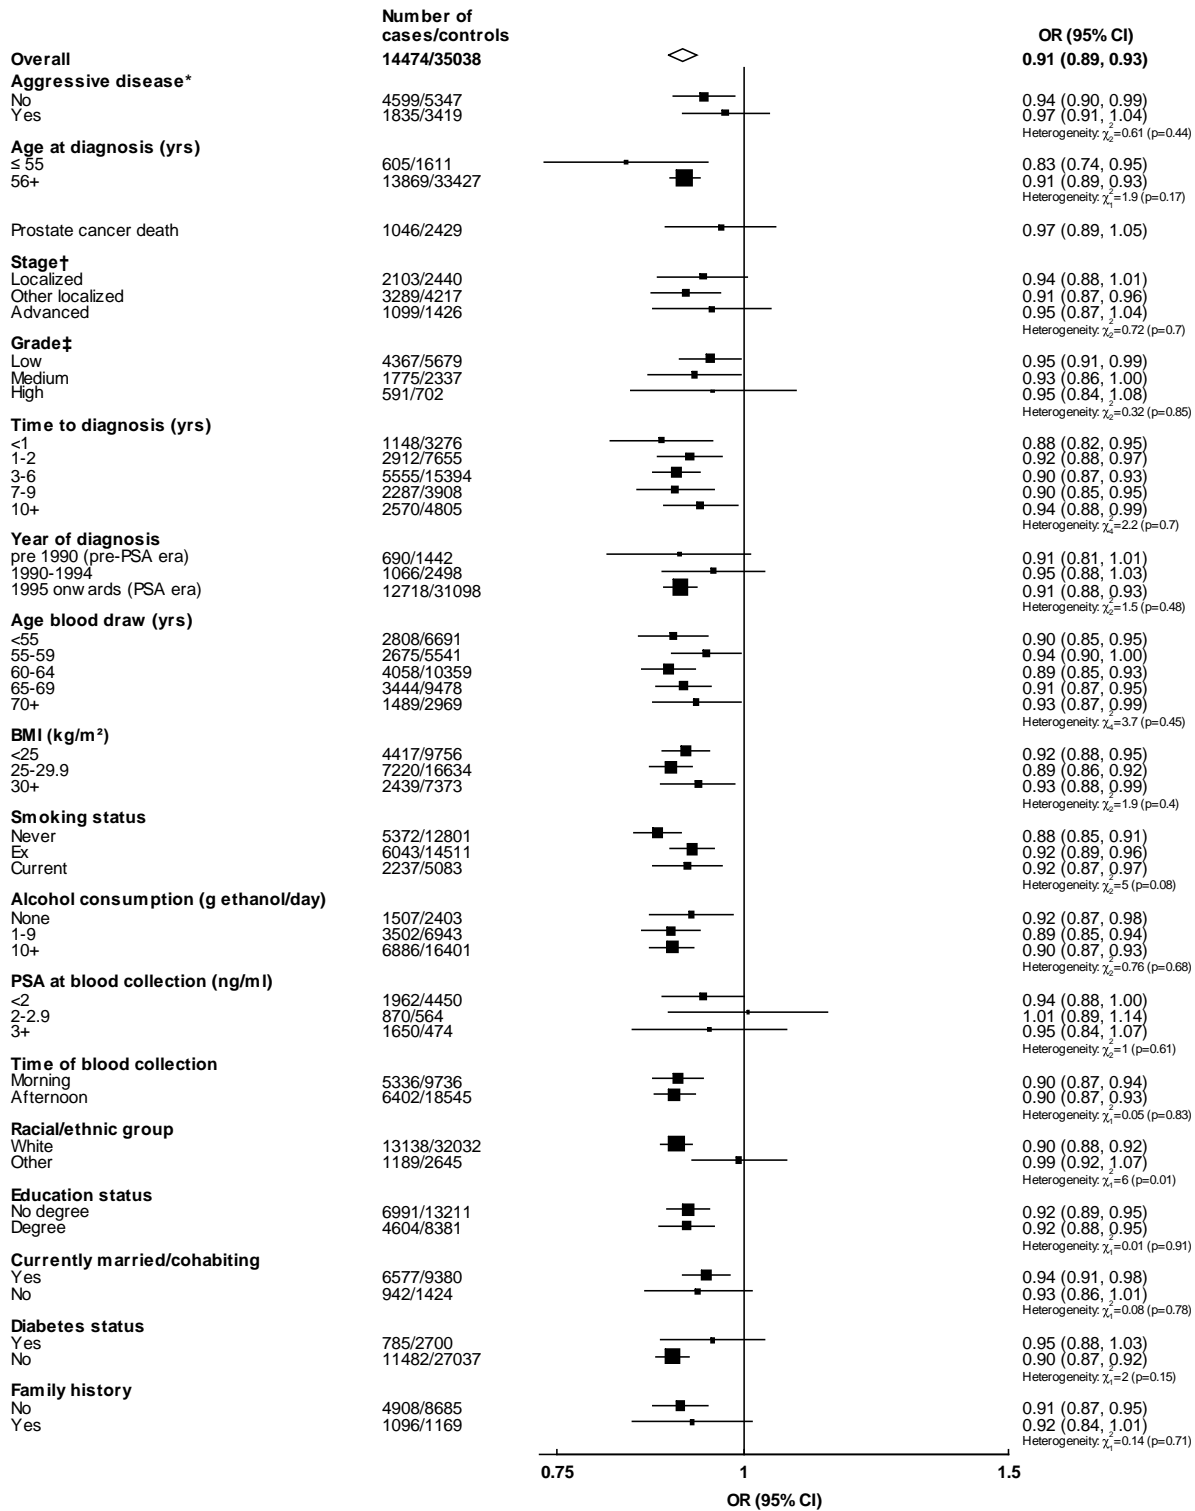

**Supplementary Figure 4:** Odds ratio (95% CIs) for overall prostate cancer per study-specific 1 SD increment of SHBG concentration by subgroup

Estimates are from logistic regression conditioned on the matching variables and adjusted for age, BMI, height, alcohol intake, smoking status, marital status, education status, racial/ethnic group, and diabetes status. The position of each square indicates the magnitude of the OR, and the area of the square is proportional to the inverse of the variance of the logarithm of the OR. The length of the horizontal line through the square indicates the 95% confidence interval. Tests for heterogeneity for case-defined factors were obtained by fitting separate models for each subgroup and assuming independence of the ORs using a method analogous to a meta-analysis. Tests for heterogeneity for non-case-defined factors were assessed with a  $\chi^2$  test of interaction between subgroup and the binary variable

\*Aggressive cancer defined as Gleason grade 8+, or prostate cancer death, or metastases or PSA >100 ng/mL

†Localized defined as TNM stage <T2 with no reported lymph node involvement or metastases or stage I; other localized stage if TNM stage T2 with no reported lymph node involvement or metastases, stage II, or equivalent; advanced stage if they were TNM stage T3 or T4 and/or N1+ and/or M1, stage III–IV, or equivalent.

‡ Low grade defined as Gleason score was <7 or equivalent (i.e. extent of differentiation good, moderate); medium grade if Gleason score was 7 (i.e. poorly differentiated); high grade if the Gleason score was  $\geq 8$  or equivalent (i.e. undifferentiated).

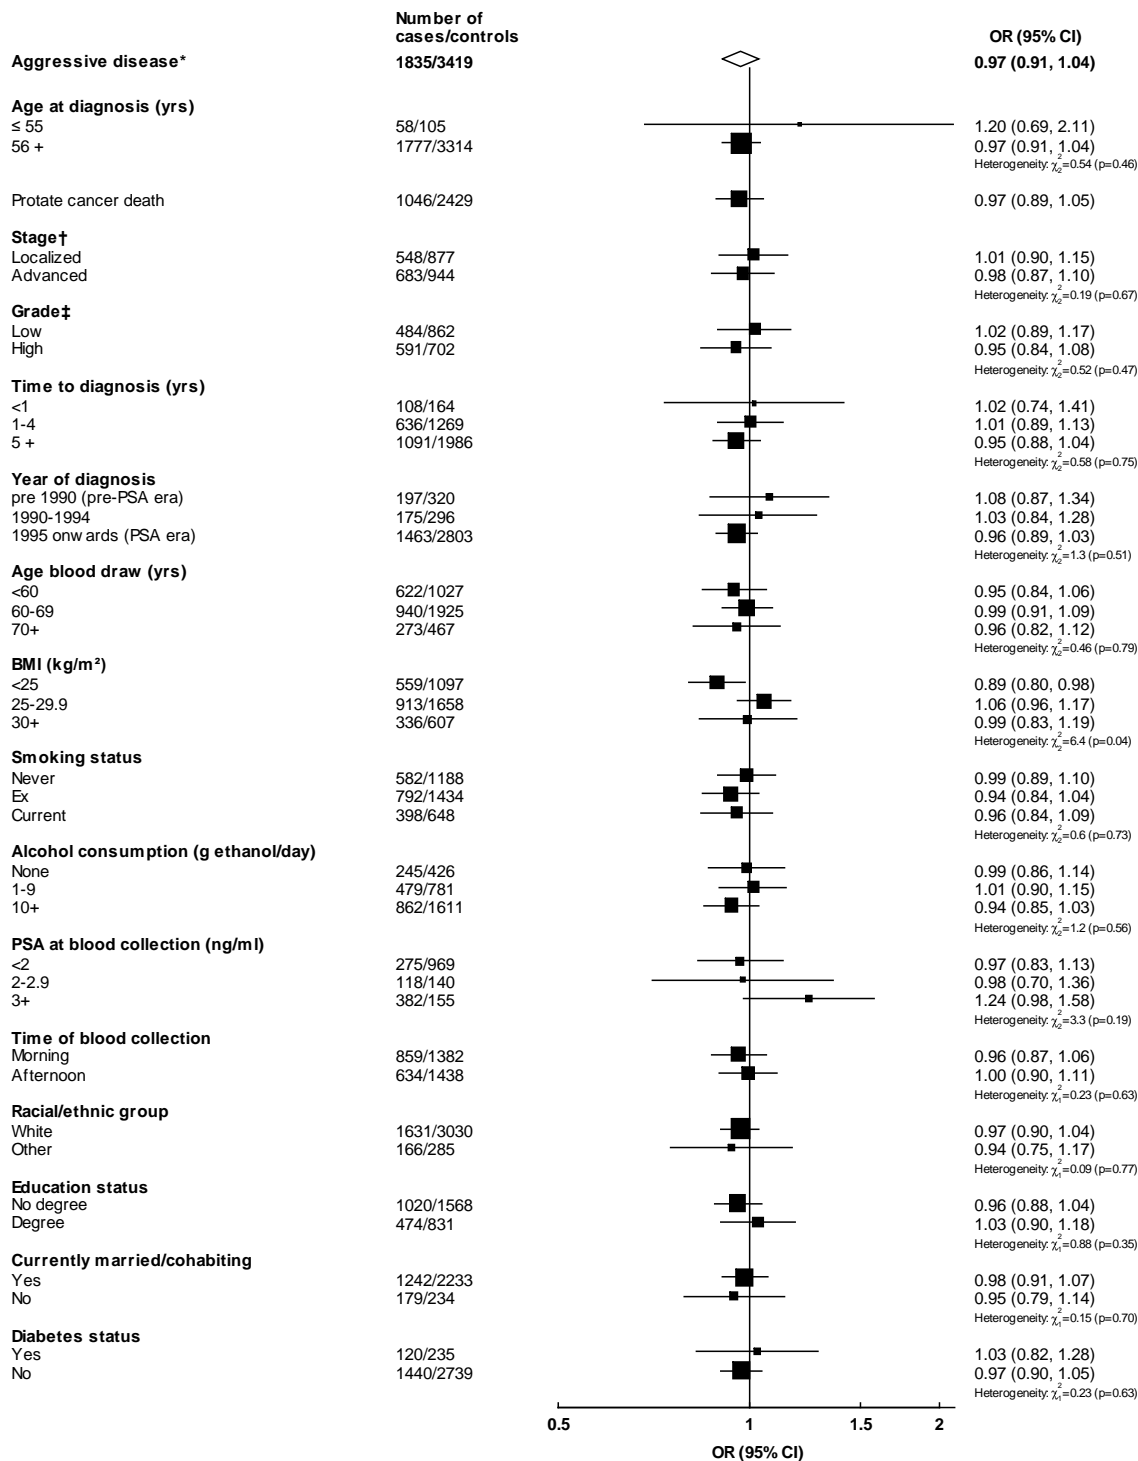

**Supplementary Figure 5:** Odds ratio (95% CIs) for aggressive\* prostate cancer per study-specific 1 SD increment of SHBG concentration by subgroup

Estimates are from logistic regression conditioned on the matching variables and adjusted for age, BMI, height, alcohol intake, smoking status, marital status, education status, racial/ethnic group, and diabetes status. The position of each square indicates the magnitude of the OR, and the area of the square is proportional to the inverse of the variance of the logarithm of the OR. The length of the horizontal line through the square indicates the 95% CI. Tests for heterogeneity for case-defined factors were obtained by fitting separate models for each subgroup and assuming independence of the ORs using a method analogous to a meta-analysis. Tests for heterogeneity for non-case-defined factors were assessed with a  $\chi^2$  test of interaction between subgroup and the binary variable

\*Aggressive cancer defined as Gleason grade 8+, or prostate cancer death, or metastases or PSA >100 ng/mL

†Localized defined as TNM stage <T2 with no reported lymph node involvement or metastases or stage I, or TNM stage T2 with no reported lymph node involvement or metastases, stage II, or equivalent; advanced stage if they were TNM stage T3 or T4 and/or N1+ and/or M1, stage III–IV, or equivalent. Men with localized aggressive disease will have had high-grade prostate cancer, PSA > 100 ng/mL or died from prostate cancer.

‡ Low grade defined as Gleason score was <8 or equivalent (i.e., extent of differentiation good, moderate, poor); high grade if the Gleason score was  $\geq 8$  or equivalent (i.e., undifferentiated). Men with low-grade aggressive disease will have had advanced prostate cancer, PSA > 100 ng/mL or died from prostate cancer.

Abbreviations: BMI=body mass index; CI=confidence interval; OR=odds ratio; PSA=prostate-specific antigen; SD=standard deviation; SHBG=sex hormone-binding globulin; TNM= tumour, node, metastasis



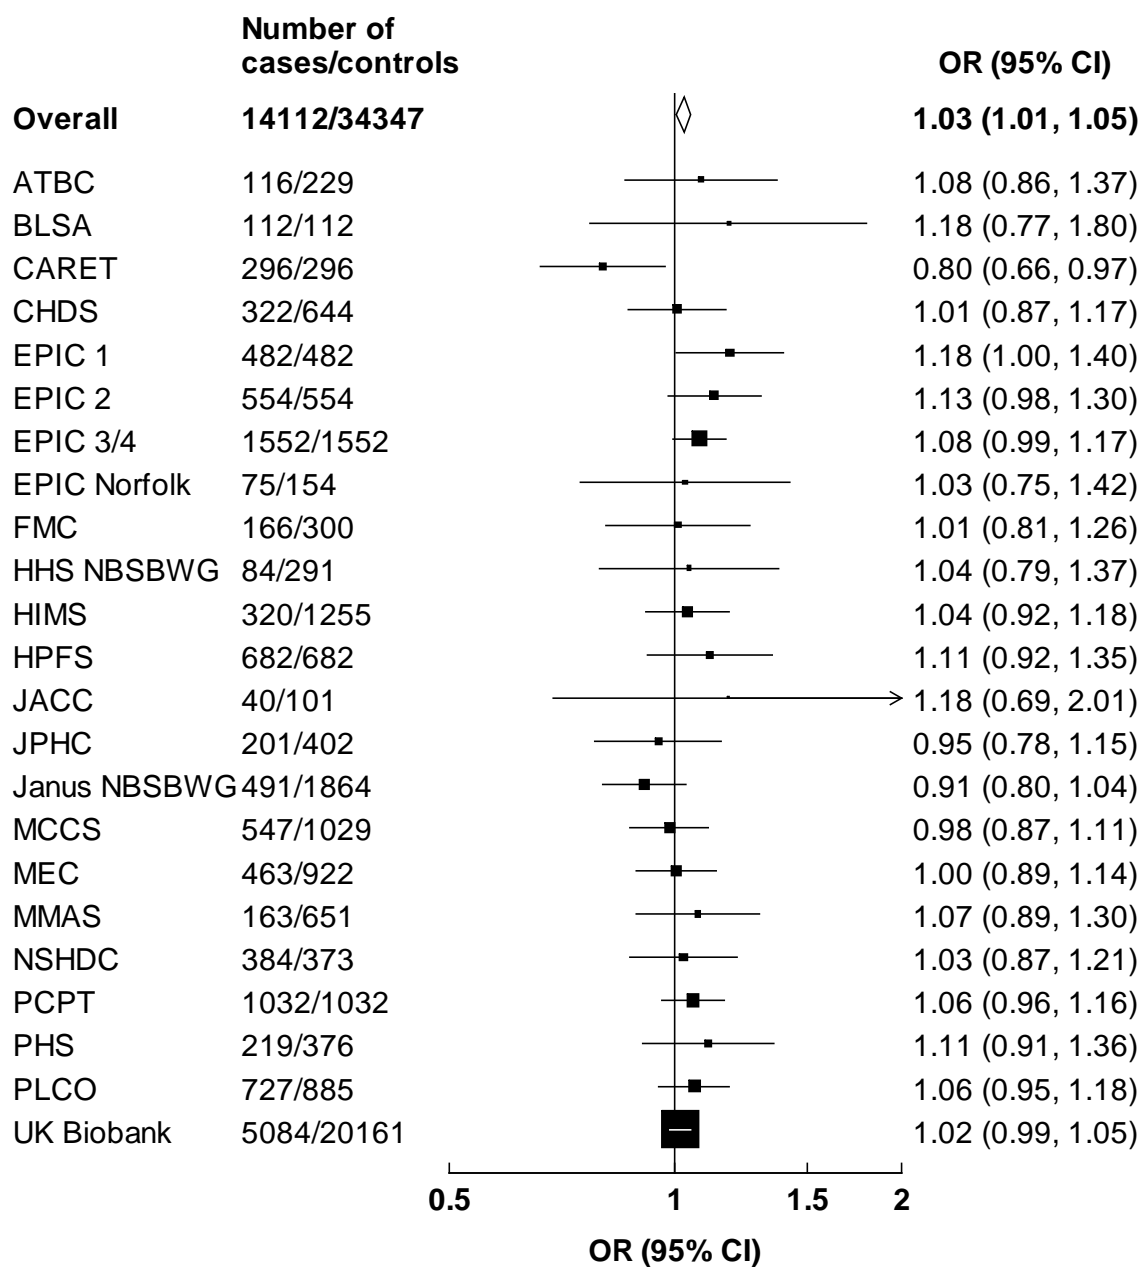

**Supplementary Figure 6:** Odds ratios (95% confidence intervals) for overall prostate cancer associated with a 1 SD increment in free testosterone by study

Estimates are from logistic regression conditioned on the matching variables and adjusted for age, BMI, height, alcohol intake, smoking status, marital status, education status, racial/ethnic group, and diabetes status. Heterogeneity in linear trends between studies was tested by comparing the  $\chi^2$  values for models with and without a (studies)  $\times$  (linear trend) interaction term.

Test of significance (overall):  $p=0.01$ .

Test of heterogeneity (overall):  $\chi^2_{22}=24$ ;  $p=0.35$ .

Test of significance (studies without organised screening):  $p=0.03$ .

Test of heterogeneity between studies without organised screening:  $\chi^2_{20}=23$ ;  $p=0.29$ .

Test of significance (studies with organised screening):  $p=0.09$ .

Test of heterogeneity between studies with organised screening:  $\chi^2_1=0.02$ ;  $p=0.88$ .

Test of heterogeneity between studies with and without organised screening:  $\chi^2_1=0.80$ ;  $p=0.37$ .

Abbreviations: ATBC=The Alpha-Tocopherol, Beta-Carotene Cancer Prevention Study; BLSA= The Baltimore Longitudinal Study of Aging; CARET =The Carotene and Retinol Efficacy Trial; CHDS=Child Health and Development Studies; CI=confidence interval; EPIC=European Prospective Investigation into Cancer and Nutrition; FMC=Finnish Mobile Clinic Health Examination Survey; HHS= Helsinki Heart Study; HIMS=Health In Men Study; HPFS= Health Professionals Follow-up Study; JACC=Japan Collaborative Cohort Study; JPHC= Japan Public Health Center-based Prospective Study; MCCS=Melbourne Collaborative Cohort Study; MEC= Multiethnic Cohort Study of Diet and Cancer; MMAS=Massachusetts Male Aging Study; NBSBWG=Nordic Biological Specimen Biobank Working Group; NSHDC=Northern Sweden Health and Disease Cohort; OR=odds ratio; PCPT= Prostate Cancer Prevention Trial; PHS=Physicians' Health Study; PLCO= Prostate, Lung, Colorectal and Ovarian Cancer Screening Trial; SD=standard deviation.

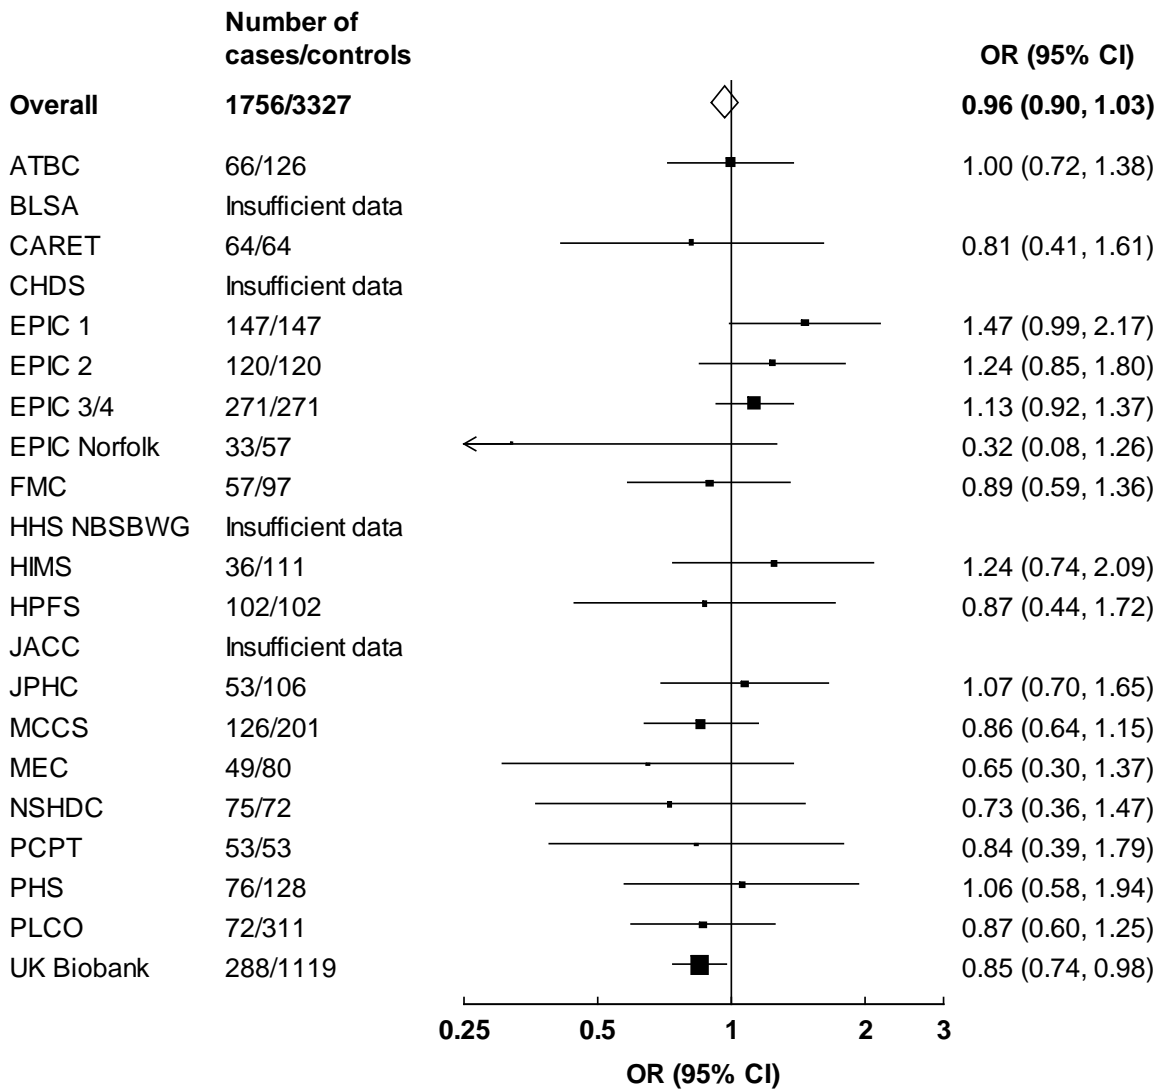

**Supplementary Figure 7:** Odds ratios (95% confidence intervals) for aggressive\* prostate cancer associated with a 1 SD increment in free testosterone by study

Estimates are from logistic regression conditioned on the matching variables and adjusted for age, BMI, height, alcohol intake, smoking status, marital status, education status, racial/ethnic group, and diabetes status. Heterogeneity in linear trends between studies was tested by comparing the  $\chi^2$  values for models with and without a (studies)  $\times$  (linear trend) interaction term.

- Test of significance (overall):  $p=0.29$ .
- Test of heterogeneity (overall):  $\chi^2_{20}=35$ ;  $p=0.02$ .
- Test of significance (studies without organised screening):  $p = 0.47$ .
- Test of heterogeneity between studies without organised screening:  $\chi^2_{18} = 35$ ;  $p = 0.01$ .
- Test of significance (studies with organised screening):  $p = 0.25$ .
- Test of heterogeneity between studies with organised screening:  $\chi^2_1 = 0.38$ ;  $p = 0.54$ .
- Test of heterogeneity between studies with and without organised screening:  $\chi^2_1 = 0.54$ ;  $p = 0.46$ .

\*Aggressive cancer defined as Gleason grade 8+, or prostate cancer death, or metastases or PSA >100 ng/mL.

Abbreviations: ATBC=The Alpha-Tocopherol, Beta-Carotene Cancer Prevention Study; BLSA= The Baltimore Longitudinal Study of Aging; CARET =The Carotene and Retinol Efficacy Trial; CHDS=Child Health and Development Studies; CI=confidence interval; EPIC=European Prospective Investigation into Cancer and Nutrition; FMC=Finnish Mobile Clinic Health Examination Survey; HHS= Helsinki Heart Study; HIMS=Health In Men Study; HPFS= Health Professionals Follow-up Study; JACC=Japan Collaborative Cohort Study; JPHC= Japan Public Health Center-based Prospective Study; MCCS=Melbourne Collaborative Cohort Study; MEC= Multiethnic Cohort Study of Diet and Cancer; NBSBWG=Nordic Biological Specimen Biobank Working Group; NSHDC=Northern Sweden Health and Disease Cohort; OR=odds ratio; PCPT= Prostate Cancer Prevention Trial; PHS=Physicians' Health Study; PLCO= Prostate, Lung, Colorectal and Ovarian Cancer Screening Trial; SD=standard deviation.

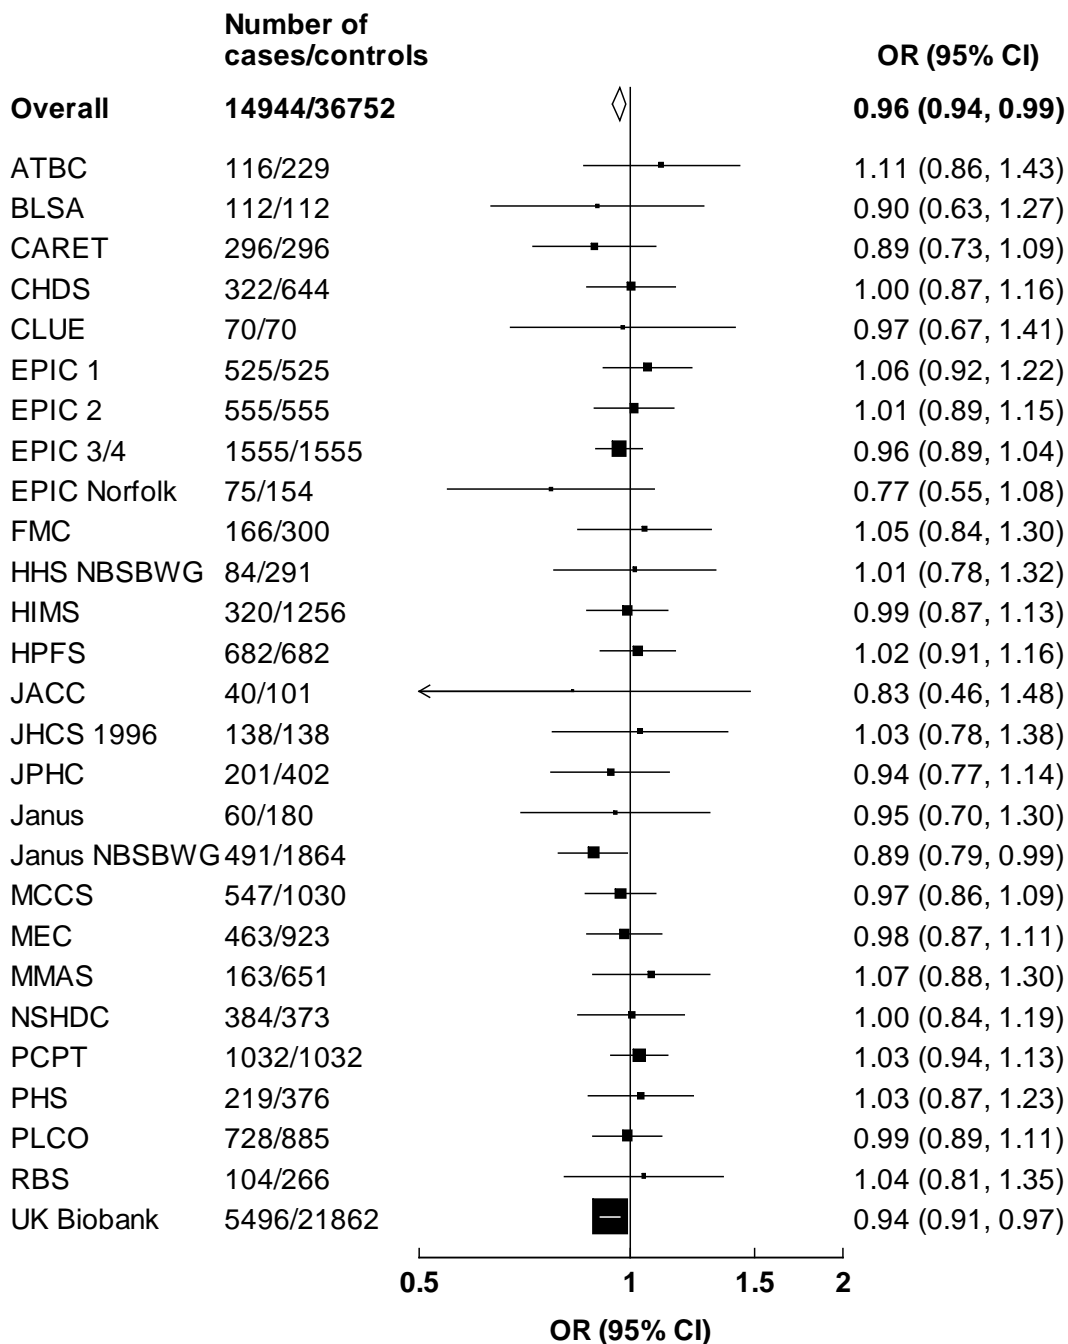

**Supplementary Figure 8:** Odds ratios (95% confidence intervals) for prostate cancer associated with a 1 SD increment in total testosterone by study

Estimates are from logistic regression conditioned on the matching variables and adjusted for age, BMI, height, alcohol intake, smoking status, marital status, education status, racial/ethnic group, and diabetes status. Heterogeneity in linear trends between studies was tested by comparing the  $\chi^2$  values for models with and without a (studies)  $\times$  (linear trend) interaction term.

Test of significance (overall):  $p=0.09$ .

Test of heterogeneity (overall):  $\chi^2_{22}=24$ ;  $p=0.35$ .

Test of significance (studies without organised screening):  $p=0.13$ .

Test of heterogeneity between studies without organised screening:  $\chi^2_{20}=24$ ;  $p=0.25$ .

Test of significance (studies with organised screening):  $p=0.61$ .

Test of heterogeneity between studies with organised screening:  $\chi^2_1=0.16$ ;  $p=0.68$ .

Test of heterogeneity between studies with and without organised screening:  $\chi^2_1=0.05$ ;  $p=0.82$ .

Abbreviations: ATBC=The Alpha-Tocopherol, Beta-Carotene Cancer Prevention Study; BLSA= The Baltimore Longitudinal Study of Aging; CARET=The Carotene and Retinol Efficacy Trial; CHDS=Child Health and Development Studies; CI=confidence interval; CLUE=Give Us a Clue to Cancer and Heart Disease; EPIC=European Prospective Investigation into Cancer and Nutrition; FMC=Finnish Mobile Clinic Health Examination Survey; HHS= Helsinki Heart Study; HIMS=Health In Men Study; HPFS= Health Professionals Follow-up Study; JACC=Japan Collaborative Cohort Study; JPHC= Japan Public Health Center-based Prospective Study; JHCS= Japan-Hawaii Cancer Study; MCCS=Melbourne Collaborative Cohort Study; MEC=Multiethnic Cohort Study of Diet and Cancer; MMAS=Massachusetts Male Aging Study; NBSBWG=Nordic Biological Specimen Biobank Working Group; NSHDC=Northern Sweden Health and Disease Cohort; OR=odds ratio; PCPT= Prostate Cancer Prevention Trial; PHS=Physicians' Health Study; PLCO= Prostate, Lung, Colorectal and Ovarian Cancer Screening Trial; RBS=Rancho Bernardo Study; SD=standard deviation.

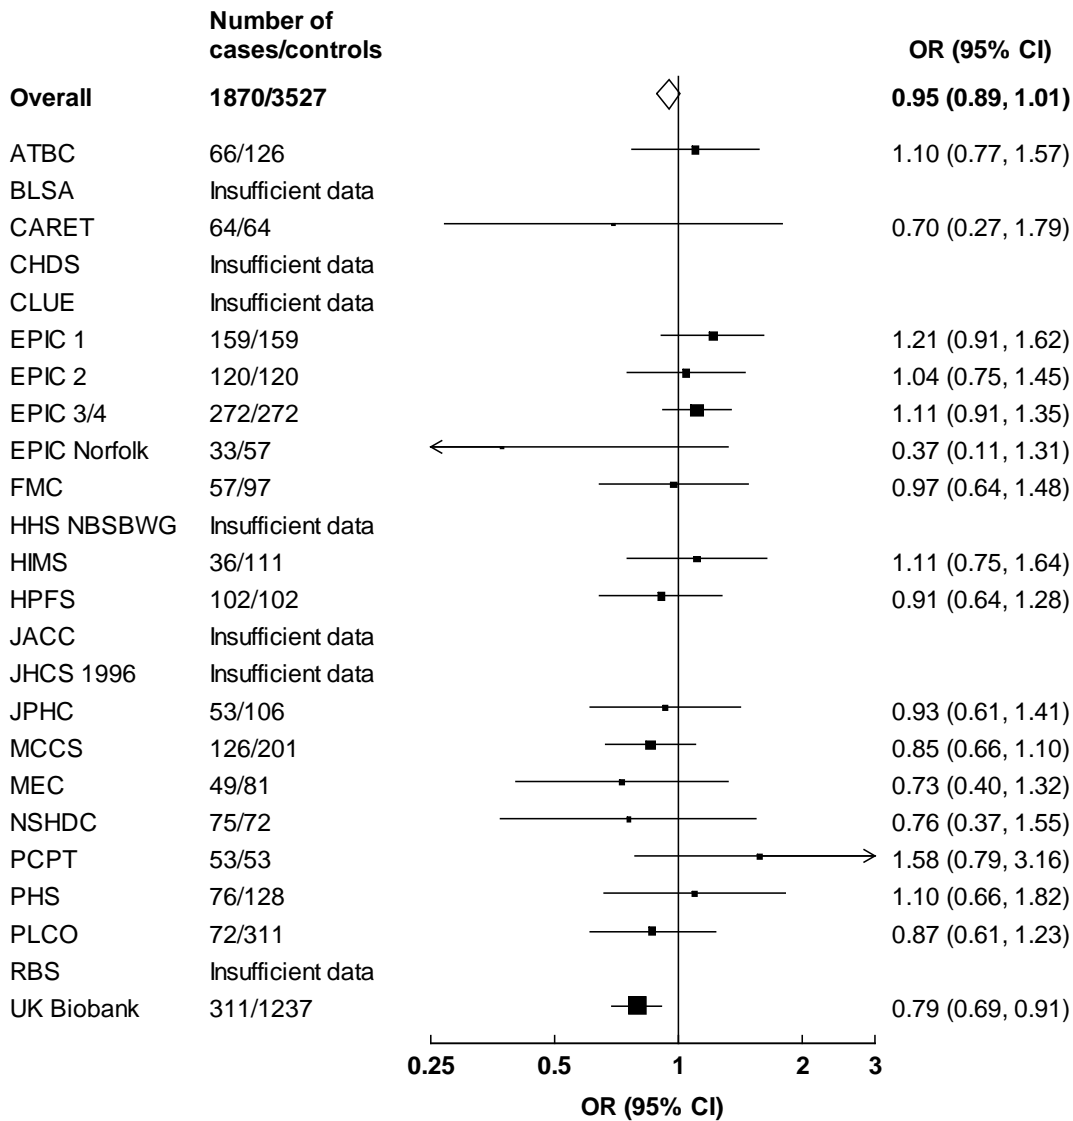

**Supplementary Figure 9:** Odds ratios (95% confidence intervals) for aggressive\* prostate cancer associated with a 1 SD increment in total testosterone by study

Estimates are from logistic regression conditioned on the matching variables and adjusted for age, BMI, height, alcohol intake, smoking status, marital status, education status, racial/ethnic group, and diabetes status. Heterogeneity in linear trends between studies was tested by comparing the  $\chi^2$  values for models with and without a (studies)  $\times$  (linear trend) interaction term.

Test of significance (overall):  $p = 0.09$ .

Test of heterogeneity (overall):  $\chi^2_{23} = 22$ ;  $p = 0.52$ .

Test of significance (studies without organised screening):  $p = 0.12$ .

Test of heterogeneity between studies without organised screening:  $\chi^2_{21} = 22$ ;  $p = 0.40$ .

Test of significance (studies with organised screening):  $p = 0.61$ .

Test of heterogeneity between studies with organised screening:  $\chi^2_1 = 0.2$ ;  $p = 0.69$ .

Test of heterogeneity between studies with and without organised screening:  $\chi^2_1 = 0.04$ ;  $p = 0.85$ .

\*Aggressive cancer defined as Gleason grade 8+, or prostate cancer death, or metastases or PSA >100 ng/mL.

Abbreviations: ATBC=The Alpha-Tocopherol, Beta-Carotene Cancer Prevention Study; BLSA=The Baltimore Longitudinal Study of Aging; CARET=The Carotene and Retinol Efficacy Trial; CHDS=Child Health and Development Studies; CI=confidence interval; CLUE=Give Us a Clue to Cancer and Heart Disease; EPIC=European Prospective Investigation into Cancer and Nutrition; FMC=Finnish Mobile Clinic Health Examination Survey; HHS= Helsinki Heart Study; HIMS=Health In Men Study; HPFS= Health Professionals Follow-up Study; JACC=Japan Collaborative Cohort Study; JPHC= Japan Public Health Center-based Prospective Study; JHCS= Japan-Hawaii Cancer Study; MCCS=Melbourne Collaborative Cohort Study; MEC=Multiethnic Cohort Study of Diet and Cancer; NBSBWG=Nordic Biological Specimen Biobank Working Group; NSHDC=Northern Sweden Health and Disease Cohort; OR=odds ratio; PCPT= Prostate Cancer Prevention Trial; PHS=Physicians' Health Study; PLCO= Prostate, Lung, Colorectal and Ovarian Cancer Screening Trial; SD=standard deviation.

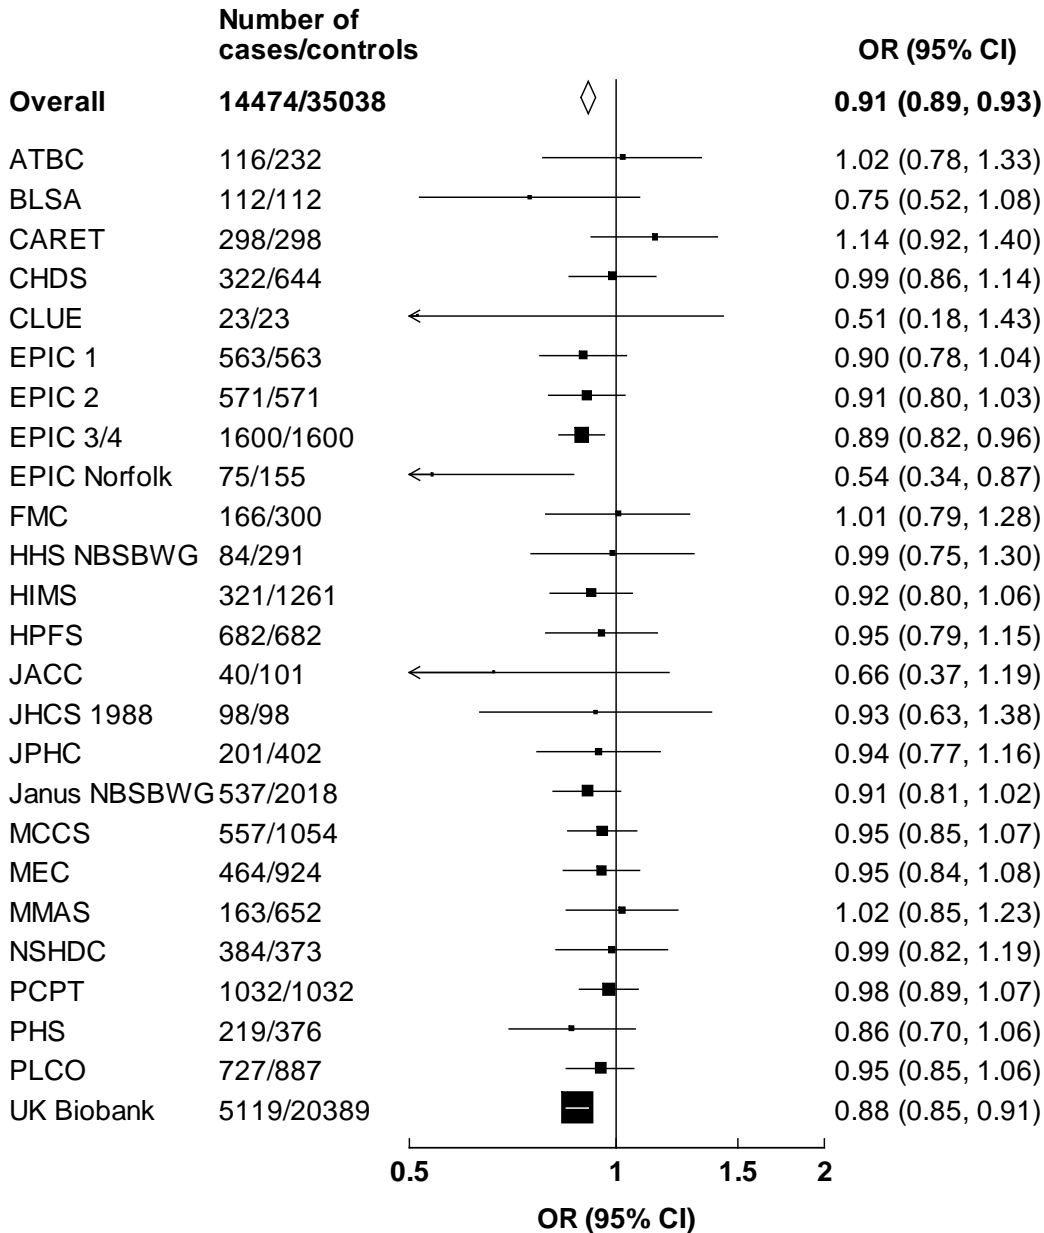

**Supplementary Figure 10:** Odds ratios (95% confidence intervals) for prostate cancer associated with a 1 SD increment in sex hormone-binding globulin by study

Estimates are from logistic regression conditioned on the matching variables and adjusted for age, BMI, height, alcohol intake, smoking status, marital status, education status, racial/ethnic group, and diabetes status. Heterogeneity in linear trends between studies was tested by comparing the  $\chi^2$  values for models with and without a (studies)  $\times$  (linear trend) interaction term.

Test of significance (overall):  $p < 0.0001$ .

Test of heterogeneity (overall):  $\chi^2_{24} = 17$ ;  $p = 0.83$ .

Test of significance (studies without organised screening):  $p < 0.0001$ .

Test of heterogeneity between studies without organised screening:  $\chi^2_{22} = 13$ ;  $p = 0.92$ .

Test of significance (studies with organised screening):  $p = 0.31$ .

Test of heterogeneity between studies with organised screening:  $\chi^2_1 = 0.37$ ;  $p = 0.54$ .

Test of heterogeneity between studies with and without organised screening:  $\chi^2_1 = 3.4$ ;  $p = 0.07$ .

Abbreviations: ATBC=The Alpha-Tocopherol, Beta-Carotene Cancer Prevention Study; BLSA=The Baltimore Longitudinal Study of Aging; CARET=The Carotene and Retinol Efficacy Trial; CHDS=Child Health and Development Studies; CI=confidence interval; CLUE=Give Us a Clue to Cancer and Heart Disease; EPIC=European Prospective Investigation into Cancer and Nutrition; FMC=Finnish Mobile Clinic Health Examination Survey; HHS= Helsinki Heart Study; HIMS=Health In Men Study; HPFS= Health Professionals Follow-up Study; JACC=Japan Collaborative Cohort Study; JPHC= Japan Public Health Center-based Prospective Study; JHCS= Japan-Hawaii Cancer Study; MCCS=Melbourne Collaborative Cohort Study; MEC=Multiethnic Cohort Study of Diet and Cancer; MMAS=Massachusetts Male Aging Study; NBSBWG=Nordic Biological Specimen Biobank Working Group; NSHDC=Northern Sweden Health and Disease Cohort; OR=odds ratio; PCPT= Prostate Cancer Prevention Trial; PHS=Physicians' Health Study; PLCO= Prostate, Lung, Colorectal and Ovarian Cancer Screening Trial; SD=standard deviation.

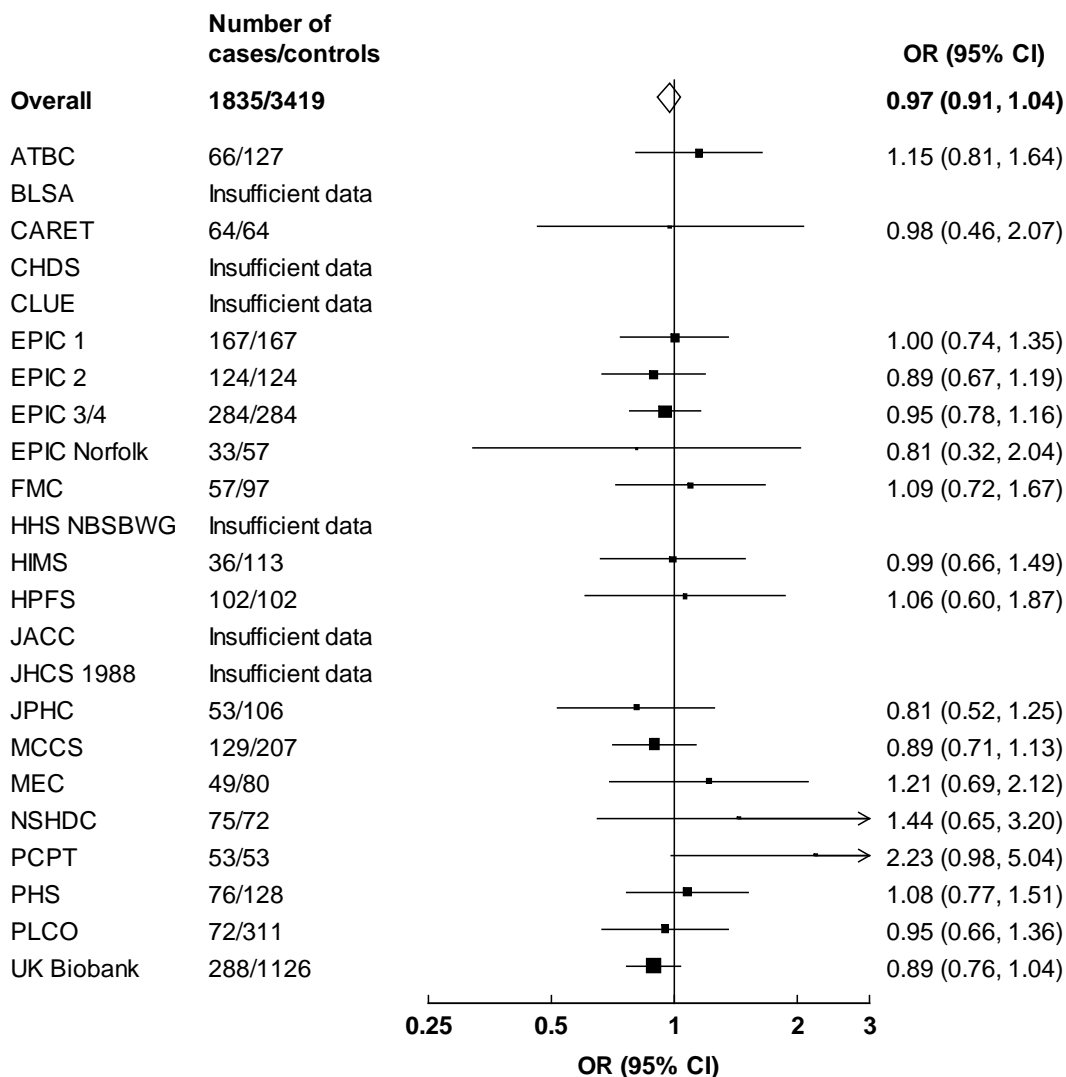

**Supplementary Figure 11:** Odds ratios (95% confidence intervals) for aggressive\* prostate cancer associated with a 1 SD increment in sex hormone-binding globulin by study

Estimates are from logistic regression conditioned on the matching variables and adjusted for age, BMI, height, alcohol intake, smoking status, marital status, education status, racial/ethnic group, and diabetes status. Heterogeneity in linear trends between studies was tested by comparing the  $\chi^2$  values for models with and without a (studies)  $\times$  (linear trend) interaction term.

Test of significance (overall):  $p = 0.40$ .

Test of heterogeneity (overall):  $\chi^2_{22} = 17$ ;  $p = 0.79$ .

Test of significance (studies without organised screening):  $p = 0.29$ .

Test of heterogeneity between studies without organised screening:  $\chi^2_{20} = 18$ ;  $p = 0.62$ .

Test of significance (studies with organised screening):  $p = 0.30$ .

Test of heterogeneity between studies with organised screening:  $\chi^2_1 = 1.1$ ;  $p = 0.30$ .

Test of heterogeneity between studies with and without organised screening:  $\chi^2_1 = 0.5$ ;  $p = 0.49$ .

\*Aggressive cancer defined as Gleason grade 8+, or prostate cancer death, or metastases or PSA >100 ng/mL.

Abbreviations: ATBC=The Alpha-Tocopherol, Beta-Carotene Cancer Prevention Study; BLSA=The Baltimore Longitudinal Study of Aging; CARET=The Carotene and Retinol Efficacy Trial; CHDS=Child Health and Development Studies; CI=confidence interval; CLUE=Give Us a Clue to Cancer and Heart Disease; EPIC=European Prospective Investigation into Cancer and Nutrition; FMC=Finnish Mobile Clinic Health Examination Survey; HHS= Helsinki Heart Study; HIMS=Health In Men Study; HPFS= Health Professionals Follow-up Study; JACC=Japan Collaborative Cohort Study; JPHC= Japan Public Health Center-based Prospective Study; JHCS= Japan-Hawaii Cancer Study; MCCS=Melbourne Collaborative Cohort Study; MEC=Multiethnic Cohort Study of Diet and Cancer; NBSBWG=Nordic Biological Specimen Biobank Working Group; NSHDC=Northern Sweden Health and Disease Cohort; OR=odds ratio; PCPT= Prostate Cancer Prevention Trial; PHS=Physicians' Health Study; PLCO= Prostate, Lung, Colorectal and Ovarian Cancer Screening Trial; SD=standard deviation.

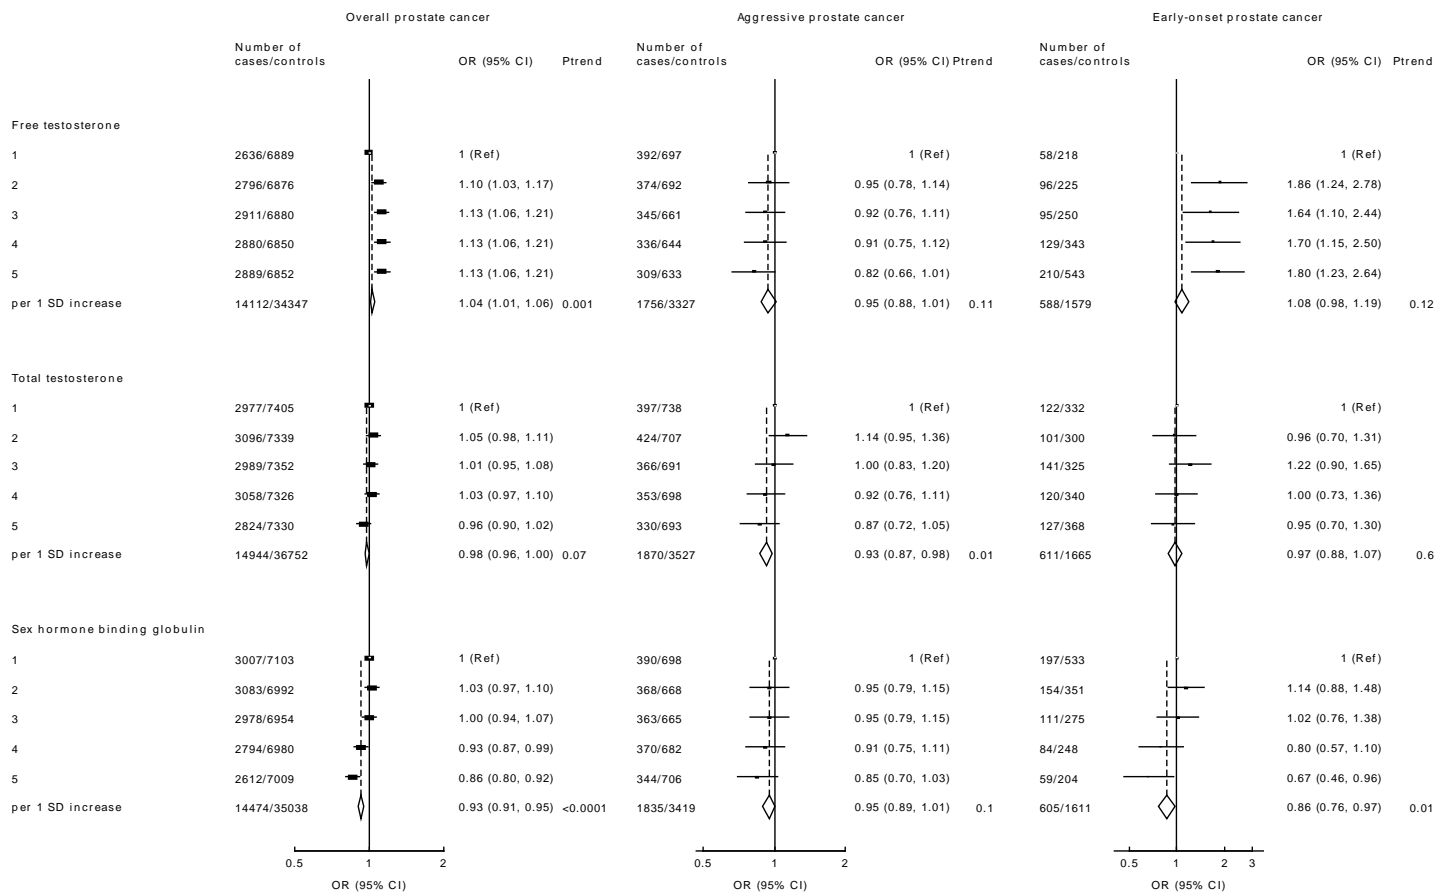

**Supplementary Figure 12:** Risks of overall, aggressive and early-onset prostate cancer\* by study-specific fifths of biomarker concentrations and 1 SD increment in the unadjusted model.

Estimates are from logistic regression conditioned on the matching variables. The position of each square indicates the magnitude of the OR, and the area of the square is proportional to the inverse of the variance of the logarithm of the OR. The length of the horizontal line through the square indicates the 95% confidence interval.

\*Aggressive cancer defined as Gleason grade 8+, or prostate cancer death, or metastases or PSA >100 ng/mL. Early-onset defined as diagnosed ≤55 years

Abbreviations: BMI=body mass index; CI=confidence interval; OR=odds ratio; PSA=prostate-specific antigen; SD=standard deviation.

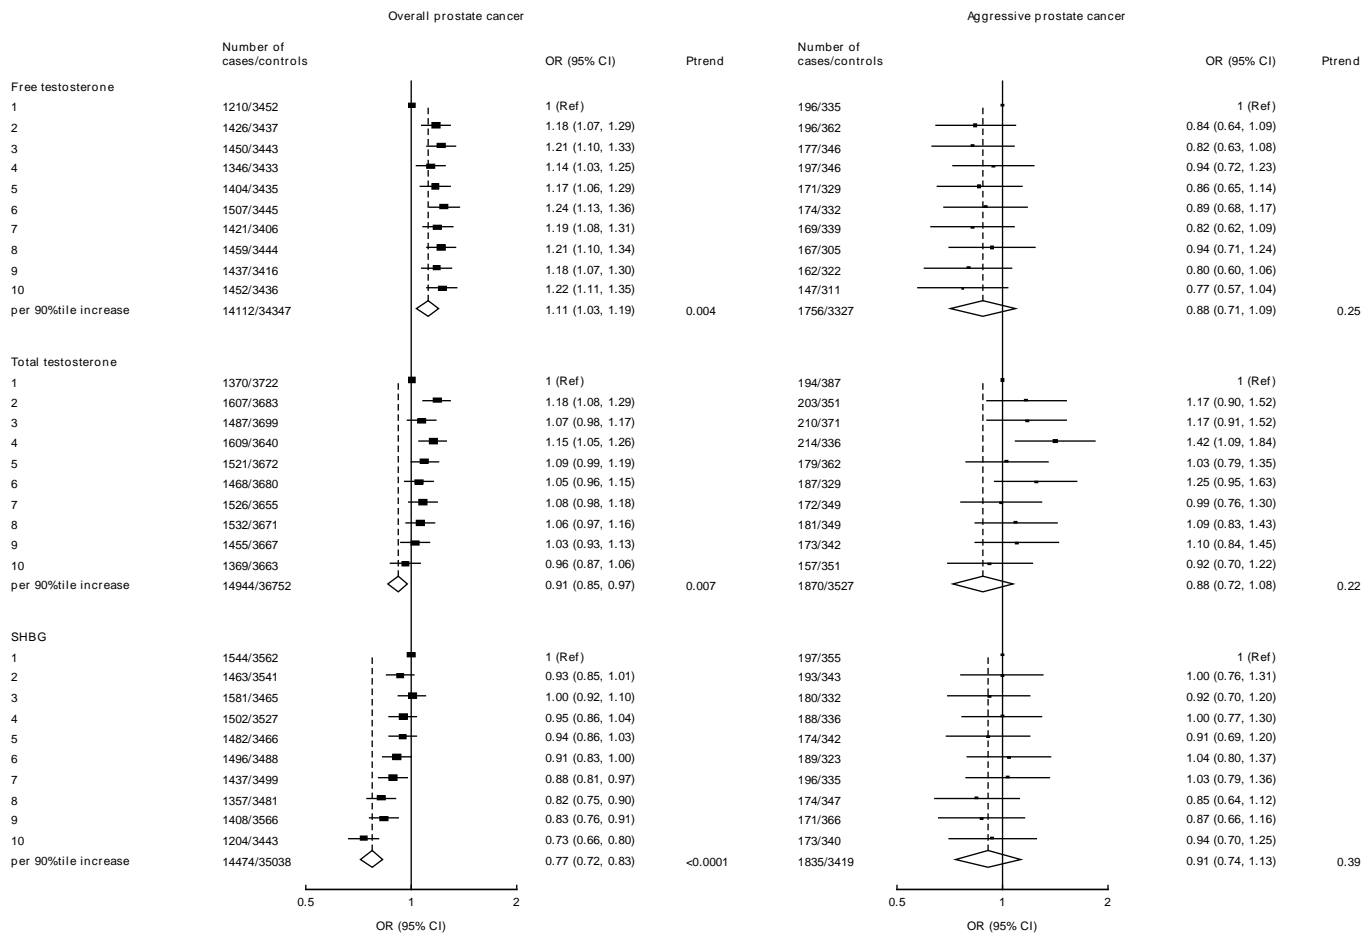

**Supplementary Figure 13:** Risks of overall and aggressive\* prostate cancer by study-specific tenths of biomarker concentrations and 90%tile increment.

Estimates are from logistic regression conditioned on the matching variables and adjusted for age, BMI, height, alcohol intake, smoking status, marital status, education status, racial/ethnic group, and diabetes status. The categorical variables representing the study-specific tenths of the biomarker concentrations was replaced with a continuous variable that was scored as 0, 0.11, 0.22, 0.33, 0.44, 0.56, 0.67, 0.78, 0.89 and 1; because the mid-points of the lowest and highest tenths are the 10<sup>th</sup> and 90<sup>th</sup> percentiles of the study-specific biomarker concentrations, a unit increase in this variable can be taken to represent an 90 percentile increase in the biomarker study-specific concentration. The position of each square indicates the magnitude of the odds ratio, and the area of the square is proportional to the inverse of the variance of the logarithm of the OR. The length of the horizontal line through the square indicates the 95% CI.

\*Aggressive cancer defined as Gleason grade 8+, or prostate cancer death, or metastases or PSA >100 ng/mL.

Abbreviations: BMI=body mass index; CI=confidence interval; OR=odds ratio; PSA=prostate specific antigen; SHBG=sex hormone-binding globulin.



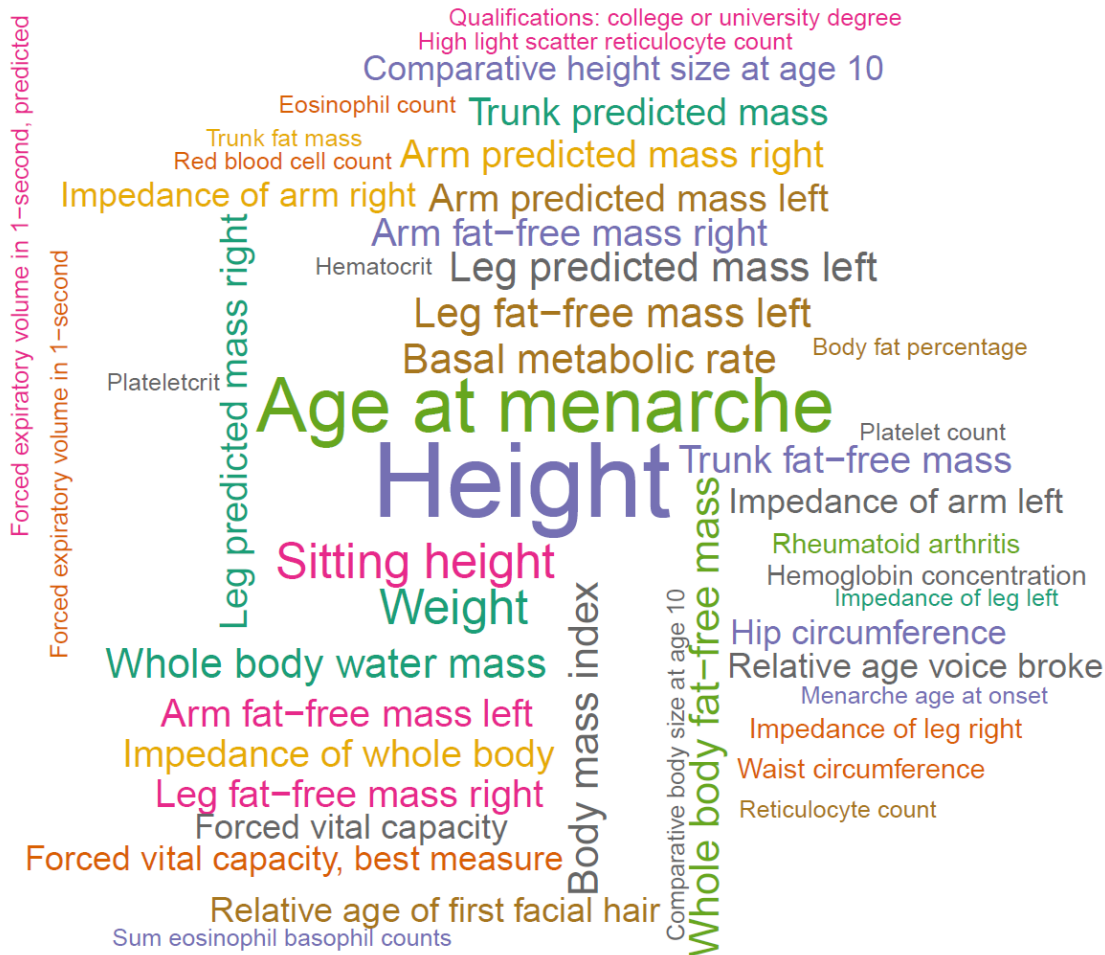

**Supplementary Figure 14:** Traits associated with each free testosterone associated SNP used in the Mendelian randomization analyses

Traits were identified using PhenoScanner resource <sup>1,2</sup>. Larger words represent a greater frequency of the traits being associated with the SNPs (P threshold= $5 \times 10^{-8}$ ). This figure was created using the wordcloud package in R.

Abbreviations: SNP=single nucleotide polymorphism.



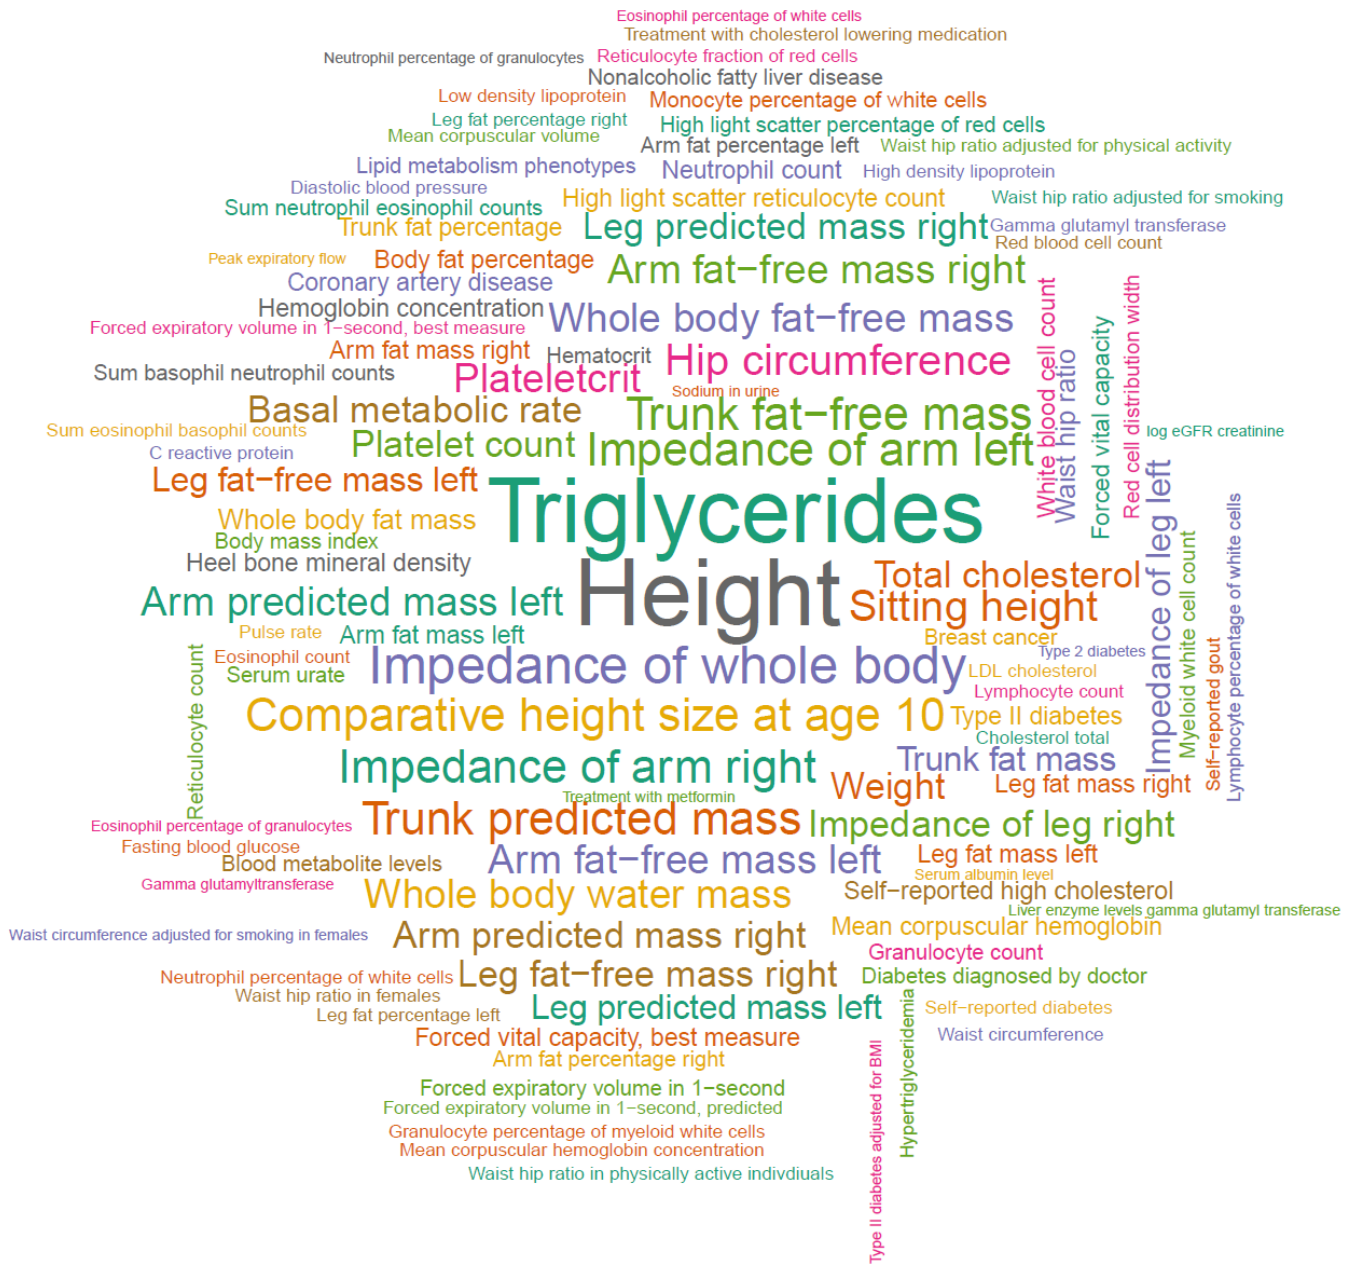

**Supplementary Figure 16:** Traits associated with each SHBG associated SNP used in the Mendelian randomization analyses

Traits were identified using PhenoScanner resource <sup>1,2</sup>. Larger words represent a greater frequency of the traits being associated with the SNPs (P threshold= $5 \times 10^{-8}$ ). This figure was created using the wordcloud package in R.

Abbreviations: Sex hormone-binding globulin; SNP=single nucleotide polymorphism.

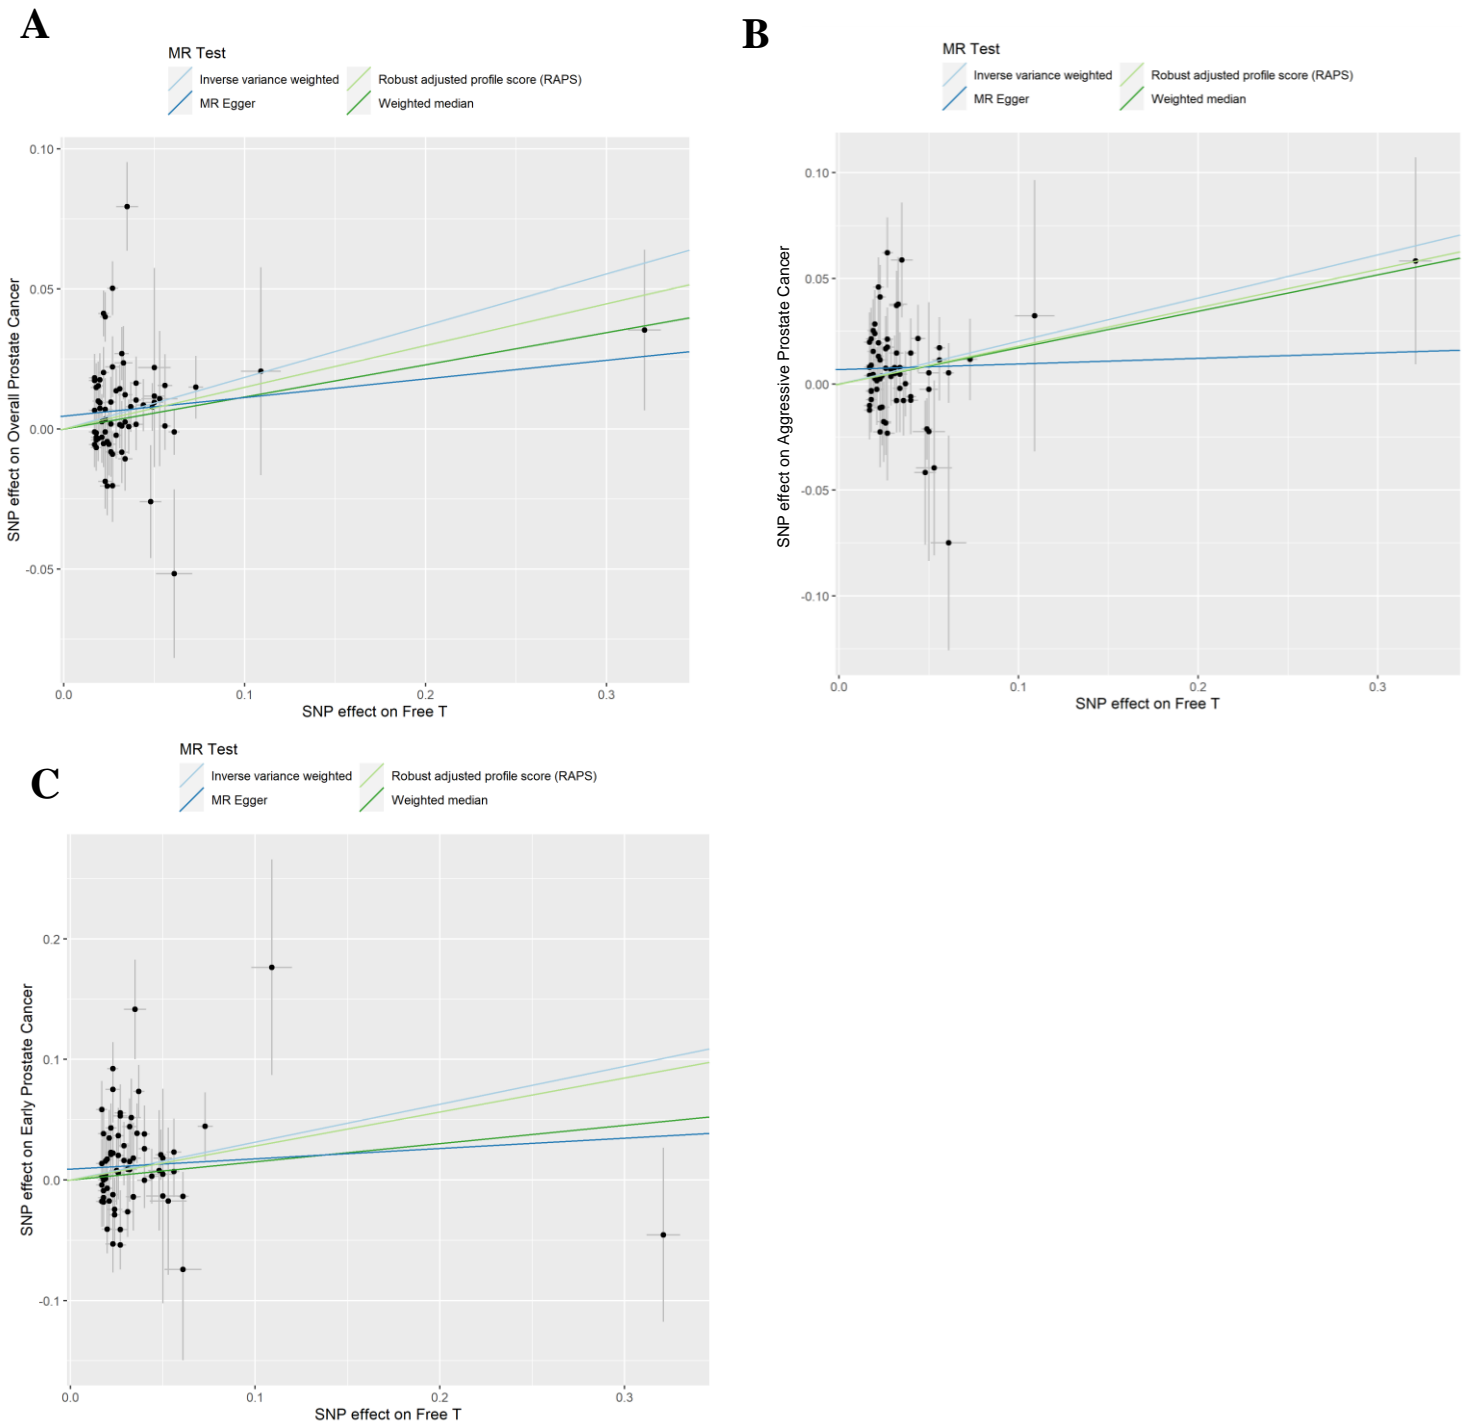

**Supplementary Figure 17: Scatterplot of genetic associations with free testosterone against genetic associations with:**

**A) Overall prostate cancer**

**B) Aggressive prostate cancer**

**C) Early-onset prostate cancer**

Aggressive cancer defined as Gleason grade 8+, or prostate cancer death, or metastases or PSA >100 ng/mL, early-onset defined as diagnosed ≤55 years. Point estimates represent log odds ratios. Error bars represent 95% confidence intervals.

Abbreviations: PSA=prostate-specific antigen; SNP=single nucleotide repeat polymorphism.

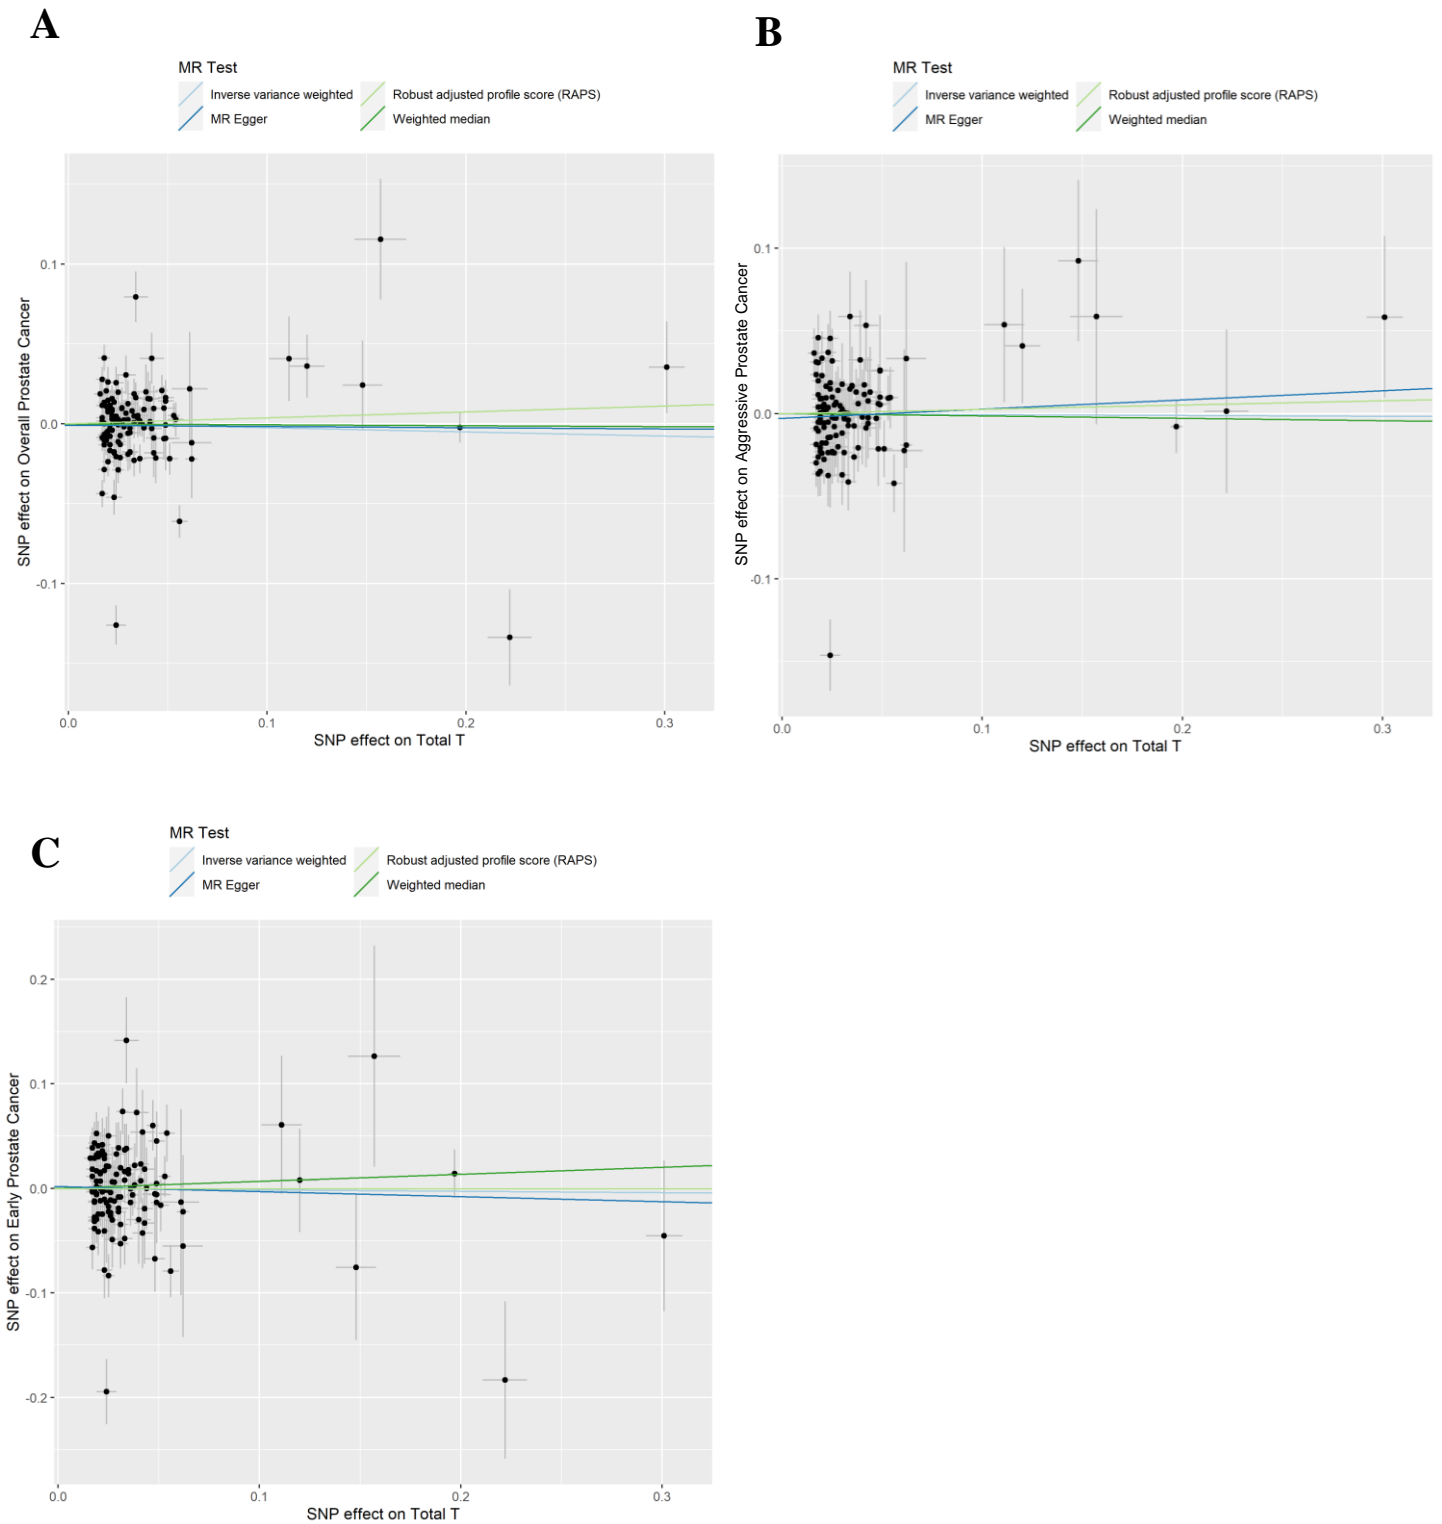

**Supplementary Figure 18: Scatterplot of genetic associations with total testosterone against genetic associations with:**

**A) Overall prostate cancer**

**B) Aggressive prostate cancer**

**C) Early-onset prostate cancer**

Aggressive cancer defined as Gleason grade 8+, or prostate cancer death, or metastases or PSA >100 ng/mL, early-onset defined as diagnosed ≤55 years. Point estimates represent log odds ratios. Error bars represent 95% confidence intervals.

Abbreviations: PSA=prostate-specific antigen; SNP=single nucleotide repeat polymorphism.

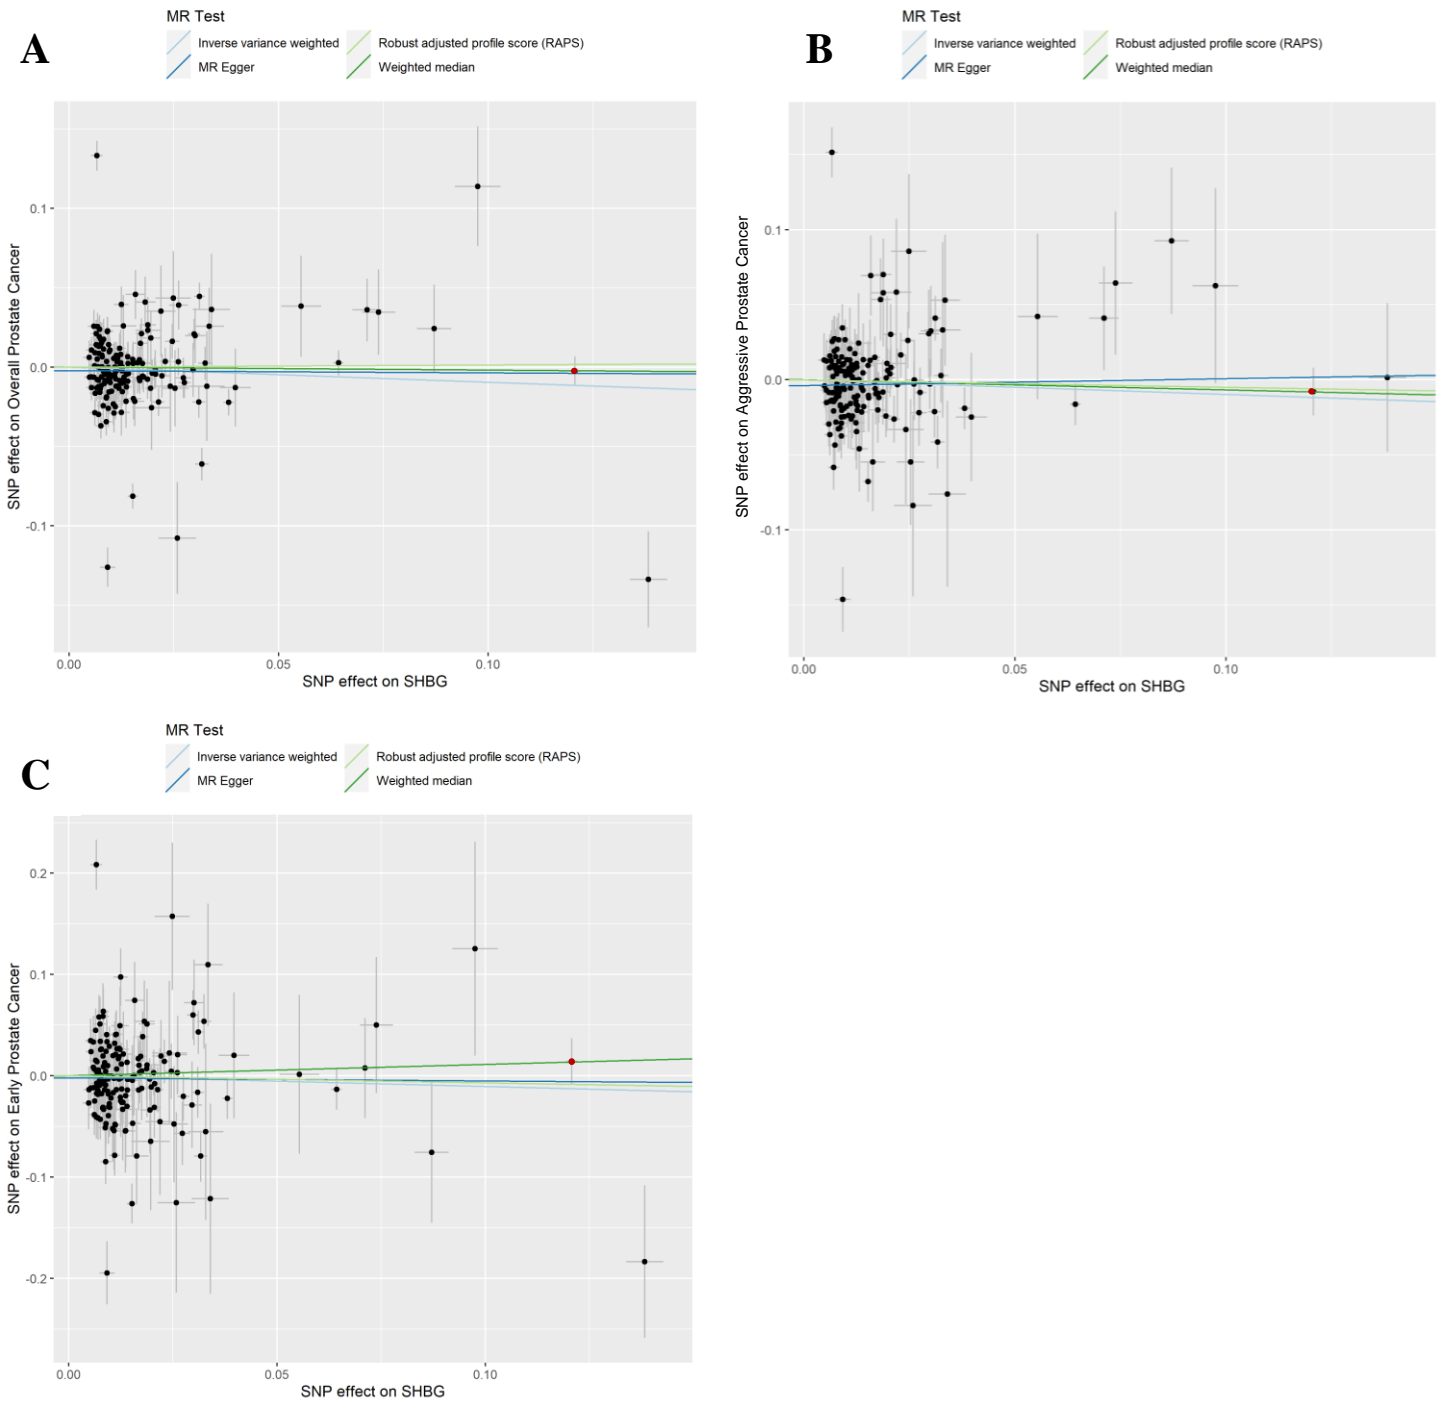

**Supplementary Figure 19: Scatterplot of genetic associations with SHBG against genetic associations with:**

**A) Overall prostate cancer**

**B) Aggressive prostate cancer**

**C) Early-onset prostate cancer**

Aggressive cancer defined as Gleason grade 8+, or prostate cancer death, or metastases or PSA >100 ng/mL, early-onset defined as diagnosed ≤55 years. Point estimates represent log odds ratios. Error bars represent 95% confidence intervals, *cis*-SNP coloured red.

Abbreviations: PSA=prostate-specific antigen; SHBG=sex hormone-binding globulin; SNP=single nucleotide repeat polymorphism.

## References

1. Kamat MA, Blackshaw JA, Young R, Surendran P, Burgess S, Danesh J, Butterworth AS, Staley JR. PhenoScanner V2: an expanded tool for searching human genotype-phenotype associations. *Bioinformatics* 2019;**35**: 4851-3.
2. Staley JR, Blackshaw J, Kamat MA, Ellis S, Surendran P, Sun BB, Paul DS, Freitag D, Burgess S, Danesh J, Young R, Butterworth AS. PhenoScanner: a database of human genotype-phenotype associations. *Bioinformatics (Oxford, England)* 2016;**32**: 3207-9.
3. Roddam AW, Allen NE, Appleby P, Key TJ. Endogenous sex hormones and prostate cancer: a collaborative analysis of 18 prospective studies. *Journal of the National Cancer Institute* 2008;**100**: 170-83.
4. Dorgan JF, Albanes D, Virtamo J, Heinonen OP, Chandler DW, Galmarini M, McShane LM, Barrett MJ, Tangrea J, Taylor PR. Relationships of serum androgens and estrogens to prostate cancer risk: results from a prospective study in Finland. *Cancer epidemiology, biomarkers & prevention : a publication of the American Association for Cancer Research, cosponsored by the American Society of Preventive Oncology* 1998;**7**: 1069-74.
5. Carter HB, Pearson JD, Metter EJ, Chan DW, Andres R, Fozard JL, Rosner W, Walsh PC. Longitudinal evaluation of serum androgen levels in men with and without prostate cancer. *Prostate* 1995;**27**: 25-31.
6. Parsons JK, Carter HB, Platz EA, Wright EJ, Landis P, Metter EJ. Serum testosterone and the risk of prostate cancer: potential implications for testosterone therapy. *Cancer epidemiology, biomarkers & prevention : a publication of the American Association for Cancer Research, cosponsored by the American Society of Preventive Oncology* 2005;**14**: 2257-60.
7. Chen C, Weiss NS, Stanczyk FZ, Lewis SK, DiTommaso D, Etzioni R, Barnett MJ, Goodman GE. Endogenous sex hormones and prostate cancer risk: a case-control study nested within the Carotene and Retinol Efficacy Trial. *Cancer Epidemiol Biomarkers Prev* 2003;**12**: 1410-6.
8. Tsai CJ, Cohn BA, Cirillo PM, Feldman D, Stanczyk FZ, Whittemore AS. Sex steroid hormones in young manhood and the risk of subsequent prostate cancer: a longitudinal study in African-Americans and Caucasians (United States). *Cancer Causes Control* 2006;**17**: 1237-44.
9. van den Berg BJ, Christianson RE, Oechli FW. The California Child Health and Development Studies of the School of Public Health, University of California at Berkeley. *Paediatr Perinat Epidemiol* 1988;**2**: 265-82.
10. Hsing AW, Comstock GW. Serological precursors of cancer: serum hormones and risk of subsequent prostate cancer. *Cancer epidemiology, biomarkers & prevention : a publication of the American Association for Cancer Research, cosponsored by the American Society of Preventive Oncology* 1993;**2**: 27-32.
11. Travis RC, Key TJ, Allen NE, Appleby PN, Roddam AW, Rinaldi S, Egevad L, Gann PH, Rohrmann S, Linseisen J, Pischon T, Boeing H, et al. Serum androgens and prostate cancer among 643 cases and 643 controls in the European Prospective Investigation into Cancer and Nutrition. *Int J Cancer* 2007;**121**: 1331-8.
12. Low Y-L, Taylor JI, Grace PB, Dowsett M, Folklerd E, Doody D, Dunning AM, Scollen S, Mulligan AA, Welch AA, Luben RN, Khaw K-T, et al. Polymorphisms in the CYP19 Gene May Affect the Positive Correlations between Serum and Urine Phytoestrogen Metabolites and Plasma Androgen Concentrations in Men. *J Nutr* 2005;**135**: 2680-6.
13. Heikkila R, Aho K, Heliovaara M, Hakama M, Marniemi J, Reunanen A, Knekt P. Serum testosterone and sex hormone-binding globulin concentrations and the risk of prostate carcinoma: a longitudinal study. *Cancer* 1999;**86**: 312-5.
14. Stattin P, Lumme S, Tenkanen L, Alfthan H, Jellum E, Hallmans G, Thoresen S, Hakulinen T, Luostarinen T, Lehtinen M, Dillner J, Stenman UH, et al. High levels of circulating testosterone are not associated with increased prostate cancer risk: a pooled prospective study. *International journal of cancer* 2004;**108**: 418-24.
15. Manttari M, Elo O, Frick MH, Haapa K, Heinonen OP, Heinsalmi P, Helo P, Huttunen JK, Kaitaniemi P, Koskinen P, et al. The Helsinki Heart Study: basic design and randomization procedure. *Eur Heart J* 1987;**8 Suppl I**: 1-29.
16. Hyde Z, Flicker L, McCaul KA, Almeida OP, Hankey GJ, Chubb SAP, Yeap BB. Associations between testosterone levels and incident prostate, lung, and colorectal cancer. A population-based study. *Cancer Epidemiol Biomarkers Prev* 2012;**21**: 1319-29.
17. Chan YX, Alfonso H, Chubb SA, Handelsman DJ, Fegan PG, Hankey GJ, Golledge J, Flicker L, Yeap BB. Higher dihydrotestosterone is associated with the incidence of lung cancer in older men. *Horm Cancer* 2017;**8**: 119-26.
18. Norman PE, Flicker L, Almeida OP, Hankey GJ, Hyde Z, Jamrozik K. Cohort Profile: The Health In Men Study (HIMS). *Int J Epidemiol* 2009;**38**: 48-52.
19. Platz EA, Leitzmann MF, Rifai N, Kantoff PW, Chen YC, Stampfer MJ, Willett WC, Giovannucci E. Sex steroid hormones and the androgen receptor gene CAG repeat and subsequent risk of prostate cancer in the prostate-specific antigen era. *Cancer Epidemiol Biomarkers Prev* 2005;**14**: 1262-9.



20. Ozasa K, Nakao M, Watanabe Y, Hayashi K, Miki T, Mikami K, Mori M, Sakauchi F, Washio M, Ito Y, Suzuki K, Wakai K, et al. Serum phytoestrogens and prostate cancer risk in a nested case-control study among Japanese men. *Cancer Sci* 2004;**95**: 65-71.
21. Nomura A, Heilbrun LK, Stemmermann GN, Judd HL. Prediagnostic serum hormones and the risk of prostate cancer. *Cancer research* 1988;**48**: 3515-7.
22. Nomura AM, Stemmermann GN, Chyou PH, Henderson BE, Stanczyk FZ. Serum androgens and prostate cancer. *Cancer epidemiology, biomarkers & prevention : a publication of the American Association for Cancer Research, cosponsored by the American Society of Preventive Oncology* 1996;**5**: 621-5.
23. Sawada N, Iwasaki M, Inoue M, Sasazuki S, Yamaji T, Shimazu T, Tsugane S. Plasma testosterone and sex hormone-binding globulin concentrations and the risk of prostate cancer among Japanese men: a nested case-control study. *Cancer Sci* 2010;**101**: 2652-7.
24. Vatten LJ, Ursin G, Ross RK, Stanczyk FZ, Lobo RA, Harvei S, Jellum E. Androgens in serum and the risk of prostate cancer: a nested case-control study from the Janus serum bank in Norway. *Cancer epidemiology, biomarkers & prevention : a publication of the American Association for Cancer Research, cosponsored by the American Society of Preventive Oncology* 1997;**6**: 967-9.
25. Severi G, Morris HA, MacInnis RJ, English DR, Tilley W, Hopper JL, Boyle P, Giles GG. Circulating steroid hormones and the risk of prostate cancer. *Cancer Epidemiol Biomarkers Prev* 2006;**15**: 86-91.
26. Gill JK, Wilkens LR, Pollak MN, Stanczyk FZ, Kolonel LN. Androgens, growth factors and risk of prostate cancer: the Multiethnic Cohort. *Prostate* 2010;**70**: 906-15.
27. Mohr BA, Feldman HA, Kalish LA, Longcope C, McKinlay JB. Are serum hormones associated with the risk of prostate cancer? Prospective results from the Massachusetts Male Aging Study. *Urology* 2001;**57**: 930-5.
28. Thompson IM, Goodman PJ, Tangen CM, Lucia MS, Miller GJ, Ford LG, Lieber MM, Cespedes RD, Atkins JN, Lippman SM, Carlin SM, Ryan A, et al. The influence of finasteride on the development of prostate cancer. *N Engl J Med* 2003;**349**: 215-24.
29. Gann PH, Hennekens CH, Ma J, Longcope C, Stampfer MJ. Prospective study of sex hormone levels and risk of prostate cancer. *J Natl Cancer Inst* 1996;**88**: 1118-26.
30. Andriole GL, Crawford ED, Grubb RL, 3rd, Buys SS, Chia D, Church TR, Fouad MN, Isaacs C, Kvale PA, Reding DJ, Weissfeld JL, Yokochi LA, et al. Prostate cancer screening in the randomized Prostate, Lung, Colorectal, and Ovarian Cancer Screening Trial: mortality results after 13 years of follow-up. *J Natl Cancer Inst* 2012;**104**: 125-32.
31. Hayes RB, Reding D, Kopp W, Subar AF, Bhat N, Rothman N, Caporaso N, Ziegler RG, Johnson CC, Weissfeld JL, Hoover RN, Hartge P, et al. Etiologic and early marker studies in the prostate, lung, colorectal and ovarian (PLCO) cancer screening trial. *Control Clin Trials* 2000;**21**: 349s-55s.
32. Barrett-Connor E, Garland C, McPhillips JB, Khaw K-T, Wingard DL. A Prospective, Population-based Study of Androstenedione, Estrogens, and Prostatic Cancer. *Cancer research* 1990;**50**: 169-73.
33. Bycroft C, Freeman C, Petkova D, Band G, Elliott LT, Sharp K, Motyer A, Vukcevic D, Delaneau O, O'Connell J, Cortes A, Welsh S, et al. The UK Biobank resource with deep phenotyping and genomic data. *Nature* 2018;**562**: 203-9.
34. Watts EL, Fensom GK, Smith Byrne K, Perez-Cornago A, Allen NE, Knuppel A, Gunter MJ, Holmes MV, Martin RM, Murphy N, Tsilidis KK, Yeap BB, et al. Circulating insulin-like growth factor-I, total and free testosterone concentrations and prostate cancer risk in 200 000 men in UK Biobank. *Int J Cancer* 2020.
35. UK Biobank. Biomarker assay quality procedures: approaches used to minimise systematic and random errors (and the wider epidemiological implications), 2019.
36. Neuhauser ML, Platz EA, Till C, Tangen CM, Goodman PJ, Kristal A, Parnes HL, Tao Y, Figg WD, Lucia MS, Hoque A, Hsing AW, et al. Insulin-like growth factors and insulin-like growth factor-binding proteins and prostate cancer risk: results from the prostate cancer prevention trial. *Cancer Prev Res (Phila)* 2013;**6**: 91-9.
37. Key TJ, Appleby PN, Allen NE, Reeves GK. Pooling biomarker data from different studies of disease risk, with a focus on endogenous hormones. *Cancer epidemiology, biomarkers & prevention : a publication of the American Association for Cancer Research, cosponsored by the American Society of Preventive Oncology* 2010;**19**: 960-5.
38. Watts EL, Appleby PN, Perez-Cornago A, Bueno-de-Mesquita HB, Chan JM, Chen C, Cohn BA, Cook MB, Flicker L, Freedman ND, Giles GG, Giovannucci E, et al. Low free testosterone and prostate cancer risk: a collaborative analysis of 20 prospective studies. *Eur Urol* 2018;**74**: 585-94.
39. Travis RC, Appleby PN, Martin RM, Holly JM, Albanes D, Black A, Bueno-de-Mesquita HB, Chan JM, Chen C, Chirlaque MD, Cook MB, Deschasaux M, et al. A meta-analysis of individual participant data reveals an association between circulating levels of IGF-I and prostate cancer risk. *Cancer research* 2016;**76**: 2288-300.



40. Ruth KS, Day FR, Tyrrell J, Thompson DJ, Wood AR, Mahajan A, Beaumont RN, Wittemans L, Martin S, Busch AS, Erzurumluoglu AM, Hollis B, et al. Using human genetics to understand the disease impacts of testosterone in men and women. *Nature Medicine* 2020;**26**: 252-8.
41. Day FR, Loh P-R, Scott RA, Ong KK, Perry JRB. A Robust Example of Collider Bias in a Genetic Association Study. *Am J Hum Genet* 2016;**98**: 392-3.
42. Bycroft Cea. Genome-wide genetic data on ~500,000 UK Biobank participants 2017.
43. Schumacher FR, Al Olama AA, Berndt SI, Benlloch S, Ahmed M, Saunders EJ, Dadaev T, Leongamornlert D, Anokian E, Cieza-Borrella C, Goh C, Brook MN, et al. Association analyses of more than 140,000 men identify 63 new prostate cancer susceptibility loci. *Nature Genetics* 2018;**50**: 928-36.
44. Wu L, Wang J, Cai Q, Cavazos TB, Emami NC, Long J, Shu XO, Lu Y, Guo X, Bauer JA, Pasaniuc B, Penney KL, et al. Identification of novel susceptibility loci and genes for prostate cancer risk: a transcriptome-wide association study in over 140,000 European descendants. *Cancer research* 2019;**79**: 3192-204.
45. Burgess S, Bowden J. Integrating summarized data from multiple genetic variants in Mendelian randomization: bias and coverage properties of inverse-variance weighted methods. *arXiv preprint arXiv:151204486* 2015.
46. Bowden J, Del Greco M F, Minelli C, Davey Smith G, Sheehan NA, Thompson JR. Assessing the suitability of summary data for two-sample Mendelian randomization analyses using MR-Egger regression: the role of the I<sup>2</sup> statistic. *International Journal of Epidemiology* 2016;**45**: 1961-74.
47. Burgess S, Bowden J, Fall T, Ingelsson E, Thompson SG. Sensitivity Analyses for Robust Causal Inference from Mendelian Randomization Analyses with Multiple Genetic Variants. *Epidemiology* 2017;**28**: 30-42.
48. Verbanck M, Chen C-Y, Neale B, Do R. Detection of widespread horizontal pleiotropy in causal relationships inferred from Mendelian randomization between complex traits and diseases. *Nature Genetics* 2018;**50**: 693-8.
49. Burgess S, Thompson SG. Interpreting findings from Mendelian randomization using the MR-Egger method. *Eur J Epidemiol* 2017;**32**: 377-89.
50. Bowden J, Davey Smith G, Haycock PC, Burgess S. Consistent Estimation in Mendelian Randomization with Some Invalid Instruments Using a Weighted Median Estimator. *Genet Epidemiol* 2016;**40**: 304-14.
51. Burgess S, Foley CN, Allara E, Staley JR, Howson JMM. A robust and efficient method for Mendelian randomization with hundreds of genetic variants. *Nature Communications* 2020;**11**: 376.
52. Holmes MV, Richardson TG, Ference BA, Davies NM, Davey Smith G. Integrating genomics with biomarkers and therapeutic targets to invigorate cardiovascular drug development. *Nat Rev Cardiol* 2021.
53. Hemani G, Zheng J, Elsworth B, Wade KH, Haberland V, Baird D, Laurin C, Burgess S, Bowden J, Langdon R, Tan VY, Yarmolinsky J, et al. The MR-Base platform supports systematic causal inference across the human phenome. *eLife* 2018;**7**: e34408.
